# Supplementary material for: Profiling the bloodstream form and procyclic form Trypanosoma brucei cell cycle using single cell transcriptomics
Source: bioRxiv preprint, doi:10.1101/2023.01.09.523263, version 1 (2023-01-09)
Supplement: Supplementary data 2 [file 523263_file04.xlsx]

## Sheet: BSF pseudobulk
Comparison of fresh and frozen BSF samples of pseudobulked transcripts. The average transcript count across cells is shown per gene (feature), for each sample along with the log2(FC). Genes with log2 (FC) over or above 1 were consvered up or down regulated. Genes with average expression < 0.05 were not considered.
Feature	BSF-fresh	BSF-frozen	log2 BSF_FC	diffexpressed
Tb427-100060400	17.9678	7.86079	-1.19267	downregulated
Tb427-010017400	10.5876	5.10161	-1.05335	downregulated
Tb427-090058000	7.58387	3.53524	-1.10112	downregulated
Tb427-000668200	6.08269	2.59555	-1.22867	downregulated
Tb427-100060200	5.73012	2.81935	-1.0232	downregulated
Tb427-090031800	2.77127	1.28953	-1.10371	downregulated
Tb427-000110300	1.95033	0.746283	-1.38592	downregulated
Tb427-030040600	1.93215	0.818204	-1.23968	downregulated
Tb427-000015300	1.79032	0.622247	-1.52466	downregulated
Tb427-000014700	1.7086	0.785687	-1.12079	downregulated
Tb427-030040400	1.66147	0.681977	-1.28466	downregulated
Tb427-100146700	1.1999	0.569061	-1.07626	downregulated
Tb427-100160100	1.156	0.47068	-1.29633	downregulated
Tb427-000015600:pseudogene	1.09093	0.512125	-1.09099	downregulated
Tb427-010026900	1.08138	0.503398	-1.1031	downregulated
Tb427-040025600	0.817676	0.397894	-1.03915	downregulated
Tb427-090058900	0.691333	0.227982	-1.60046	downregulated
Tb427-050044900	0.650217	0.241442	-1.42924	downregulated
Tb427-000015400	0.576491	0.221801	-1.37803	downregulated
Tb427-080022300	0.474528	0.216976	-1.12896	downregulated
Tb427-110130000	0.236349	0.110857	-1.09222	downregulated
Tb427-000015900:pseudogene	0.221188	0.10575	-1.06461	downregulated
Tb427-050013600	0.215276	0.102116	-1.07597	downregulated
Tb427-030013200	0.192861	0.0918749	-1.06982	downregulated
Tb427-060042200	0.191494	0.0892417	-1.10151	downregulated
Tb427-000024700	0.184331	0.0701572	-1.39364	downregulated
Tb427-000015500	0.163929	0.0720915	-1.18517	downregulated
Tb427-040027400	0.163107	0.0805534	-1.0178	downregulated
Tb427-050009000	1.28103	2.57882	1.00941	upregulated
Tb427-110185100	0.983196	1.98808	1.01583	upregulated
Tb427-100055700:pseudogene	0.617986	1.584	1.35793	upregulated
Tb427-070005400	0.608159	1.26426	1.05577	upregulated
Tb427-010016300	0.56894	1.23701	1.12051	upregulated
Tb427-100109300	0.4567	0.935706	1.03481	upregulated
Tb427-010024700	0.385812	0.865371	1.16542	upregulated
Tb427-060043800	0.376221	0.763627	1.02129	upregulated
Tb427-070063800	0.362007	0.724946	1.00186	upregulated
Tb427-000771000	0.316256	0.732272	1.21129	upregulated
Tb427-030033700	0.309286	0.623894	1.01236	upregulated
Tb427-060008400	0.293303	1.01798	1.79525	upregulated
Tb427-030044900	0.273453	0.575739	1.07412	upregulated
Tb427-050005700	0.244475	0.500322	1.03317	upregulated
Tb427-030051700	0.226933	0.470454	1.05179	upregulated
Tb427-050007300	0.193158	0.432812	1.16396	upregulated
Tb427-000107300:pseudogene	0.149147	0.342664	1.20006	upregulated
Tb427-110055000	0.144796	0.327806	1.17882	upregulated
Tb427-100055600	0.141086	0.323139	1.19558	upregulated
Tb427-070031300	0.139141	0.302169	1.11881	upregulated
Tb427-100109200	0.133669	0.461148	1.78656	upregulated
Tb427-080019000	0.120409	0.281051	1.22289	upregulated
Tb427-080005400:pseudogene	0.109335	0.231612	1.08295	upregulated
Tb427-000516400	0.0977198	0.220301	1.17276	upregulated
Tb427-100087300	0.0967616	0.197196	1.02712	upregulated
Tb427-000144500	0.0964855	0.232913	1.2714	upregulated
Tb427-070031200	0.0963147	0.210418	1.12743	upregulated
Tb427-040041500	0.094982	0.230936	1.28177	upregulated
Tb427-100102900	0.0875203	0.175589	1.00451	upregulated
Tb427-060011300	0.0856974	0.200154	1.22379	upregulated
Tb427-050007600:pseudogene	0.0815457	0.239039	1.55156	upregulated
Tb427-050005500	0.0790866	0.164695	1.05829	upregulated
Tb427-020016000	0.075398	0.15356	1.02621	upregulated
Tb427-000445700:pseudogene	0.0748209	0.162242	1.11663	upregulated
Tb427-110019500	0.0743287	0.173611	1.22387	upregulated
Tb427-110143800	0.0733995	0.163819	1.15826	upregulated
Tb427-070038100	0.0696085	0.139724	1.00525	upregulated
Tb427-060011400:pseudogene	0.0686722	0.153119	1.15686	upregulated
Tb427-070068700	0.0671952	0.138203	1.04036	upregulated
Tb427-090021600	0.0669118	0.144325	1.10898	upregulated
Tb427-000272800:pseudogene	0.0616397	0.132152	1.10026	upregulated
Tb427-060008500	0.060778	0.166972	1.45799	upregulated
Tb427-000516500:pseudogene	0.060655	0.152449	1.32963	upregulated
Tb427-070005200:pseudogene	0.0599798	0.12642	1.07567	upregulated
Tb427-110046100	0.0599697	0.123198	1.03867	upregulated
Tb427-020032500	0.0564611	0.11311	1.0024	upregulated
Tb427-000107500:pseudogene	0.0558664	0.167591	1.58489	upregulated
Tb427-010005300	0.0555134	0.12716	1.19573	upregulated
Tb427-000348300:pseudogene	0.0544682	0.125752	1.2071	upregulated
Tb427-070075900	4059.91	4665.79	0.200673
Tb427-000016000	1056.94	1335.86	0.337876
Tb427-010025700	484.733	547.516	0.175711
Tb427-070076200	74.6967	63.397	-0.23663
Tb427-110013500	30.3013	18.5546	-0.7076
Tb427-000729100	25.4692	20.38	-0.321599
Tb427-100096400	23.304	27.6452	0.246454
Tb427-090027000	21.9602	16.8509	-0.382062
Tb427-100044400	21.6587	20.6896	-0.0660432
Tb427-090061600	13.3528	15.256	0.192239
Tb427-060046300	12.2598	12.3641	0.0122261
Tb427-100157100	11.9546	7.89419	-0.5987
Tb427-090027100	11.3973	11.0292	-0.0473639
Tb427-000667900	10.8115	15.6509	0.533673
Tb427-000775700	10.6302	7.46836	-0.50931
Tb427-050012900	10.1036	11.3554	0.168506
Tb427-100064900	10.0745	6.68175	-0.592417
Tb427-100023600	9.75051	6.79527	-0.520948
Tb427-040015300	9.48522	7.69974	-0.300872
Tb427-110009200	9.45746	11.542	0.28737
Tb427-100149600	9.44653	8.72545	-0.114554
Tb427-030033300	9.22329	7.58733	-0.281689
COIII	9.01004	9.71349	0.108456
Tb427-100062200	8.70381	10.1362	0.219802
Tb427-040027800	7.90656	9.01156	0.188727
Tb427-020031600	7.40362	4.88416	-0.600121
Tb427-030055300	7.31214	4.73862	-0.625825
Tb427-110081800	7.13081	5.28701	-0.431614
Tb427-050012800	6.15007	8.44614	0.457688
Tb427-010026000	5.76971	5.25201	-0.135629
Tb427-030006900	5.52053	6.78206	0.296917
Tb427-000666100	5.45898	6.51134	0.254323
Tb427-040053500	5.40714	5.2144	-0.0523648
Tb427-080009100	5.30234	5.08106	-0.0615008
Tb427-070050700	5.30058	3.42335	-0.630744
Tb427-090074600	5.24452	3.28883	-0.673237
Tb427-080021500	5.22275	5.39564	0.046985
Tb427-090049100	5.19257	6.62472	0.351412
Tb427-030010900	5.04603	5.35392	0.0854481
Tb427-090014800	4.55136	4.20353	-0.114695
Tb427-110189900	4.42929	3.86391	-0.197015
Tb427-100076900	4.38726	5.38194	0.294805
Tb427-030043800	4.37457	4.56207	0.0605467
Tb427-070040800	4.35758	5.12366	0.233649
Tb427-000014400	4.26874	3.65893	-0.222387
Tb427-100017900	4.26416	4.44607	0.0602668
Tb427-040033100	4.24177	4.62969	0.126248
Tb427-040020900	4.15169	3.90938	-0.0867577
12S-rRNA	4.13307	6.48636	0.650196
Tb427-080056500	4.09693	3.56734	-0.199695
Tb427-080079900	4.01224	3.71641	-0.110496
Tb427-030030200	3.9163	2.50651	-0.643814
Tb427-100049800	3.90924	2.48457	-0.653892
Tb427-090034500	3.82016	3.67638	-0.0553479
Tb427-050026200	3.81714	3.47945	-0.133636
Tb427-020006900	3.73444	4.52383	0.276653
Tb427-070075400:pseudogene	3.7121	2.58891	-0.519892
Tb427-040029800	3.68317	4.30428	0.224825
Tb427-070063700	3.67378	3.80306	0.0498987
Tb427-100064600	3.59927	3.58814	-0.00447036
Tb427-070050400	3.55032	3.39586	-0.0641709
Tb427-080088800	3.54604	2.89536	-0.292467
Tb427-100025200	3.50713	4.85428	0.468968
Tb427-070047100	3.48232	3.72471	0.0970819
Tb427-110042100	3.42295	3.0162	-0.182511
Tb427-050014700	3.41792	2.36739	-0.52982
Tb427-100167200	3.41389	3.00634	-0.183406
Tb427-090080200	3.40014	3.17216	-0.100126
Tb427-070045100	3.2428	4.55367	0.489793
Tb427-110150500	3.22546	3.90664	0.276423
Tb427-110123100	3.20104	3.32877	0.056448
Tb427-110067200	3.16957	3.12777	-0.0191517
Tb427-010029100	3.11611	3.08542	-0.0142815
Tb427-100089200	3.08273	3.02331	-0.0280776
Tb427-100064700	3.03966	2.25036	-0.433754
Tb427-060009000	3.01475	2.04477	-0.560095
Tb427-020022600	2.93622	2.944	0.0038193
Tb427-110009700	2.91458	2.38954	-0.286554
Tb427-060039800	2.89858	3.85269	0.410517
Tb427-110167900	2.8671	2.04587	-0.486877
Tb427-040046900	2.856	2.64198	-0.112375
Tb427-100064800	2.83779	1.59068	-0.835128
Tb427-110169500	2.79842	2.26216	-0.306911
Tb427-100015000	2.76595	2.42925	-0.187263
Tb427-110064600	2.75736	2.59612	-0.0869333
Tb427-070017200	2.74835	2.80253	0.0281616
Tb427-100049600	2.74761	1.65081	-0.735005
Tb427-110031000	2.72848	2.60496	-0.0668388
Tb427-090036700	2.71496	3.21642	0.244526
Tb427-090077900	2.71413	1.94816	-0.478379
Tb427-060043400	2.69306	2.6646	-0.0153303
Tb427-070050100	2.68936	2.48832	-0.112095
Tb427-100156200	2.66519	2.28557	-0.221686
Tb427-030018100	2.65498	3.17872	0.259746
Tb427-100085200	2.65229	2.02049	-0.392536
ND7	2.62752	2.02453	-0.376119
Tb427-100149700:pseudogene	2.62447	2.54637	-0.0435874
Tb427-110037600	2.61713	2.23057	-0.230571
Tb427-090034800	2.58435	1.69677	-0.607006
Tb427-000663900	2.54555	3.49577	0.457631
Tb427-030040300	2.544	3.57876	0.492363
Tb427-030022000	2.50952	2.49902	-0.00604508
Tb427-000014500:pseudogene	2.50051	2.50813	0.00439463
Tb427-070047200	2.40193	2.34412	-0.0351474
Tb427-100125100	2.38432	2.80435	0.234088
Tb427-100135700	2.36348	2.88954	0.289929
Tb427-020017800	2.36022	2.8395	0.266715
Tb427-070076300	2.35326	3.71576	0.658995
Tb427-080088400	2.35126	2.3851	0.0206148
Tb427-100161200	2.32373	2.87775	0.308499
Tb427-110159100	2.29769	2.35667	0.0365673
Tb427-050015800	2.2741	2.50739	0.140895
Tb427-110031800	2.25473	2.36323	0.0678039
Tb427-080046800	2.24065	2.93831	0.391068
Tb427-090061000	2.23426	2.15677	-0.0509273
Tb427-100008600	2.22583	2.22166	-0.00270698
Tb427-060033000	2.22561	1.88374	-0.240598
Tb427-020013400	2.20538	2.25162	0.0299366
Tb427-090066200	2.18744	1.23421	-0.825656
Tb427-070031000	2.18529	2.13056	-0.0365903
Tb427-060025400	2.18028	1.43233	-0.606156
Tb427-070031100	2.17573	2.72213	0.323242
Tb427-040022700	2.17448	1.29841	-0.743925
Tb427-060018100	2.14784	2.72915	0.345565
Tb427-110038200	2.14779	2.7542	0.358786
Tb427-070026200	2.14219	2.95396	0.463565
Tb427-060042300	2.11491	1.38187	-0.61398
Tb427-060013500	2.11311	1.66463	-0.344162
Tb427-080036000	2.10524	2.23365	0.0854201
Tb427-080007500	2.0993	1.31164	-0.678532
Tb427-000073700:pseudogene	2.08695	1.05257	-0.987481
Tb427-090031700	2.0786	1.73981	-0.256682
Tb427-080029600	2.06843	1.96171	-0.0764222
Tb427-110160400	2.05082	1.69813	-0.272248
Tb427-010022900	2.04673	2.0169	-0.0211825
Tb427-110073700	2.0408	1.56788	-0.380319
Tb427-110178000	2.03991	1.82693	-0.159087
Tb427-030009000	2.03362	1.6537	-0.298356
Tb427-100062500	2.02813	1.79158	-0.178919
Tb427-110158700	2.00621	1.51182	-0.408186
Tb427-110024600	1.99798	1.82749	-0.128678
Tb427-090064500	1.99626	1.50119	-0.411196
Tb427-020011800	1.98605	3.06947	0.628093
Tb427-080070100	1.97768	2.40515	0.282323
Tb427-060055700	1.97297	2.05138	0.0562292
Tb427-090073100	1.95428	1.20675	-0.695508
Tb427-090042600	1.94541	2.16958	0.157341
Tb427-100162100	1.94428	2.83505	0.544135
Tb427-100026600	1.93317	1.74442	-0.148219
Tb427-070047000	1.93311	1.23046	-0.651721
Tb427-080007400	1.90353	2.91259	0.613622
Tb427-100037100	1.90089	2.05535	0.112713
Tb427-100135200:pseudogene	1.89288	2.58934	0.451998
Tb427-030018900	1.88727	1.59884	-0.239276
Tb427-110009300	1.87555	2.47798	0.401849
Tb427-080073900	1.85966	1.81081	-0.0384031
Tb427-090045300	1.85036	1.73327	-0.0943113
Tb427-100154100	1.84455	1.94755	0.0783868
Tb427-100134500	1.84449	1.57514	-0.227744
Tb427-110133400	1.838	1.63338	-0.170274
Tb427-030007100	1.83498	3.12508	0.768129
Tb427-010031000	1.82939	1.60007	-0.193228
Tb427-110049700	1.81681	1.79611	-0.0165335
Tb427-110051100	1.80891	1.92165	0.0872269
Tb427-110131800	1.78726	1.54024	-0.21459
Tb427-110015700	1.77912	1.73786	-0.0338533
Tb427-110133300	1.77864	2.26995	0.35189
Tb427-060042400	1.77788	1.02658	-0.792308
Tb427-080042600	1.76561	1.51946	-0.216612
Tb427-110187400	1.75578	1.70546	-0.0419504
Tb427-060039700	1.7322	2.45279	0.501814
Tb427-090044800	1.73045	1.21055	-0.515486
Tb427-100041200	1.7284	2.0085	0.216678
Tb427-080048200	1.72289	1.38949	-0.310273
Tb427-100146000	1.72089	1.79243	0.0587669
Tb427-100095100	1.70465	1.9797	0.215806
Tb427-100102600	1.70449	1.45288	-0.230429
Tb427-110023800	1.70426	1.38009	-0.304387
Tb427-090072800	1.68813	1.55607	-0.117518
Tb427-060055100	1.68322	2.30504	0.453573
Tb427-040015600	1.68036	2.09736	0.319807
Tb427-090066100	1.67786	1.16706	-0.523745
Tb427-080072900	1.66731	1.4683	-0.183382
Tb427-020017700	1.66144	2.4831	0.579708
Tb427-110107000	1.65949	1.88187	0.181433
Tb427-100112400	1.6499	2.58019	0.645099
Tb427-110125400	1.64376	1.71086	0.0577212
Tb427-050010800	1.64032	2.22412	0.439263
Tb427-070066900	1.63269	1.4578	-0.163456
Tb427-040036000	1.62703	1.55394	-0.0663046
Tb427-010016800	1.61656	2.61564	0.694236
Tb427-010027100	1.61157	1.59927	-0.0110595
Tb427-100061800	1.60008	1.30183	-0.297601
Tb427-110060300	1.59743	0.993633	-0.684972
Tb427-110105700	1.58958	1.5875	-0.00188868
Tb427-070025800	1.58744	1.96392	0.307031
Tb427-100106800	1.57414	1.77957	0.176961
Tb427-060020800:pseudogene	1.57131	1.64751	0.0683183
Tb427-110048100	1.57084	1.5907	0.0181282
Tb427-100037700	1.56788	1.52781	-0.0373518
Tb427-010006500	1.5648	0.996267	-0.651371
Tb427-080068100	1.56076	1.78631	0.194732
Tb427-110073800	1.55757	1.63291	0.0681448
Tb427-100120900	1.5568	1.51857	-0.0358692
Tb427-070027000	1.55053	1.68841	0.122904
Tb427-090089800	1.54855	1.72159	0.152822
Tb427-060017600	1.54173	1.5267	-0.0141274
Tb427-100098000	1.53927	1.84947	0.264869
Tb427-090042400	1.53807	2.68338	0.802929
Tb427-000015200:pseudogene	1.53736	1.08925	-0.497112
Tb427-100078900	1.53157	1.54111	0.0089522
Tb427-060049500	1.52806	1.49998	-0.0267574
Tb427-090053700	1.5225	1.65191	0.117693
Tb427-110029200	1.52058	1.4685	-0.0502796
Tb427-100018100	1.50094	1.48831	-0.0121935
Tb427-110027200	1.49643	1.88597	0.333785
Tb427-090052000	1.49557	1.09974	-0.443534
Tb427-100109500	1.48794	0.99909	-0.574625
Tb427-020021800	1.48555	1.24386	-0.256174
Tb427-030054300	1.47418	2.539	0.784353
Tb427-030058700	1.4739	1.74119	0.24044
Tb427-110075000	1.46479	1.57793	0.107344
Tb427-050021900	1.45603	1.85198	0.347029
Tb427-020011600	1.45375	1.52376	0.0678481
Tb427-110150100	1.45017	1.93219	0.414014
Tb427-100013900	1.44902	1.27284	-0.187028
Tb427-050051200	1.43401	1.87767	0.388891
Tb427-090083000	1.43198	1.20025	-0.254679
Tb427-080028700	1.43192	1.319	-0.118501
Tb427-040023100	1.43124	1.02644	-0.479612
Tb427-110165900	1.41562	1.8306	0.370885
Tb427-110079200	1.41123	1.47213	0.0609554
Tb427-110178400	1.40882	1.47266	0.063938
Tb427-080011300	1.40463	1.60954	0.196454
Tb427-100097400	1.40086	0.864565	-0.696266
Tb427-110054100	1.3995	1.85858	0.409283
Tb427-100149900	1.39833	0.961868	-0.539798
Tb427-060039900	1.3978	1.47146	0.0740854
Tb427-080009200	1.39719	1.41863	0.0219668
Tb427-060052900	1.39514	1.44105	0.0467121
Tb427-050015600	1.39142	1.68034	0.272194
Tb427-010015100	1.38681	1.53567	0.147095
Tb427-080018400	1.3863	1.12613	-0.299872
Tb427-100135600	1.3851	1.38018	-0.00513144
Tb427-090028400	1.38483	0.895939	-0.628235
Tb427-080028400	1.38313	1.42215	0.0401391
Tb427-090082500	1.37522	1.24894	-0.138968
Tb427-050013400:pseudogene	1.36966	1.2676	-0.111713
Tb427-110042900	1.36723	1.60474	0.231086
Tb427-030026600	1.36603	1.06381	-0.36074
Tb427-110089700	1.36212	1.55957	0.195297
Tb427-110103300	1.35731	1.27906	-0.0856606
Tb427-050025600	1.35034	0.80535	-0.745635
Tb427-100007900	1.35016	1.68346	0.318301
Tb427-010027700	1.34949	1.37304	0.024958
Tb427-080070200	1.34868	1.28084	-0.0744603
Tb427-080067500	1.34659	1.58764	0.237577
Tb427-080049200	1.33489	0.842491	-0.663982
Tb427-100149800	1.33416	1.38644	0.0554632
Tb427-100016900	1.33251	0.860976	-0.630104
Tb427-030037700	1.33172	1.62886	0.290564
Tb427-100120100	1.32807	1.35752	0.0316405
Tb427-100135400	1.3265	1.4564	0.134788
Tb427-070055900	1.32163	1.46956	0.153074
Tb427-090089500	1.32147	1.96353	0.571305
Tb427-070038600	1.32022	1.48262	0.167378
Tb427-110079500	1.31533	1.14127	-0.204779
Tb427-100123000	1.31445	1.57851	0.264103
Tb427-070010500	1.30991	1.25516	-0.0615985
Tb427-040027000	1.29553	1.20605	-0.103252
Tb427-110012100	1.29478	1.49814	0.210459
Tb427-040023200	1.29269	1.40427	0.119444
Tb427-080065400	1.28698	1.47116	0.192958
Tb427-100142600	1.28536	1.55718	0.276765
Tb427-100091700	1.27581	0.916347	-0.477445
Tb427-080084500	1.27444	2.2465	0.817812
Tb427-080066000	1.27243	1.65516	0.379382
Tb427-100094000	1.27136	1.39784	0.13682
Tb427-110025500	1.2686	1.5915	0.327146
Tb427-100073300	1.26826	0.802844	-0.659654
Tb427-100008500	1.26131	1.39937	0.149851
Tb427-040014600	1.25841	1.30917	0.0570535
Tb427-010015900	1.25713	1.67697	0.415727
Tb427-060036900	1.25586	1.98751	0.662291
Tb427-090090000	1.25538	1.47367	0.231293
Tb427-110037500	1.25431	1.02634	-0.289388
Tb427-070026500	1.254	1.12759	-0.153291
Tb427-110084200	1.24211	1.27035	0.0324302
Tb427-110160900	1.2408	1.15058	-0.108917
Tb427-110124300	1.24011	1.24193	0.00211256
Tb427-080023700	1.23997	0.884895	-0.486733
Tb427-100048300	1.23574	1.31002	0.0842074
Tb427-020013300	1.2292	1.3783	0.165166
Tb427-110055100	1.22891	1.05818	-0.215785
Tb427-070076700	1.22815	1.20963	-0.0219235
Tb427-110123300	1.22585	2.07129	0.75674
Tb427-080050400	1.22046	1.33687	0.131435
Tb427-100127800	1.21925	1.2471	0.0325834
Tb427-030010100	1.21739	1.42349	0.225644
Tb427-010020200	1.21684	1.27169	0.0636098
Tb427-100091100	1.21496	1.34691	0.148741
Tb427-100134400	1.21427	1.1711	-0.0522224
Tb427-090052600	1.21265	0.697747	-0.797385
Tb427-080010100	1.21251	1.46528	0.273189
Tb427-100015200	1.21206	0.848143	-0.515081
Tb427-070069900	1.20746	1.05565	-0.193847
Tb427-040006200	1.20703	0.996736	-0.276179
Tb427-110152900	1.20304	1.34397	0.159809
Tb427-080043300	1.20027	1.67264	0.478776
Tb427-020019800	1.1997	1.57282	0.39068
Tb427-090006300	1.18857	0.938516	-0.340778
Tb427-060035100	1.18399	1.92552	0.701601
Tb427-110041200	1.1833	1.65172	0.481158
Tb427-070045200	1.18085	1.33186	0.173613
Tb427-030009900	1.17915	1.36556	0.211739
Tb427-070040900	1.17877	1.17285	-0.00726789
Tb427-070053300	1.17817	0.742834	-0.665433
Tb427-110012300	1.17612	1.21282	0.0443244
Tb427-090080100	1.17456	1.1815	0.00850095
Tb427-030045800	1.17237	1.97353	0.751356
Tb427-080018300	1.16938	1.05239	-0.152085
Tb427-100160500	1.16215	0.70984	-0.711227
Tb427-090058400	1.16149	0.8777	-0.404178
Tb427-050035000	1.15793	1.51896	0.39154
Tb427-050020400	1.15616	1.17736	0.0262188
Tb427-100153200	1.15373	1.39664	0.275655
Tb427-100033500	1.15058	1.06496	-0.111564
Tb427-080017800	1.14704	1.1868	0.0491567
Tb427-100080100	1.14494	1.19688	0.0640082
Tb427-110137800	1.14261	1.75266	0.617218
Tb427-010010600	1.14155	1.48992	0.384242
Tb427-100011100	1.14145	1.32604	0.216259
Tb427-060018300	1.13322	1.15348	0.0255753
Tb427-100008800	1.13259	1.36835	0.272815
Tb427-100011600	1.13187	1.22938	0.119223
Tb427-020021900	1.12731	0.7722	-0.545831
Tb427-110070900	1.12641	0.915273	-0.299464
Tb427-100042900	1.12636	1.16493	0.0485776
Tb427-100046100	1.12469	1.2509	0.153436
Tb427-110105600	1.1246	1.15291	0.0358601
Tb427-010012000	1.11993	1.13582	0.0203225
Tb427-100078300	1.1193	1.02262	-0.130319
Tb427-010030100	1.11929	0.99833	-0.165002
Tb427-100086000	1.11816	1.09724	-0.027257
Tb427-040042400	1.11796	1.91925	0.779677
Tb427-010031200	1.11571	1.28742	0.206523
Tb427-070054600	1.11496	1.56528	0.489423
Tb427-090049800	1.11283	0.705064	-0.658401
Tb427-100026100	1.11265	1.05607	-0.0752873
Tb427-010014300	1.11177	1.06045	-0.0681863
Tb427-040056300	1.11163	1.50337	0.435524
Tb427-080008900	1.11061	1.43941	0.374126
Tb427-110031400	1.10957	0.598292	-0.891078
Tb427-090085400	1.10872	1.10108	-0.00997603
Tb427-100153700:pseudogene	1.10817	1.38478	0.321475
Tb427-110152700	1.10763	1.36989	0.306584
Tb427-050026300	1.10223	1.62302	0.558251
Tb427-110087200	1.10114	1.07115	-0.0398321
Tb427-110092100	1.0982	1.03072	-0.0914962
Tb427-010016700	1.09737	1.55621	0.503991
Tb427-110051000	1.09583	1.25436	0.194931
Tb427-090050100	1.09579	0.694442	-0.65805
Tb427-100032500	1.09532	0.825402	-0.408185
Tb427-080077300	1.09347	1.01916	-0.101534
Tb427-100031000	1.08963	1.08319	-0.00854817
Tb427-010019800	1.08832	0.997638	-0.125516
Tb427-100099100	1.08607	1.28653	0.244377
Tb427-040021400	1.08586	0.990652	-0.132394
Tb427-030034700	1.08114	1.23421	0.191037
Tb427-100006500	1.07319	1.5702	0.549048
Tb427-100081800	1.07094	1.33768	0.320858
Tb427-040015000	1.06981	1.08379	0.0187326
Tb427-110138000	1.06825	1.42964	0.420395
MURF4	1.06766	0.844411	-0.338438
Tb427-100134200	1.06748	1.00426	-0.0880755
Tb427-110009500	1.06747	1.55609	0.543731
Tb427-110049600	1.06722	1.10234	0.0467069
Tb427-110078600	1.05829	1.23089	0.217976
Tb427-110107600	1.05752	0.673135	-0.651711
Tb427-070042200	1.0537	1.21715	0.208046
Tb427-050032100	1.05213	0.672981	-0.644677
Tb427-040006400	1.04978	0.876893	-0.259618
Tb427-080013400	1.04706	1.41562	0.43508
Tb427-080040100	1.04577	1.07988	0.0463042
Tb427-080072600	1.04569	1.48947	0.510343
Tb427-030033800	1.04152	1.40966	0.436652
Tb427-100049700	1.03984	0.678791	-0.615318
Tb427-040023000	1.03853	0.568722	-0.868747
Tb427-110187100	1.03733	1.18688	0.19429
Tb427-030050600	1.03625	0.832454	-0.315934
Tb427-060055400	1.03215	1.3635	0.401656
Tb427-110131100	1.03045	0.921051	-0.16192
Tb427-090029000	1.02879	0.964266	-0.0934393
Tb427-100069700	1.02842	0.829457	-0.310189
Tb427-100153300	1.02252	0.859432	-0.250672
Tb427-110069400	1.0168	0.79505	-0.354923
Tb427-080085400	1.01594	1.32674	0.385067
Tb427-010011700	1.01583	1.50102	0.563279
Tb427-080021200	1.01377	0.968576	-0.0657938
Tb427-050011000	1.01264	1.32838	0.391553
Tb427-100145300	1.0126	0.850129	-0.252315
Tb427-050026400:pseudogene	1.01076	0.666744	-0.60023
Tb427-110014900	1.00987	0.956683	-0.0780576
Tb427-110028600	1.00893	1.07167	0.0870304
Tb427-080063000	1.00804	0.891901	-0.176604
Tb427-020030800	1.00769	1.2934	0.36012
Tb427-070049900	1.00727	1.35201	0.424648
Tb427-110185900	1.00721	1.26771	0.331852
Tb427-110017300	1.0071	1.70948	0.763354
Tb427-040009500	1.00603	0.832139	-0.273778
Tb427-100155900	1.00462	0.776008	-0.372501
Tb427-030039700	1.00289	1.25439	0.322821
Tb427-110068900	1.00012	0.951884	-0.0713212
Tb427-110021800	0.997877	0.957686	-0.0593092
Tb427-080066700	0.997371	1.02087	0.033591
Tb427-050016400	0.996997	0.892649	-0.159497
Tb427-100100500	0.991006	1.43715	0.536249
Tb427-040040200	0.990826	1.06328	0.101821
Tb427-110150600	0.989901	0.863786	-0.19661
Tb427-040007500	0.989397	0.912174	-0.11724
Tb427-100077100	0.980138	0.977826	-0.00340687
Tb427-090039900	0.979951	0.88703	-0.143726
Tb427-080070000	0.979792	0.823155	-0.251311
Tb427-100027900	0.979575	0.770967	-0.345487
Tb427-110159900	0.97778	0.75215	-0.378489
Tb427-090047200	0.976488	1.10095	0.173071
Tb427-080039100	0.975165	1.18897	0.285993
Tb427-090051000	0.973063	0.740507	-0.39402
Tb427-070028000	0.972902	1.12238	0.206197
Tb427-100033600	0.969786	0.565759	-0.77748
Tb427-090012800	0.967622	1.12823	0.221551
Tb427-050038600	0.966597	0.756502	-0.353571
Tb427-040048900	0.964909	1.10788	0.199334
Tb427-050039000	0.964834	0.885598	-0.123628
Tb427-100101600	0.964065	1.20319	0.319667
Tb427-080006700	0.962727	0.740008	-0.379585
Tb427-070051200	0.961519	0.945315	-0.0245206
Tb427-000752900	0.959637	1.2102	0.334687
Tb427-080020700	0.957032	1.15819	0.275234
Tb427-100011900	0.956802	1.01083	0.0792423
Tb427-050032600	0.956596	1.40716	0.556808
Tb427-050052200	0.95528	1.33885	0.487002
Tb427-070026000	0.955172	1.52335	0.673413
Tb427-050025800	0.952321	1.06658	0.163467
Tb427-060032000	0.951718	1.00567	0.0795453
9S-rRNA	0.950339	1.48165	0.640696
Tb427-100101500	0.949337	0.9149	-0.0533068
Tb427-110019200	0.948776	1.35878	0.518172
Tb427-090032300	0.948526	0.967735	0.0289243
Tb427-100107300	0.946863	0.890653	-0.0882923
Tb427-020020500	0.945885	0.819431	-0.207042
Tb427-020008100	0.945625	1.24821	0.400516
Tb427-090049000	0.94358	1.00813	0.0954713
Tb427-110138800	0.940412	1.10632	0.234399
Tb427-110158600	0.937577	1.23929	0.402507
Tb427-020019500	0.936816	0.805795	-0.217354
Tb427-110147700	0.935049	0.670917	-0.478908
Tb427-110122800	0.934546	0.925916	-0.0133853
Tb427-110167200	0.934351	0.934376	3.83947e-05
Tb427-040009000	0.934345	1.13974	0.286673
Tb427-110120900	0.933232	1.12773	0.273112
Tb427-110158000	0.931445	1.14506	0.297882
Tb427-100017000	0.926543	0.74524	-0.314153
Tb427-090026000	0.9251	0.949451	0.0374842
Tb427-040038300	0.923809	1.16326	0.332512
Tb427-070014900	0.919802	0.630439	-0.544967
Tb427-100125200	0.919563	1.11032	0.271952
Tb427-110121900	0.917911	0.753298	-0.285134
Tb427-080023900	0.917018	0.554718	-0.725195
Tb427-080035500	0.913843	1.06708	0.223649
Tb427-110005500	0.91199	1.12445	0.302127
Tb427-110011000	0.911779	1.10889	0.282357
Tb427-090032000	0.911073	0.490235	-0.894094
Tb427-100060100	0.910826	1.00772	0.145847
Tb427-090024700	0.910745	0.666926	-0.44952
Tb427-090063500	0.90765	1.10156	0.279339
Tb427-080081600	0.90601	0.879497	-0.0428488
Tb427-040047300	0.905032	0.538704	-0.748476
Tb427-070026100	0.904787	1.24833	0.464351
Tb427-030045400	0.89566	0.801922	-0.159489
Tb427-100096100	0.895313	0.916139	0.033175
Tb427-040050500	0.894846	0.983826	0.136764
Tb427-110011100	0.893982	0.948649	0.0856285
Tb427-030022800	0.89011	0.761257	-0.2256
Tb427-030031200	0.889872	1.23754	0.4758
Tb427-100033200	0.889737	0.694994	-0.35638
Tb427-100128300	0.885084	0.901773	0.026949
COI	0.88495	1.46794	0.730122
Tb427-070067600	0.881577	1.21011	0.456985
Tb427-080084800	0.877678	1.17255	0.417886
Tb427-100037500	0.876528	0.737103	-0.249934
Tb427-110020300	0.875665	0.735699	-0.251263
Tb427-060041400	0.874509	0.879989	0.00901206
Tb427-100165700	0.874085	1.00461	0.200789
Tb427-100015100	0.872276	0.704796	-0.307579
Tb427-040041800	0.868964	0.843107	-0.0435819
Tb427-100134800	0.865778	1.26548	0.54762
Tb427-090065900	0.864997	0.828888	-0.0615186
Tb427-110131300	0.864914	0.763362	-0.180189
Tb427-100088800	0.863272	0.692668	-0.317652
Tb427-040017700	0.862818	0.995643	0.206573
Tb427-110160100	0.861227	1.02726	0.254331
Tb427-030042200	0.85797	0.899905	0.0688442
Tb427-010023900	0.857851	1.05487	0.29827
Tb427-080029500	0.85664	1.05052	0.294349
Tb427-100136100	0.855949	0.670066	-0.353222
Tb427-050044600	0.855858	0.505371	-0.760027
Tb427-030043600	0.855023	0.964978	0.174533
Tb427-110184300	0.852966	1.07021	0.327339
Tb427-080022800	0.852911	0.545661	-0.64439
Tb427-110085200	0.850332	1.01723	0.258549
Tb427-060050100	0.849989	0.746962	-0.18641
Tb427-060052100	0.849084	1.02357	0.269627
Tb427-070042400	0.848789	1.3858	0.707238
Tb427-100117900	0.84766	1.10004	0.376001
Tb427-020032100	0.847358	1.16585	0.460341
Tb427-110066300	0.843328	0.852646	0.0158529
Tb427-110162200	0.843013	0.480227	-0.811837
Tb427-040024600	0.841863	1.0123	0.265978
Tb427-080067200	0.837563	0.967591	0.208199
Tb427-070078000	0.836208	0.526211	-0.66822
Tb427-110011700	0.835156	0.737671	-0.179069
Tb427-080066800	0.834527	0.784195	-0.0897451
Tb427-080040300	0.833244	0.819827	-0.0234204
Tb427-000731800	0.833119	0.787994	-0.0803377
Tb427-050017000	0.832564	0.972996	0.224873
Tb427-110180700	0.832047	0.745822	-0.157833
Tb427-030010800	0.831728	1.02522	0.301753
Tb427-030031900	0.831381	0.615673	-0.433346
Tb427-080013500	0.830569	1.05202	0.340988
Tb427-090028900	0.829682	0.774984	-0.0983931
Tb427-050016800	0.827605	0.831258	0.00635383
Tb427-080073600	0.826548	0.837892	0.019665
Tb427-110066200	0.825177	0.711561	-0.213717
Tb427-080027700	0.824714	0.639453	-0.367056
Tb427-090018600	0.823503	1.18207	0.521473
Tb427-110128000	0.822714	0.539196	-0.609581
Tb427-100133300	0.821947	0.900163	0.131142
Tb427-110099900	0.821194	0.635248	-0.370403
Tb427-070054700	0.819868	1.06233	0.373763
Tb427-050038800	0.8198	0.571458	-0.520625
Tb427-100155300	0.818755	0.713687	-0.198141
Tb427-100057700	0.818554	0.847455	0.0500585
Tb427-090088300	0.815651	1.02328	0.327175
Tb427-100068600:pseudogene	0.814631	0.710914	-0.196471
Tb427-080040700	0.814039	0.843173	0.0507314
Tb427-040040800	0.81039	0.873894	0.108841
Tb427-110070000	0.809343	0.992284	0.294002
Tb427-110124600	0.807062	0.978218	0.277477
Tb427-090016200	0.806642	0.883899	0.131952
Tb427-070031500	0.806327	0.893116	0.147483
Tb427-100014600	0.806291	0.917126	0.185818
Tb427-110029900	0.805793	1.09177	0.438187
Tb427-040021600	0.804031	0.592393	-0.440697
Tb427-060051100	0.803929	0.653338	-0.299238
Tb427-090056100	0.803085	0.93863	0.225003
Tb427-100152600	0.802326	0.74154	-0.113664
Tb427-100144500	0.802147	0.751092	-0.0948762
Tb427-110145600	0.801693	0.946303	0.239252
Tb427-060023000	0.801516	0.814733	0.0235971
Tb427-020016800	0.801331	1.0626	0.407133
Tb427-080037000	0.800913	0.772142	-0.05278
Tb427-110026200	0.799137	0.625362	-0.353753
Tb427-080061200	0.798343	0.631999	-0.337086
Tb427-100162200	0.797539	0.712022	-0.163633
Tb427-110030300	0.79646	0.743991	-0.0983158
Tb427-090071400	0.795972	1.07416	0.432421
Tb427-080052900	0.795945	0.771405	-0.0451792
Tb427-090024400	0.79572	0.992616	0.318974
Tb427-030054100	0.793304	0.508565	-0.641441
Tb427-010020500	0.791988	0.629539	-0.331181
Tb427-040052400	0.791963	1.12589	0.507566
Tb427-100145900	0.791404	0.997608	0.33406
Tb427-050005600	0.789759	0.837446	0.0845843
Tb427-070052900	0.789348	1.19445	0.597608
Tb427-100018900	0.789246	0.800508	0.0204415
Tb427-110150300	0.789124	0.865414	0.133138
Tb427-070049600	0.788032	0.655542	-0.265566
Tb427-080085200	0.78612	0.686582	-0.195318
Tb427-100120400	0.784464	0.732491	-0.0988972
Tb427-090088500	0.783787	0.902484	0.20344
Tb427-110011800	0.783134	0.663913	-0.238266
Tb427-110101800	0.782021	0.760982	-0.0393447
ND1	0.781692	0.713686	-0.131311
Tb427-110151400	0.780911	0.605303	-0.367502
Tb427-090031400	0.779818	0.902447	0.210705
Tb427-040040600	0.779064	0.666039	-0.226135
Tb427-110040000	0.778629	0.77828	-0.000646686
Tb427-100133900:pseudogene	0.778237	0.72964	-0.093024
Tb427-030033600	0.7769	0.794489	0.0322985
Tb427-110063600	0.776139	0.918738	0.243338
Tb427-110055500	0.775773	0.90402	0.22072
Tb427-080048100	0.774425	0.680256	-0.187047
Tb427-110105500	0.77329	0.909719	0.23441
Tb427-090081800	0.772673	0.436908	-0.822528
Tb427-110053300	0.772021	0.881136	0.190725
Tb427-000075100	0.769816	0.849127	0.141467
Tb427-050023900	0.769232	0.80456	0.0647806
Tb427-100089600	0.768084	0.493846	-0.637204
Tb427-110015400	0.766903	0.745433	-0.0409662
Tb427-100081000	0.766624	0.593662	-0.368877
Tb427-080066600	0.765925	0.927702	0.276458
Tb427-110028500	0.765545	0.779523	0.026104
Tb427-100024800	0.764653	1.01845	0.413494
Tb427-060040400	0.763827	0.829482	0.118964
Tb427-020026400	0.763462	0.557942	-0.452439
Tb427-100014700	0.762154	0.894768	0.231431
Tb427-090082700	0.761957	0.549098	-0.472647
Tb427-030037300	0.760781	0.49308	-0.62566
Tb427-110163900	0.759385	0.796463	0.0687765
Tb427-100153600	0.758718	0.671502	-0.176171
Tb427-060051900	0.758084	0.58077	-0.384391
Tb427-110022100	0.756821	0.691486	-0.130252
Tb427-110183600	0.755408	1.01527	0.42653
Tb427-110028900	0.753416	0.657174	-0.197171
Tb427-110029600	0.75268	0.85126	0.177563
Tb427-100127700	0.751349	0.72358	-0.0543317
Tb427-040043200	0.748886	0.996037	0.411452
Tb427-080027800	0.747296	0.80707	0.111014
Tb427-100108100	0.746327	0.604983	-0.302912
Tb427-080009300	0.745369	1.02967	0.46616
Tb427-090007300	0.744645	0.854552	0.198615
Tb427-080073800	0.744607	0.920969	0.306673
Tb427-050026100	0.743222	0.821143	0.14384
Tb427-050037700	0.74186	0.834777	0.170243
Tb427-020020100	0.74147	0.852831	0.201871
Tb427-100031800	0.739996	0.680872	-0.120133
Tb427-040029900	0.735562	0.932928	0.342919
Tb427-020027400	0.732625	0.650072	-0.172476
Tb427-040020700	0.729741	0.786201	0.107513
Tb427-100130000	0.728997	0.709451	-0.0392095
Tb427-100069500	0.728284	0.501137	-0.539297
Tb427-060025300	0.727795	0.628613	-0.21136
Tb427-090036200	0.727726	0.641383	-0.182208
Tb427-110104700	0.727632	0.514859	-0.499032
Tb427-090043100	0.727511	0.718535	-0.0179094
Tb427-030013500	0.727129	0.483141	-0.589765
Tb427-090065400	0.726845	0.680102	-0.0958972
Tb427-090055900	0.725199	0.941837	0.377101
Tb427-090012200	0.725023	0.824723	0.185882
Tb427-110108200	0.724944	1.02554	0.500447
Tb427-080007300	0.724038	0.898503	0.311458
Tb427-110047200	0.723602	0.713584	-0.0201141
Tb427-020031100	0.722873	0.736642	0.0272214
Tb427-030046000	0.722786	0.621608	-0.217563
Tb427-070078500	0.721988	0.877361	0.281196
Tb427-110118600	0.720325	0.508338	-0.50286
Tb427-110104400	0.719898	0.455254	-0.66112
Tb427-060049000	0.716605	0.662153	-0.114014
Tb427-070053500	0.716559	0.624693	-0.197937
Tb427-100168700	0.715884	0.779572	0.122955
Tb427-030053200:pseudogene	0.715081	0.765718	0.0987063
Tb427-030045000	0.713525	0.658045	-0.116778
Tb427-110014500	0.713245	0.654579	-0.123829
Tb427-080031200	0.712992	0.912095	0.355297
Tb427-070072900	0.712842	1.14477	0.683404
Tb427-070073000	0.712592	1.1101	0.639537
Tb427-010016100	0.7116	1.11601	0.649207
Tb427-100116700	0.711405	0.610991	-0.219519
Tb427-110035000	0.710907	0.748029	0.073433
Tb427-010023800	0.710788	0.920885	0.373602
Tb427-090011600	0.708952	0.836633	0.238906
Tb427-110134000	0.707639	0.601068	-0.235484
Tb427-000014800	0.706692	0.394936	-0.839461
Tb427-070039000	0.705422	0.769009	0.124513
Tb427-090025700	0.705184	0.623157	-0.178404
Tb427-110100100	0.704702	0.503843	-0.484038
Tb427-110085400	0.704537	0.97904	0.474692
Tb427-110082300	0.70354	0.765711	0.122167
Tb427-060045000	0.702282	0.576603	-0.284474
Tb427-020021300	0.701876	0.680532	-0.044553
Tb427-110161200	0.700224	0.466419	-0.586191
Tb427-100105600	0.69928	0.925476	0.404325
Tb427-040052100:pseudogene	0.697999	0.436788	-0.676291
Tb427-060009700	0.697745	0.653868	-0.0937017
Tb427-110075700	0.69668	0.664287	-0.0686888
Tb427-090008400	0.695534	0.700291	0.00983272
Tb427-040026300	0.695346	0.71927	0.048803
Tb427-100034100	0.694531	0.613216	-0.179642
Tb427-070082800	0.694152	0.529559	-0.39046
Tb427-040011900	0.693913	0.995593	0.5208
Tb427-090070400	0.692974	0.989458	0.513837
Tb427-060009600	0.692343	0.662995	-0.0624883
Tb427-030018700	0.692086	0.709384	0.0356161
Tb427-070032300	0.691958	0.778702	0.170387
Tb427-090032800	0.691285	0.675953	-0.0323569
Tb427-110043300	0.690921	0.712743	0.0448606
Tb427-060008300	0.690589	1.28572	0.89668
Tb427-100007300	0.689878	0.870845	0.336074
Tb427-090065300	0.689272	0.654918	-0.0737599
Tb427-110159500	0.687611	0.995482	0.533803
Tb427-100006100	0.685848	0.666187	-0.0419636
Tb427-040022800	0.685511	0.723439	0.0776919
Tb427-100056600	0.685035	0.861645	0.330915
Tb427-100148700	0.684758	0.429323	-0.673533
Tb427-100160400	0.684342	0.595551	-0.200494
Tb427-090065500	0.683449	0.741248	0.117121
Tb427-100151000	0.68282	1.10165	0.690085
Tb427-110188000	0.68185	0.821237	0.268345
Tb427-110016000	0.681526	0.567869	-0.26321
Tb427-110027500	0.681215	0.71765	0.0751701
Tb427-110016800	0.681196	0.922658	0.437726
Tb427-000018400	0.680985	0	-Inf
Tb427-090084100	0.680739	0.843212	0.308793
Tb427-100074000	0.679551	0.735995	0.115115
Tb427-110018700	0.679158	0.694542	0.0323134
Tb427-070029600	0.678996	0.565843	-0.263003
Tb427-090058200	0.678519	1.19397	0.815309
Tb427-100040000	0.678255	0.596863	-0.184428
Tb427-100071700	0.676746	0.634162	-0.0937615
Tb427-080085900	0.676528	0.687735	0.0237037
Tb427-100087200	0.676227	0.586447	-0.205506
Tb427-110042800	0.676222	0.739051	0.128176
Tb427-080072100	0.675053	0.763315	0.177277
Tb427-100140700	0.674905	0.906899	0.426259
Tb427-090028800	0.674904	1.02911	0.608642
Tb427-040042900	0.673673	0.68604	0.0262445
Tb427-040021100	0.67315	0.831206	0.304277
Tb427-050051300	0.672856	0.765036	0.185229
Tb427-090089200	0.672348	0.837172	0.316314
Tb427-060014500	0.67191	0.793393	0.239768
Tb427-110018300	0.671749	0.672317	0.00121816
Tb427-040022600	0.671003	0.498435	-0.428915
Tb427-100161700	0.669724	0.752467	0.168062
Tb427-100104300	0.669716	0.629067	-0.090336
Tb427-110105400	0.669169	0.702013	0.069126
Tb427-110145300	0.668217	0.448182	-0.576231
Tb427-110082500	0.667844	0.73451	0.137271
Tb427-070072400	0.667718	0.798091	0.257314
Tb427-040022300	0.667718	0.625821	-0.0934893
Tb427-100085400	0.66762	0.610798	-0.128331
Tb427-090011400	0.666886	0.72585	0.122231
Tb427-100077200	0.666534	0.484581	-0.45994
Tb427-050012400	0.665255	0.718462	0.111003
Tb427-040018800	0.664496	0.555728	-0.257881
Tb427-030023900	0.664291	0.399719	-0.73283
Tb427-110086200	0.663812	0.654941	-0.0194099
Tb427-100065000	0.663517	0.454083	-0.547177
Tb427-010013900	0.663222	0.680813	0.0377663
Tb427-100064500	0.663193	0.44535	-0.574488
Tb427-090029800	0.663061	0.437196	-0.60086
Tb427-110138100	0.663053	1.26128	0.927691
Tb427-100028000	0.662598	0.546199	-0.278708
Tb427-090014500	0.662438	0.597234	-0.149489
Tb427-080031600	0.660953	0.68837	0.0586371
Tb427-090056500	0.660696	0.81009	0.294095
Tb427-070012600	0.660591	0.676482	0.0342949
Tb427-080065700	0.660562	0.820973	0.313642
Tb427-080073500	0.660534	0.877769	0.410209
Tb427-090012600	0.659848	0.748623	0.182106
Tb427-030057200	0.659671	0.737579	0.161051
Tb427-020017500	0.659326	0.369889	-0.833899
Tb427-110038700	0.65904	0.558735	-0.238201
Tb427-110120700	0.658591	0.787639	0.258151
Tb427-110069300	0.658316	0.631141	-0.0608173
Tb427-110183200	0.657872	0.860615	0.387562
Tb427-100150100	0.657454	0.579023	-0.18327
Tb427-020020000	0.657334	0.708139	0.107405
Tb427-110149600	0.657165	0.768427	0.225652
Tb427-030056900	0.656968	0.392074	-0.744697
Tb427-100017800	0.656517	0.811791	0.306275
Tb427-060013300	0.656163	0.352398	-0.896849
Tb427-100038800	0.656103	0.868369	0.404386
Tb427-100156000	0.655656	0.842918	0.362454
Tb427-090011500	0.655612	0.568082	-0.206742
Tb427-050021000	0.653671	0.598106	-0.128163
Tb427-090089600	0.65363	0.85621	0.38949
Tb427-080077400	0.653475	0.679167	0.0556337
Tb427-060010400	0.652595	0.548841	-0.249801
Tb427-110031600	0.652457	0.615006	-0.0852837
Tb427-110159000	0.652242	0.552706	-0.238896
Tb427-110049900	0.651973	0.817594	0.326572
Tb427-110013000	0.65197	0.728708	0.160536
Tb427-110023100	0.651646	0.654616	0.0065589
Tb427-110129200	0.651514	0.563095	-0.210418
Tb427-070026300	0.650986	0.456731	-0.511282
Tb427-050030200	0.650976	0.773148	0.248142
Tb427-110015000	0.650214	0.866752	0.414704
Tb427-110085600	0.650199	0.613174	-0.0845851
Tb427-030058400	0.650145	0.706613	0.120157
Tb427-110166800	0.646263	0.953185	0.560634
Tb427-100144100	0.646163	0.629667	-0.0373101
Tb427-080050100	0.645897	0.574047	-0.170134
Tb427-050040500	0.645229	0.629896	-0.0346974
Tb427-100040200	0.644673	0.6201	-0.0560663
Tb427-110147000	0.641819	0.47354	-0.438681
Tb427-030032600	0.641128	0.825737	0.36507
Tb427-110057000	0.640618	0.415824	-0.62349
Tb427-100134100	0.640334	0.937227	0.549575
Tb427-080056400	0.640233	0.909272	0.506116
Tb427-100041000	0.640115	0.799387	0.320563
Tb427-040012700	0.638671	0.591964	-0.109566
Tb427-100157900	0.638585	0.507174	-0.332397
Tb427-110007700	0.636701	0.430097	-0.565952
Tb427-110033500	0.635995	0.759111	0.255296
Tb427-070072800	0.635543	0.912165	0.521306
Tb427-100077400	0.635332	0.377537	-0.750892
Tb427-060011900	0.634474	0.635018	0.00123614
Tb427-080029800	0.633783	0.593015	-0.0959219
Tb427-100037000	0.633327	0.750156	0.24424
Tb427-050051600	0.633325	0.435584	-0.539995
Tb427-110054200	0.632651	0.683173	0.110842
Tb427-040024200	0.632322	0.856273	0.437411
Tb427-110045200	0.631579	0.701708	0.151908
Tb427-110036400	0.631034	0.687813	0.124298
Tb427-070072300	0.630359	0.815581	0.371655
Tb427-110048200	0.630186	0.783727	0.314572
Tb427-100131300	0.629899	0.722355	0.197588
Tb427-090062400	0.629767	0.389666	-0.692578
Tb427-100153000	0.628943	0.499853	-0.331426
Tb427-040006800	0.627758	0.491914	-0.351803
Tb427-000811300	0.627063	0.824503	0.394915
Tb427-110127800	0.62695	0.763764	0.284777
Tb427-080057900	0.626889	0.730984	0.221631
Tb427-100087000	0.626568	0.554056	-0.177441
Tb427-060030400	0.626213	1.12296	0.842578
Tb427-030029600	0.624163	0.537727	-0.215048
Tb427-020027500	0.623097	0.556743	-0.162445
Tb427-010019900	0.622251	0.369527	-0.751819
Tb427-030050200	0.621113	0.505267	-0.29781
Tb427-100165600	0.620533	0.620208	-0.00075733
Tb427-100162700	0.620397	0.857208	0.466453
Tb427-100057600	0.620127	0.521629	-0.249538
Tb427-020019600	0.619448	0.489706	-0.339067
Tb427-080029400	0.619102	0.680448	0.136309
Tb427-110035800	0.618352	0.651779	0.0759552
Tb427-090057300	0.617577	0.622085	0.0104917
Tb427-100119600	0.616929	0.803068	0.380417
Tb427-030024500	0.616324	0.855019	0.472267
Tb427-110140900	0.616211	0.593523	-0.0541201
Tb427-110099500	0.616055	0.629319	0.0307315
Tb427-070011000	0.615988	0.724898	0.234876
Tb427-100054400	0.615684	0.605419	-0.0242559
Tb427-040006600	0.615158	0.546837	-0.169847
Tb427-110093900	0.614822	0.543778	-0.177151
Tb427-060049900	0.613835	0.480179	-0.354278
Tb427-110135400	0.612863	0.452731	-0.43691
Tb427-060010600	0.612555	0.796745	0.37928
Tb427-100154400	0.612161	0.565291	-0.114916
Tb427-110035300	0.611199	0.493733	-0.307913
Tb427-090054500	0.611047	0.662195	0.115972
Tb427-080080100	0.60981	0.779762	0.354674
Tb427-040021000	0.60912	0.7307	0.262554
Tb427-100159900	0.609086	0.676218	0.150844
Tb427-100033700	0.608842	0.428116	-0.508068
Tb427-020021600	0.608644	0.366664	-0.731138
Tb427-100104800	0.608013	0.786535	0.371408
Tb427-000245800:pseudogene	0.607846	0.731913	0.267968
Tb427-100170800	0.607561	0.532552	-0.190108
Tb427-030017600	0.607132	0.683515	0.170963
Tb427-060012900	0.606854	0.644872	0.0876637
Tb427-100072500	0.606838	0.472626	-0.360613
Tb427-100171800	0.60631	0.407069	-0.574783
Tb427-110182400	0.606248	0.711376	0.230706
Tb427-110062300	0.60593	0.761022	0.328787
Tb427-110132400	0.604742	0.486723	-0.313218
Tb427-090024800	0.604166	0.438932	-0.460946
Tb427-060054700	0.603825	0.467025	-0.37063
Tb427-100051700	0.603295	0.483085	-0.320586
Tb427-110110200	0.602825	0.619386	0.0390988
Tb427-100053700	0.602629	0.432507	-0.478547
Tb427-020023400	0.600948	0.610952	0.0238175
Tb427-030009600	0.6005	0.571519	-0.0713627
Tb427-090030600	0.600418	0.574656	-0.0632676
Tb427-100027800:pseudogene	0.600058	0.8781	0.549284
Tb427-080043700:pseudogene	0.598908	0.693992	0.212586
Tb427-050037500	0.598752	0.696908	0.21901
Tb427-110006200	0.598265	0.379844	-0.655379
Tb427-100018500	0.597945	0.469097	-0.350126
Tb427-040009600	0.597436	0.541491	-0.141847
Tb427-100084700	0.59725	0.476343	-0.326335
Tb427-080042500	0.595978	0.432309	-0.463195
Tb427-080026300:pseudogene	0.594209	0.489612	-0.279331
Tb427-110049300	0.593863	0.706427	0.250411
Tb427-100136800	0.593591	0.634881	0.0970178
Tb427-030016500	0.592868	0.50489	-0.231741
Tb427-080012000	0.591542	0.696253	0.235129
Tb427-110162500	0.591475	0.471242	-0.32785
Tb427-110018800	0.590729	0.667858	0.177046
Tb427-070073100	0.59036	0.812964	0.461597
Tb427-050017700	0.589897	0.423342	-0.47864
Tb427-030013400	0.588789	0.69056	0.230015
Tb427-110059500	0.588448	0.454634	-0.372211
Tb427-090080400	0.587911	0.475473	-0.306235
Tb427-080011500	0.586816	0.936825	0.674871
Tb427-050043500	0.58677	0.62782	0.0975543
Tb427-110129700	0.585806	0.387612	-0.595808
Tb427-010020100	0.585022	0.667411	0.190085
Tb427-100057900	0.584297	0.482881	-0.275034
Tb427-110093600	0.58377	0.506655	-0.204398
Tb427-090046700	0.582946	0.627391	0.106003
Tb427-100050500	0.582895	0.369882	-0.656169
Tb427-110070500	0.582715	0.790088	0.439223
Tb427-100072900	0.58233	0.588583	0.0154084
Tb427-070069100	0.58228	0.999645	0.779703
Tb427-050050200:pseudogene	0.582081	0.483305	-0.268285
Tb427-050030300	0.581859	0.70053	0.267777
Tb427-090054700	0.581766	0.451567	-0.365499
Tb427-110089100	0.581372	0.563089	-0.0460983
Tb427-010011900	0.581244	0.772709	0.410782
Tb427-090036800	0.580534	0.724717	0.320036
Tb427-080067300	0.580482	0.797878	0.458917
Tb427-020015600	0.580398	0.784857	0.435385
Tb427-110068200	0.580365	0.778337	0.423434
Tb427-110159800	0.58025	0.462026	-0.3287
Tb427-030014700	0.578709	1.00193	0.79187
Tb427-080050800	0.578692	0.722531	0.320264
Tb427-100124000	0.578382	0.466829	-0.309129
Tb427-100017200:pseudogene	0.577922	0.369459	-0.645458
Tb427-100167100	0.576849	0.527382	-0.129344
Tb427-020018900	0.576479	0.661616	0.198726
Tb427-050038900	0.576311	0.43264	-0.41368
Tb427-100085500	0.576271	0.496287	-0.215573
Tb427-010022300	0.575628	0.841951	0.548599
Tb427-060049300	0.575316	0.75186	0.386109
Tb427-100083400	0.574886	0.526028	-0.128137
Tb427-030041300	0.574353	0.401531	-0.516424
Tb427-110006500	0.574235	0.478755	-0.262353
Tb427-090063000	0.573692	0.904221	0.656399
Tb427-110145200	0.57364	0.407712	-0.492594
Tb427-080068000	0.573022	0.579545	0.0163303
Tb427-080084100	0.572829	0.792221	0.467797
Tb427-100043900	0.572656	1.04961	0.874118
Tb427-000286900	0.572571	0.57073	-0.00464536
Tb427-080008300	0.571558	0.644902	0.174178
Tb427-110056900	0.5714	0.420056	-0.443918
Tb427-110038900	0.57111	0.382608	-0.577899
Tb427-110149700	0.571003	0.524928	-0.121378
ND4	0.570139	0.953797	0.742367
Tb427-060036600	0.569913	0.589633	0.0490744
Tb427-050031400	0.569608	0.476377	-0.257866
Tb427-030024800	0.567626	0.6538	0.203907
Tb427-110164300	0.567157	0.596922	0.0737934
Tb427-060010300	0.567139	0.959329	0.758322
Tb427-080028600	0.565637	0.548494	-0.0444019
Tb427-020007800	0.565015	0.585846	0.0522328
Tb427-080088300	0.564984	0.532474	-0.0855006
Tb427-040050800	0.564437	0.630627	0.159973
Tb427-110039500	0.564244	0.73372	0.378911
Tb427-110164400	0.563998	0.739529	0.390917
Tb427-080011900	0.563885	0.502924	-0.165061
Tb427-110017200	0.563381	0.464845	-0.277362
Tb427-090043000	0.562797	0.618896	0.137081
Tb427-100165400	0.562271	0.622697	0.147264
Tb427-080019600	0.561954	0.544563	-0.0453526
Tb427-090063600	0.561906	0.429136	-0.388895
Tb427-050029400	0.561543	0.504697	-0.15398
Tb427-110082200	0.561436	0.714566	0.347944
Tb427-070065500	0.561339	0.864732	0.623382
Tb427-060019600:pseudogene	0.560991	0.374956	-0.581256
Tb427-100170600	0.560849	0.645596	0.20302
Tb427-040019100	0.560443	0.571377	0.0278752
Tb427-110127700	0.560411	0.537659	-0.0597919
Tb427-080086000	0.559946	0.44086	-0.344966
Tb427-070036100	0.55984	0.534862	-0.065847
Tb427-110135500	0.559746	0.683153	0.287437
Tb427-040048000	0.55961	0.558361	-0.00322352
Tb427-070016200	0.559276	0.417423	-0.422049
Tb427-110189600	0.558885	0.776703	0.474812
Tb427-080060100	0.558678	0.625329	0.162599
Tb427-110087400:pseudogene	0.557568	0.357251	-0.642208
Tb427-080026900	0.556864	0.465704	-0.257914
Tb427-060031500	0.556714	0.458953	-0.27859
Tb427-110165200	0.556518	0.451757	-0.300884
Tb427-010012300	0.556414	0.382293	-0.541482
Tb427-070041600	0.555885	0.455152	-0.288439
Tb427-080057300	0.554942	0.373901	-0.569679
Tb427-110134300	0.554618	0.535097	-0.0516931
Tb427-110151800	0.554588	0.489385	-0.180444
Tb427-110033900	0.554033	0.555064	0.00268194
Tb427-090048600	0.553311	0.582707	0.0746799
Tb427-110056300	0.551702	0.559469	0.0201677
Tb427-080076100	0.55131	0.715902	0.376899
Tb427-070081000	0.55078	0.504481	-0.126677
Tb427-020018700	0.549822	0.461247	-0.253424
Tb427-070021000:pseudogene	0.549706	0.588601	0.0986314
Tb427-090072700	0.54967	1.02403	0.897627
Tb427-110037400	0.549092	0.606578	0.143645
Tb427-110178600	0.54888	0.502374	-0.12773
Tb427-100153400	0.548788	0.406153	-0.434224
Tb427-020008700	0.548327	0.495542	-0.14603
Tb427-070073700	0.548312	0.610581	0.155185
Tb427-100017700	0.54712	0.412461	-0.407601
Tb427-070017400	0.54687	0.557915	0.0288471
Tb427-110098500	0.546841	0.394467	-0.471216
Tb427-110186500	0.546206	0.477987	-0.192474
Tb427-060036100	0.5459	0.47601	-0.197645
Tb427-020031700	0.5458	0.61278	0.166996
Tb427-100026700	0.545657	0.878187	0.686534
Tb427-080023200	0.544842	0.581252	0.0933251
Tb427-030020200	0.544788	0.597053	0.132164
Tb427-110146600	0.544136	0.649057	0.254377
Tb427-050035900	0.544023	0.554294	0.0269834
Tb427-100059200	0.544005	0.325119	-0.742649
Tb427-100086500	0.543699	0.490207	-0.149417
Tb427-110037900	0.543633	0.723631	0.41262
Tb427-110150700	0.543216	0.481632	-0.173596
Tb427-070041500	0.542685	0.420027	-0.369632
Tb427-110182300	0.542328	0.556118	0.0362261
Tb427-110027400	0.541602	0.775758	0.518373
Tb427-100162000	0.541229	0.687787	0.345723
Tb427-020023700	0.541058	0.683529	0.337221
Tb427-110027900	0.540743	0.466266	-0.213789
Tb427-060029800	0.540316	0.644345	0.254028
Tb427-110072300	0.540276	0.288831	-0.903471
Tb427-110053700	0.539888	0.323021	-0.74103
Tb427-110040900	0.539677	0.391018	-0.46486
Tb427-060020500	0.539108	0.729108	0.435558
Tb427-060011600	0.538244	0.384825	-0.48406
Tb427-030051000	0.537786	0.563985	0.0686249
Tb427-100104500	0.536327	0.57173	0.0922203
Tb427-080088900	0.536297	0.670278	0.321728
Tb427-060009900	0.536286	0.563303	0.0709075
Tb427-070074200	0.536106	0.594632	0.14948
Tb427-100044000	0.535219	0.774552	0.533231
Tb427-090036600	0.534452	0.690605	0.369798
Tb427-050025300	0.533982	0.499475	-0.096379
Tb427-050036300	0.533916	0.469311	-0.186069
Tb427-110050800	0.533511	0.631683	0.243683
Tb427-050026500:pseudogene	0.533388	0.521389	-0.0328241
Tb427-110104600	0.533251	0.447091	-0.254246
Tb427-020017600	0.533228	0.502717	-0.0850054
Tb427-060043700	0.532638	0.520974	-0.0319454
Tb427-010014500	0.5325	0.84271	0.662254
Tb427-000811400	0.532333	0.627984	0.2384
Tb427-080041600	0.532155	0.492321	-0.112245
Tb427-050024500	0.532149	0.622952	0.227289
Tb427-100122100	0.531775	0.569582	0.0990879
Tb427-090090100	0.531547	0.71697	0.431716
Tb427-100165100	0.531329	0.50714	-0.0672199
Tb427-100037300	0.530887	0.579889	0.12737
Tb427-090039000	0.530693	0.591638	0.156839
Tb427-100044200	0.530597	0.601867	0.181827
Tb427-110012200	0.530344	0.620355	0.226166
Tb427-030029900	0.530334	0.897958	0.759746
Tb427-080045900	0.530329	0.54966	0.0516506
Tb427-090069500	0.530302	0.378707	-0.485732
Tb427-110158500	0.529261	0.55624	0.07173
Tb427-100143600:pseudogene	0.528281	0.413706	-0.352703
Tb427-060026600:pseudogene	0.52819	0.482275	-0.131202
Tb427-040017800	0.528102	0.587452	0.153654
Tb427-100073000	0.527933	0.428195	-0.302086
Tb427-000772200	0.527839	0.722348	0.452598
Tb427-080066300	0.527136	0.438992	-0.263981
Tb427-090075000	0.526854	0.675586	0.358736
Tb427-100012000	0.526779	0.573259	0.12199
Tb427-070028200	0.525969	0.597367	0.183641
Tb427-090063300	0.52582	0.833829	0.665182
Tb427-100058000	0.525525	0.451917	-0.217703
Tb427-070052400	0.525284	0.809879	0.62461
Tb427-100051900	0.524755	0.56886	0.116428
Tb427-110045900	0.524721	0.576383	0.13548
Tb427-090030200	0.524358	0.59498	0.18229
Tb427-070059100	0.524336	0.924792	0.818637
Tb427-100156100	0.524334	0.51799	-0.0175611
Tb427-100101800	0.523928	0.709751	0.437944
Tb427-110132000	0.523772	0.519385	-0.0121348
Tb427-080032800	0.522874	0.393213	-0.411153
Tb427-100105500	0.522475	0.479894	-0.122645
Tb427-060046700	0.52213	0.507283	-0.0416163
Tb427-040052300	0.522063	0.607675	0.219075
Tb427-070072200	0.522063	0.484847	-0.106693
Tb427-040048800	0.521831	0.589081	0.174883
Tb427-100110100	0.521292	0.427633	-0.285719
Tb427-030030600	0.520932	0.456261	-0.191234
Tb427-090024500	0.520738	0.443305	-0.232259
Tb427-100153900	0.520731	0.571105	0.133219
Tb427-050031200	0.520397	0.887495	0.770126
Tb427-060033900	0.520292	0.506311	-0.0392969
Tb427-110045500	0.519698	0.464473	-0.162078
Tb427-080085500	0.519434	0.403162	-0.365584
Tb427-110019000	0.518823	0.666914	0.362259
Tb427-040030000	0.518314	0.551822	0.090376
Tb427-040030500:pseudogene	0.518021	0.649954	0.327328
Tb427-110059600	0.517945	0.40618	-0.350681
Tb427-110027800	0.517497	0.40282	-0.361417
Tb427-110181600	0.517116	0.950648	0.878424
Tb427-070022200	0.516787	0.329064	-0.651198
Tb427-100026900	0.516731	0.419095	-0.302136
Tb427-080010700	0.516686	0.379361	-0.445714
Tb427-070025400	0.515894	0.792499	0.619333
Tb427-070055700	0.515837	0.656118	0.347041
Tb427-100110600	0.515466	0.456741	-0.174502
Tb427-080085600	0.515108	0.439492	-0.229037
Tb427-080040400	0.514361	0.324977	-0.662443
Tb427-110135100	0.513799	0.364516	-0.495222
Tb427-080084200	0.513467	0.503902	-0.0271285
Tb427-060055800	0.513269	0.469672	-0.128062
Tb427-030048500	0.512953	0.372924	-0.459945
Tb427-100058600	0.512782	0.57814	0.173075
Tb427-060018200	0.512715	0.768196	0.583315
Tb427-100095700	0.512561	0.629816	0.297209
Tb427-090085100	0.512427	0.698068	0.446021
Tb427-060048800	0.511911	0.411505	-0.314985
Tb427-110131400	0.511878	0.600569	0.230529
Tb427-030053600	0.511818	0.483875	-0.0809975
Tb427-080026200	0.510964	0.356854	-0.517887
Tb427-070014200	0.510577	0.637738	0.320836
Tb427-110041300	0.51044	0.692984	0.44108
Tb427-050022300	0.509768	0.739983	0.53765
Tb427-110139100	0.509731	0.577598	0.180331
Tb427-060032500	0.50959	0.477136	-0.0949336
Tb427-100038400	0.509106	0.670661	0.397619
Tb427-100018700	0.508707	0.697585	0.455535
Tb427-030017700	0.508404	0.351299	-0.533278
Tb427-100157800	0.508216	0.602651	0.24588
Tb427-070049000	0.508149	0.441488	-0.202875
Tb427-090053900	0.50761	0.566344	0.157956
Tb427-100086800	0.507516	0.48142	-0.0761565
Tb427-030058600	0.507344	0.391336	-0.374558
Tb427-040037600	0.507316	0.443008	-0.19555
Tb427-070029900	0.506913	0.506287	-0.00178214
Tb427-070077600	0.506637	0.590381	0.220694
Tb427-080087600	0.506182	0.35098	-0.528266
Tb427-070050200	0.50603	0.39967	-0.340411
Tb427-110027600	0.505753	0.393652	-0.361513
Tb427-060033600	0.505251	0.564479	0.15992
Tb427-100070700	0.503922	0.571062	0.180447
Tb427-100011500	0.5039	0.563853	0.162182
Tb427-110128300	0.503382	0.559548	0.152606
Tb427-080011200	0.503361	0.527396	0.0672941
Tb427-030048400	0.502707	0.798771	0.668066
Tb427-110055600	0.502286	0.855112	0.767605
Tb427-110143100	0.502271	0.576622	0.19916
Tb427-040032900	0.502223	0.497474	-0.0137066
Tb427-110121500	0.501866	0.653131	0.380071
Tb427-110018400	0.50176	0.573059	0.191688
Tb427-110014200	0.50152	0.410661	-0.288359
Tb427-060029100	0.501447	0.511047	0.0273606
Tb427-100079300	0.50124	0.687344	0.455531
ND5	0.501132	0.913287	0.865877
Tb427-070037300	0.500666	0.536923	0.100868
Tb427-110046500	0.500489	0.342291	-0.548116
Tb427-060014200	0.500475	0.272657	-0.876212
Tb427-020030400	0.500105	0.49588	-0.0122402
Tb427-110068700	0.499701	0.435823	-0.197323
Tb427-030006600	0.499598	0.455299	-0.133955
Tb427-100094600	0.4995	0.448657	-0.154872
Tb427-110069600	0.499015	0.463523	-0.10644
Tb427-100158200	0.498778	0.529289	0.0856571
Tb427-110063300	0.498774	0.418521	-0.253087
Tb427-000833400	0.49832	0.479463	-0.0556528
Tb427-040047800	0.498189	0.443595	-0.16745
Tb427-090060100	0.498147	0.593559	0.25282
Tb427-040036600	0.498081	0.335251	-0.571141
Tb427-040018600	0.49769	0.392219	-0.343585
Tb427-000655300:pseudogene	0.497606	0.405282	-0.296075
Tb427-080069000	0.497577	0.572027	0.201164
Tb427-080040800	0.497543	0.59967	0.269348
Tb427-080059900	0.497132	0.55296	0.153547
Tb427-100043800	0.496937	0.507499	0.0303415
Tb427-010030200	0.496926	0.4792	-0.0524037
Tb427-100154300	0.496591	0.700803	0.496951
Tb427-110151600	0.496461	0.425533	-0.222409
Tb427-110082400	0.496446	0.444996	-0.157843
Tb427-050030400	0.49598	0.462595	-0.100532
Tb427-070077300	0.495613	0.531252	0.100181
Tb427-100029600	0.494867	0.50675	0.0342339
Tb427-080053300	0.494821	0.345883	-0.516622
Tb427-090056700	0.494524	0.704776	0.511125
Tb427-050016100	0.494297	0.476665	-0.0524025
Tb427-030057500	0.493522	0.329682	-0.58204
Tb427-090070700	0.493174	0.453619	-0.120614
Tb427-080012300	0.492936	0.582876	0.241787
Tb427-100157500	0.492722	0.554733	0.171022
Tb427-070037200	0.492522	0.537194	0.125255
Tb427-070036500	0.49238	0.530438	0.107413
Tb427-090069900	0.492368	0.370057	-0.41199
Tb427-100041700	0.491296	0.342516	-0.52042
Tb427-090015400	0.491216	0.391915	-0.325815
Tb427-030059700	0.491185	0.370817	-0.405561
Tb427-040028900	0.49035	0.603692	0.300002
Tb427-090080300	0.490349	0.471407	-0.0568344
Tb427-090022100	0.489793	0.50543	0.0453382
Tb427-020018600	0.489676	0.452995	-0.112332
Tb427-060016200	0.489605	0.513182	0.0678519
Tb427-040009400	0.488965	0.362315	-0.432484
Tb427-100114000	0.488599	0.384578	-0.345373
Tb427-110179800	0.488461	0.516707	0.0811039
Tb427-050009100	0.488449	0.768843	0.654481
Tb427-100092200	0.488422	0.508291	0.0575256
Tb427-030005800	0.488172	0.678936	0.475887
Tb427-090050700	0.487131	0.260079	-0.905361
Tb427-050036800	0.48696	0.462795	-0.0734302
Tb427-110124200	0.486792	0.44319	-0.135379
Tb427-100061100	0.48605	0.489247	0.00945991
Tb427-070030000	0.485532	0.454508	-0.0952604
Tb427-070042800	0.485425	0.533125	0.135226
Tb427-110100200	0.485312	0.442181	-0.134276
Tb427-080073400	0.485069	0.442263	-0.133286
Tb427-090050000	0.484944	0.261321	-0.891993
Tb427-060053000	0.484595	0.448941	-0.110254
Tb427-030020700	0.484555	0.352889	-0.457446
Tb427-110042600	0.483896	0.538172	0.153369
Tb427-110058500	0.483719	0.534489	0.143991
Tb427-100161600	0.483615	0.433148	-0.158999
Tb427-090081000	0.483438	0.316669	-0.610357
Tb427-050011800	0.482981	0.668214	0.468345
Tb427-100010600	0.482798	0.412953	-0.225443
Tb427-030056600	0.482769	0.406526	-0.247985
Tb427-100017500	0.482758	0.402296	-0.263042
Tb427-070016300	0.482752	0.434911	-0.150563
Tb427-100095900	0.482685	0.369535	-0.385373
Tb427-110008500	0.482593	0.65217	0.434442
Tb427-100032100	0.482161	0.287519	-0.745857
Tb427-100039800	0.48193	0.342527	-0.492609
Tb427-110087800	0.481742	0.475359	-0.0192436
Tb427-010014400	0.481565	0.63859	0.40716
Tb427-070076500	0.481317	0.253735	-0.923666
Tb427-100125300	0.480974	0.474463	-0.0196622
Tb427-040053600	0.480846	0.400622	-0.263332
Tb427-110007200	0.480822	0.296343	-0.698236
Tb427-080046300	0.48032	0.407103	-0.238601
Tb427-100088600	0.479655	0.452468	-0.0841821
Tb427-110039000	0.479595	0.41917	-0.19428
Tb427-110021200	0.479574	0.530888	0.146654
Tb427-060041600	0.47934	0.379263	-0.33785
Tb427-100042500	0.479187	0.338278	-0.502381
Tb427-000664500	0.47918	0.610716	0.349934
Tb427-000840600:pseudogene	0.479152	0.318165	-0.59071
Tb427-080053800	0.479104	0.574813	0.262753
Tb427-110108700	0.478679	0.437309	-0.130406
Tb427-070015900	0.478161	0.408372	-0.227613
Tb427-100153100	0.478077	0.417218	-0.196441
Tb427-040012900	0.478044	0.566637	0.245281
Tb427-090015000	0.477676	0.527713	0.143723
Tb427-110013600	0.477367	0.666543	0.481598
Tb427-110083700	0.477363	0.658283	0.46362
Tb427-080041000	0.476564	0.543943	0.190786
Tb427-110020100	0.476027	0.755001	0.665437
Tb427-090045700	0.475888	0.522117	0.133753
Tb427-020017000	0.475852	0.509797	0.0994113
Tb427-110040100	0.475803	0.449088	-0.0833647
Tb427-110030600	0.475733	0.436505	-0.124155
Tb427-070037500	0.475689	0.368823	-0.367089
Tb427-070034600	0.475662	0.590011	0.310806
Tb427-060052500:pseudogene	0.475213	0.721296	0.602019
Tb427-060042100	0.475169	0.346636	-0.455018
Tb427-070047300	0.475086	0.441096	-0.107096
Tb427-100038500	0.47469	0.673893	0.505536
Tb427-090089700	0.474311	0.468634	-0.017372
Tb427-030049700	0.474294	0.396024	-0.260194
Tb427-110068500	0.47427	0.407444	-0.219106
Tb427-100008900	0.474222	0.388948	-0.285986
Tb427-100054200	0.474196	0.661305	0.479832
Tb427-020008900	0.473691	0.535298	0.176394
Tb427-100163800	0.473416	0.404294	-0.227705
Tb427-100018000	0.4734	0.413428	-0.195423
Tb427-100167000	0.47339	0.462048	-0.0349846
Tb427-110062100	0.472955	0.330574	-0.516727
Tb427-030049400	0.47273	0.286229	-0.723847
Tb427-050023200	0.472585	0.509058	0.107255
Tb427-100079400	0.472451	0.461702	-0.0332045
Tb427-080084000	0.472187	0.793107	0.748157
Tb427-080065900	0.471562	0.459246	-0.0381806
Tb427-090046900	0.471164	0.384189	-0.294411
Tb427-100024300	0.471074	0.534056	0.181036
Tb427-100071000	0.470681	0.549932	0.224505
Tb427-050027300	0.470356	0.492494	0.0663536
Tb427-020013600	0.470055	0.396125	-0.246874
Tb427-110047000	0.469893	0.543	0.20862
Tb427-070050300	0.469854	0.461875	-0.0247107
Tb427-040006000	0.469768	0.289784	-0.696971
Tb427-110076600	0.469637	0.481972	0.0374041
Tb427-110188700	0.469061	0.495668	0.0795969
Tb427-110023600	0.468794	0.662245	0.498411
Tb427-100075200	0.468658	0.249592	-0.908962
Tb427-110074900	0.468652	0.584864	0.319584
Tb427-100161500	0.468304	0.380422	-0.299846
Tb427-010005800	0.467654	0.355172	-0.396921
Tb427-110081200	0.467476	0.268963	-0.797487
Tb427-100152700	0.467409	0.324487	-0.526526
Tb427-100017300	0.467373	0.364165	-0.359984
Tb427-070005500	0.467347	0.432308	-0.112437
Tb427-090054400	0.46726	0.361178	-0.371516
Tb427-110188100	0.466842	0.383512	-0.283664
Tb427-080074200	0.466387	0.392794	-0.247755
Tb427-100005300	0.466293	0.672655	0.528628
Tb427-080012500	0.466059	0.383582	-0.280976
Tb427-030049000	0.46594	0.568428	0.286835
Tb427-110076300	0.465822	0.448512	-0.0546323
Tb427-080068200	0.465757	0.411799	-0.177638
Tb427-100083500	0.465542	0.414317	-0.168175
Tb427-030042500	0.465492	0.538755	0.210871
Tb427-030060000	0.465398	0.725292	0.640095
Tb427-060009500	0.465249	0.492855	0.0831611
Tb427-100053900	0.46521	0.399033	-0.221374
Tb427-080047000	0.465172	0.502407	0.111093
Tb427-050041600	0.465137	0.380556	-0.289547
Tb427-110065500	0.464809	0.392126	-0.245321
Tb427-110141500	0.464751	0.371387	-0.323535
Tb427-110051900	0.464583	0.367326	-0.338876
Tb427-070076600	0.464443	0.416646	-0.156678
Tb427-100056500	0.464242	0.648058	0.481244
Tb427-000270300	0.464098	0.426944	-0.120383
Tb427-090090300	0.464072	0.688146	0.568367
Tb427-070077500	0.463278	0.528486	0.189988
Tb427-110062000	0.462394	0.409399	-0.175617
Tb427-100068100	0.462282	0.484392	0.067402
Tb427-060036000	0.461541	0.570733	0.306357
Tb427-080057800	0.461315	0.401657	-0.199788
Tb427-020020900	0.461135	0.545372	0.242049
Tb427-100064300	0.461092	0.266167	-0.792722
Tb427-090088600	0.460868	0.557179	0.273787
Tb427-090077100	0.46082	0.441067	-0.0632033
Tb427-030041500	0.460356	0.350079	-0.39507
Tb427-040052700	0.460267	0.362213	-0.345634
Tb427-080038600	0.459333	0.589211	0.359244
Tb427-060054800	0.459255	0.558092	0.281209
Tb427-080087400	0.459217	0.377442	-0.282921
Tb427-100151600	0.459167	0.30393	-0.59528
Tb427-080009800	0.459109	0.419264	-0.130978
Tb427-100015400	0.458089	0.361799	-0.340439
Tb427-050042700	0.457867	0.674419	0.558717
Tb427-070074100	0.457797	0.48245	0.075672
Tb427-110139900	0.457631	0.495096	0.113525
Tb427-080040600	0.457409	0.575143	0.330436
Tb427-110073400	0.457254	0.320374	-0.51324
Tb427-070005800	0.457249	0.270735	-0.756099
Tb427-110124800	0.457199	0.463693	0.020347
Tb427-110042500	0.45647	0.507601	0.153172
Tb427-070037800	0.456296	0.383565	-0.250498
Tb427-090009000	0.456223	0.632421	0.471145
Tb427-010023400	0.455695	0.425885	-0.0976056
Tb427-080009000	0.45561	0.641562	0.49379
Tb427-030057900	0.455602	0.338211	-0.429852
Tb427-020007900	0.45552	0.428304	-0.0888782
Tb427-060042700	0.455342	0.350249	-0.378569
Tb427-070026700	0.455266	0.557378	0.291948
Tb427-090029300	0.455265	0.422038	-0.109334
Tb427-050022000	0.455096	0.448786	-0.0201449
Tb427-100088900	0.454715	0.501292	0.140689
Tb427-110155500	0.454701	0.462992	0.0260679
Tb427-100058800	0.454616	0.472363	0.0552457
Tb427-030038600	0.454078	0.46128	0.0227023
Tb427-100154500	0.453969	0.423598	-0.0998982
Tb427-050023500	0.453939	0.42352	-0.100066
Tb427-080006300	0.453286	0.383888	-0.239734
Tb427-040046200	0.453239	0.40225	-0.172177
Tb427-100129100	0.452546	0.621157	0.456893
Tb427-110172200	0.452449	0.384193	-0.235925
Tb427-060017900	0.45239	0.344606	-0.392618
Tb427-090059800	0.45225	0.422679	-0.0975598
Tb427-040041000:pseudogene	0.452184	0.311961	-0.535546
Tb427-080081900	0.452138	0.465526	0.0420981
Tb427-110187600	0.45211	0.458797	0.0211835
Tb427-110010500	0.451788	0.389998	-0.21218
Tb427-030051800	0.451626	0.527366	0.223676
Tb427-040015700	0.451564	0.383112	-0.237165
Tb427-030011800	0.450018	0.506814	0.171474
Tb427-110173100	0.449962	0.499988	0.15209
Tb427-110060200	0.449873	0.440418	-0.0306416
Tb427-070078300	0.449799	0.484374	0.106841
Tb427-030041800	0.449796	0.423241	-0.0877907
Tb427-040048300	0.449617	0.794695	0.821705
Tb427-040007800	0.449342	0.35902	-0.323751
Tb427-080065800	0.449295	0.475582	0.082031
Tb427-110126400	0.449277	0.399991	-0.167635
Tb427-100117400	0.448789	0.45935	0.0335563
Tb427-080069100	0.448562	0.693091	0.627739
Tb427-090049700	0.448495	0.336388	-0.414968
Tb427-070014400	0.448424	0.361861	-0.309428
Tb427-090015800	0.448278	0.341223	-0.393678
Tb427-100116100	0.448083	0.436695	-0.0371408
Tb427-110157000	0.448029	0.4563	0.02639
Tb427-070006500	0.448006	0.625442	0.481358
Tb427-040015400	0.44783	0.382842	-0.226203
Tb427-070010400	0.447722	0.488296	0.125153
Tb427-110170100	0.447523	0.777552	0.796977
Tb427-100099700	0.447323	0.463458	0.0511221
Tb427-100042200	0.447015	0.374545	-0.255183
Tb427-070046100	0.446367	0.455914	0.0305296
Tb427-030015300	0.446097	0.567055	0.346133
Tb427-110091100	0.445798	0.631143	0.501576
Tb427-110089000	0.445753	0.357213	-0.319462
Tb427-100055900	0.445607	0.41928	-0.0878588
Tb427-100095000	0.445111	0.427034	-0.0598147
Tb427-110069200	0.445015	0.302355	-0.557613
Tb427-110016100	0.444653	0.308873	-0.525667
Tb427-090038100	0.44435	0.471729	0.086263
Tb427-100116000	0.444329	0.473426	0.0915105
Tb427-050045100	0.444186	0.334689	-0.408342
Tb427-030050500	0.444084	0.52773	0.248968
Tb427-110051700	0.443986	0.470048	0.082294
Tb427-070071600	0.44368	0.447206	0.0114204
Tb427-070037000	0.443502	0.351277	-0.336333
Tb427-010010700	0.443493	0.836867	0.916086
Tb427-080010000	0.442855	0.38597	-0.198345
Tb427-110130800	0.442618	0.523635	0.242502
Tb427-100011300	0.442527	0.368923	-0.262445
Tb427-100057800	0.442214	0.490904	0.150697
Tb427-100055000	0.442079	0.533625	0.271521
Tb427-080067100	0.441781	0.538971	0.286878
Tb427-090043700	0.441617	0.424506	-0.0570095
Tb427-110167600	0.441528	0.29901	-0.562309
Tb427-110078000	0.441132	0.430093	-0.0365613
Tb427-040011500	0.440812	0.410598	-0.102439
Tb427-110154400	0.44074	0.415247	-0.0859551
Tb427-060043000	0.440319	0.380796	-0.209533
Tb427-110161300	0.43987	0.304698	-0.529699
Tb427-050038000	0.439815	0.369343	-0.251936
Tb427-110041000	0.439689	0.496047	0.173992
Tb427-050042600	0.439597	0.472223	0.103287
Tb427-100055800	0.439527	0.448534	0.0292647
Tb427-110157800:pseudogene	0.439384	0.598473	0.445804
Tb427-040053400	0.438613	0.36913	-0.248819
Tb427-100136600	0.438186	0.606441	0.468825
Tb427-100134600	0.437805	0.402982	-0.119573
Tb427-060012100	0.437722	0.511913	0.225884
Tb427-040052800	0.437556	0.556068	0.345793
Tb427-110179200	0.437547	0.369812	-0.242645
Tb427-100024400	0.437345	0.543313	0.313014
Tb427-080076500	0.43723	0.389064	-0.168385
Tb427-110069500	0.436281	0.420852	-0.0519452
Tb427-010007800	0.435955	0.575637	0.40098
Tb427-010011800	0.435819	0.705811	0.695552
Tb427-060050300	0.435796	0.511325	0.230588
Tb427-090031500	0.435144	0.371035	-0.229936
Tb427-080054000	0.434999	0.287145	-0.599231
Tb427-090077000	0.434991	0.6008	0.465899
Tb427-030013100	0.434937	0.318949	-0.447479
Tb427-000838800:pseudogene	0.434642	0.52317	0.267452
Tb427-040047900	0.434505	0.44684	0.0403823
Tb427-110027300	0.434413	0.448206	0.0450948
Tb427-080020500	0.434163	0.731481	0.752582
Tb427-110032800	0.434037	0.43697	0.00971499
Tb427-050006700	0.433971	0.517388	0.253647
Tb427-060038000	0.433061	0.361406	-0.260948
Tb427-090030900	0.432968	0.380226	-0.187405
Tb427-100116900	0.432963	0.539722	0.317974
Tb427-070014700	0.432706	0.709899	0.714225
Tb427-010007000	0.432507	0.402055	-0.105331
Tb427-070075300	0.432288	0.54601	0.336936
Tb427-110111500	0.432235	0.348661	-0.309992
Tb427-100148200	0.431685	0.8581	0.991167
Tb427-060009400:pseudogene	0.431599	0.613837	0.508165
Tb427-080048900	0.431263	0.362278	-0.251471
Tb427-080088600	0.431008	0.523404	0.28021
Tb427-100123400	0.430606	0.340972	-0.336716
Tb427-040030800	0.430447	0.463905	0.107995
Tb427-080012100	0.430156	0.377203	-0.189516
Tb427-110052400	0.429869	0.447021	0.0564448
Tb427-090040300	0.429492	0.40575	-0.0820405
Tb427-100047500	0.429259	0.474531	0.144656
Tb427-050021300	0.428961	0.522995	0.285951
Tb427-100081600	0.428939	0.382104	-0.166807
Tb427-080025900	0.428906	0.464445	0.114845
Tb427-080029000	0.428789	0.310088	-0.467588
Tb427-100072300	0.428561	0.27818	-0.623485
Tb427-100145200	0.428312	0.337802	-0.342487
Tb427-070059600	0.428261	0.48155	0.169194
Tb427-100155600	0.428088	0.618636	0.531183
Tb427-110178800	0.42796	0.395247	-0.114722
Tb427-020032000	0.427431	0.442043	0.0484974
Tb427-100132400	0.427354	0.643911	0.591428
Tb427-030024100	0.42727	0.503473	0.236765
Tb427-050053000	0.42726	0.369848	-0.20818
Tb427-050013300	0.427068	0.438002	0.036472
Tb427-040050400	0.427056	0.564877	0.403513
Tb427-090012100	0.427007	0.389001	-0.134484
Tb427-060013000	0.426961	0.310317	-0.460361
Tb427-090032200	0.426535	0.36301	-0.232656
Tb427-100090200	0.426511	0.259828	-0.715024
Tb427-060046000	0.425965	0.400283	-0.0897135
Tb427-080062700	0.425632	0.331433	-0.360892
Tb427-080041300	0.425067	0.382433	-0.152482
Tb427-080056200	0.424677	0.369201	-0.20196
Tb427-060017200	0.424655	0.335074	-0.341811
Tb427-100016300:pseudogene	0.424298	0.272427	-0.639208
Tb427-040030100	0.424042	0.566439	0.417713
Tb427-030005700	0.423754	0.536974	0.341623
Tb427-010013200	0.423679	0.358217	-0.242137
Tb427-080048300	0.423657	0.356095	-0.250634
Tb427-070048300	0.423615	0.451094	0.0906765
Tb427-110150400	0.423602	0.51387	0.278694
Tb427-090088400	0.423552	0.562126	0.408354
Tb427-100029200	0.423435	0.429522	0.0205917
Tb427-070077400	0.42342	0.360788	-0.230935
Tb427-080046900	0.422995	0.521893	0.303114
Tb427-110032200	0.422976	0.533553	0.335057
Tb427-080017100	0.422947	0.336786	-0.328644
Tb427-030058800:pseudogene	0.422471	0.453379	0.101865
Tb427-100041100	0.422392	0.543992	0.365001
Tb427-060052700	0.422088	0.442755	0.068965
Tb427-110026300	0.421868	0.495475	0.23202
Tb427-040041400	0.421757	0.359573	-0.23013
Tb427-070058000	0.421753	0.327725	-0.363912
Tb427-110134800	0.421711	0.522866	0.310187
Tb427-040013300	0.421596	0.307619	-0.454717
Tb427-040032000	0.421285	0.438761	0.0586397
Tb427-110168100	0.421198	0.3906	-0.108808
Tb427-110142100	0.421178	0.377195	-0.159121
Tb427-110058100	0.421131	0.415717	-0.018669
Tb427-030049800	0.420583	0.464316	0.142716
Tb427-100011700	0.420261	0.351985	-0.255774
Tb427-100152400	0.42018	0.320556	-0.390431
Tb427-110043600	0.419536	0.405553	-0.0489065
Tb427-100165200	0.41922	0.341508	-0.295788
Tb427-110102400	0.419154	0.350594	-0.257678
Tb427-100008400	0.418943	0.381215	-0.136151
Tb427-100084000	0.418545	0.396521	-0.0779861
Tb427-100142500	0.418156	0.42375	0.0191727
Tb427-100143000	0.418032	0.451809	0.112098
Tb427-070028600	0.418025	0.394431	-0.0838171
Tb427-100011800	0.417899	0.429344	0.0389823
Tb427-040014500	0.417649	0.711515	0.768604
Tb427-050015900	0.41741	0.425233	0.0267884
Tb427-110062900	0.417322	0.330393	-0.336977
Tb427-100110500	0.417202	0.381632	-0.128565
Tb427-040048400	0.417147	0.570959	0.452831
Tb427-020023000	0.417113	0.503011	0.270153
Tb427-100046200:pseudogene	0.417068	0.238297	-0.80752
Tb427-100021300	0.417006	0.300655	-0.471958
Tb427-070017300	0.416974	0.307624	-0.438789
Tb427-090071600	0.416917	0.397465	-0.0689309
Tb427-100039600	0.416634	0.280269	-0.571966
Tb427-090052700	0.416518	0.492632	0.242131
Tb427-110183000	0.416415	0.323073	-0.366161
Tb427-110079800	0.416155	0.429957	0.0470725
Tb427-110187000	0.415838	0.523681	0.332669
Tb427-060048300	0.415202	0.38856	-0.0956763
Tb427-100100400	0.415164	0.541259	0.382639
Tb427-110169800	0.415074	0.327809	-0.340514
Tb427-110123500	0.415058	0.408827	-0.0218249
Tb427-110146100	0.41492	0.323248	-0.36019
Tb427-090007000	0.414917	0.413018	-0.00661674
Tb427-110103500	0.41471	0.410687	-0.0140647
Tb427-110088000	0.414707	0.362395	-0.194528
Tb427-100019800	0.414694	0.251344	-0.722382
Tb427-110029100	0.414356	0.277759	-0.577037
Tb427-090086000	0.414129	0.370366	-0.161131
Tb427-100032800	0.413963	0.452702	0.129061
Tb427-110069000	0.413587	0.477693	0.207893
Tb427-050035800	0.413517	0.354134	-0.223651
Tb427-070020400	0.413477	0.354842	-0.220634
Tb427-080058200	0.413354	0.325877	-0.343053
Tb427-110187800	0.412969	0.469051	0.183712
Tb427-090034200	0.41278	0.319545	-0.369353
Tb427-110082700	0.412566	0.45299	0.134856
Tb427-110175300	0.412494	0.316581	-0.381798
Tb427-060051700	0.412447	0.490801	0.250928
Tb427-080058400	0.412174	0.30781	-0.421211
Tb427-060037500	0.412147	0.382223	-0.108745
Tb427-100063800:pseudogene	0.412053	0.446495	0.115813
Tb427-070028500	0.411896	0.385831	-0.0943113
Tb427-100045000	0.411586	0.320531	-0.360731
Tb427-100148300	0.411247	0.326181	-0.334331
Tb427-060043200	0.411208	0.327487	-0.328432
Tb427-110096100	0.411186	0.39789	-0.0474213
Tb427-100054100	0.41042	0.449762	0.132063
Tb427-070017900:pseudogene	0.410241	0.29006	-0.500117
Tb427-100100300	0.409965	0.451561	0.139422
Tb427-090063400	0.409943	0.475711	0.214662
Tb427-090077700	0.409861	0.31375	-0.385518
Tb427-100127500	0.409693	0.261192	-0.649429
Tb427-110078100	0.409546	0.431072	0.0739021
Tb427-110166600	0.409483	0.324294	-0.3365
Tb427-070069300	0.409416	0.418339	0.031106
Tb427-050044500	0.409385	0.384978	-0.0886807
Tb427-070018700	0.40917	0.429342	0.0694285
Tb427-070027600	0.408707	0.356094	-0.198806
Tb427-080020300	0.408302	0.306031	-0.41596
Tb427-100035700	0.408266	0.221729	-0.880711
Tb427-100151500	0.408208	0.37674	-0.115737
Tb427-110020800	0.408176	0.348517	-0.227965
Tb427-080068400	0.408167	0.306102	-0.415146
Tb427-110164500:pseudogene	0.407915	0.491907	0.270116
Tb427-100132500	0.407811	0.411675	0.0136032
Tb427-080042900	0.407657	0.324145	-0.330716
Tb427-090029200	0.407648	0.332288	-0.294889
Tb427-100051600	0.407397	0.634064	0.638192
Tb427-100045900	0.407351	0.403294	-0.0144415
Tb427-100112000	0.4073	0.631266	0.632154
Tb427-070052600	0.407222	0.426877	0.0680041
Tb427-070056200	0.406846	0.400495	-0.0226961
Tb427-080025300	0.406235	0.382284	-0.0876699
Tb427-000173900	0.406104	0.430766	0.0850525
Tb427-110028300	0.405896	0.395915	-0.0359211
Tb427-100019400	0.405714	0.256818	-0.659714
Tb427-030026700	0.405346	0.33449	-0.277193
Tb427-090025300	0.405249	0.32811	-0.304629
Tb427-100005600	0.405182	0.454645	0.16617
Tb427-080013800	0.405097	0.22727	-0.833862
Tb427-040005700	0.405049	0.608154	0.586342
Tb427-070063500	0.404998	0.412099	0.025077
Tb427-110140800	0.40461	0.589504	0.542968
Tb427-040019200	0.404605	0.367821	-0.137509
Tb427-100036300	0.404239	0.522432	0.370035
Tb427-080061600	0.404115	0.335617	-0.267953
Tb427-080011800	0.404065	0.431142	0.0935744
Tb427-060009800	0.403955	0.549668	0.444365
Tb427-040027500	0.40389	0.355048	-0.185949
Tb427-010028500	0.403641	0.412054	0.0297614
Tb427-070029500	0.402859	0.362806	-0.151076
Tb427-070011700	0.402734	0.354277	-0.184948
Tb427-110027700	0.402684	0.355645	-0.179213
Tb427-090066800	0.40263	0.471353	0.227354
Tb427-110052300	0.402623	0.356266	-0.176473
Tb427-110037700	0.402307	0.335826	-0.260582
Tb427-110096300	0.402117	0.416905	0.0521035
Tb427-100123600	0.401964	0.362531	-0.148963
Tb427-100067500	0.401761	0.36352	-0.144302
Tb427-080035400	0.401716	0.390076	-0.042421
Tb427-080047100	0.401701	0.296796	-0.436652
Tb427-110173500	0.401641	0.329987	-0.283495
Tb427-110119600	0.401616	0.307419	-0.38561
Tb427-080068700	0.401524	0.284945	-0.494806
Tb427-100148500	0.401456	0.503841	0.327725
Tb427-110013800	0.401339	0.356554	-0.170699
Tb427-100026800	0.401147	0.273328	-0.553499
Tb427-070032000	0.401078	0.516826	0.365797
Tb427-040044200	0.401057	0.349889	-0.196908
Tb427-110040200	0.401017	0.323747	-0.308796
Tb427-070021900	0.400925	0.624618	0.639642
Tb427-070025700	0.400888	0.489373	0.287734
Tb427-110142200	0.400839	0.432443	0.109487
Tb427-100042800	0.400743	0.284436	-0.494577
Tb427-100068000	0.400663	0.401645	0.00352983
Tb427-110044700	0.400387	0.403758	0.0120943
Tb427-030058900	0.400299	0.322407	-0.312196
Tb427-030030900	0.400296	0.312174	-0.358715
Tb427-110186800	0.400086	0.296838	-0.430636
Tb427-080061800	0.399942	0.451961	0.176405
Tb427-110012000:pseudogene	0.399867	0.304852	-0.391411
Tb427-070059200	0.399816	0.322395	-0.310507
Tb427-070057800	0.399813	0.313573	-0.350526
Tb427-100063200	0.399464	0.428627	0.101656
Tb427-110091500	0.39939	0.344624	-0.212777
Tb427-060020100	0.399343	0.289649	-0.463323
Tb427-100168300	0.399237	0.340725	-0.228636
Tb427-080024100	0.399152	0.420952	0.0767168
Tb427-110109800	0.398807	0.455328	0.191217
Tb427-110141600	0.398795	0.414113	0.0543782
Tb427-070050000	0.398554	0.36655	-0.120764
Tb427-070008100	0.398501	0.312922	-0.348782
Tb427-000015100	0.39834	0.266434	-0.580226
Tb427-020030300	0.39816	0.411799	0.0485904
Tb427-030007500	0.397789	0.387751	-0.0368713
Tb427-100044900	0.397786	0.501866	0.335308
Tb427-100012800	0.397718	0.505147	0.34496
Tb427-090006900	0.397639	0.369578	-0.105579
Tb427-040019700	0.397367	0.349879	-0.183614
Tb427-070063400	0.397006	0.305685	-0.377117
Tb427-090034600	0.396811	0.279766	-0.504231
Tb427-090043300	0.39666	0.494107	0.316921
Tb427-090031000	0.396396	0.265547	-0.577974
Tb427-070067900	0.396304	0.588195	0.569685
Tb427-040020800	0.396248	0.380246	-0.0594717
Tb427-110176100	0.396022	0.309177	-0.357149
Tb427-110142700	0.396019	0.289625	-0.451384
Tb427-100104200	0.395671	0.440774	0.155737
Tb427-030044000	0.395569	0.341275	-0.212995
Tb427-020010400	0.39554	0.463997	0.230294
Tb427-100063700	0.395502	0.28547	-0.470345
Tb427-010023300	0.39541	0.385023	-0.0384063
Tb427-100033900	0.395233	0.401136	0.0213867
Tb427-100027100	0.395223	0.393806	-0.00518133
Tb427-070005900	0.395206	0.386395	-0.0325283
Tb427-110074800	0.394934	0.482161	0.287904
Tb427-110073200	0.394924	0.363497	-0.119629
Tb427-100109600	0.394364	0.370335	-0.0906954
Tb427-040010600	0.394302	0.355614	-0.148988
Tb427-080078800	0.394006	0.329868	-0.256328
Tb427-070068300	0.393881	0.603353	0.615242
Tb427-100033000	0.39384	0.282809	-0.477781
Tb427-020016900	0.393711	0.511334	0.377129
Tb427-110159200	0.393696	0.347973	-0.178108
Tb427-030008400	0.393571	0.461173	0.228685
Tb427-100048700	0.393351	0.393393	0.000154291
Tb427-100103000	0.393283	0.461833	0.231801
Tb427-110070100	0.393276	0.429582	0.127394
Tb427-110052900	0.393025	0.253803	-0.63091
Tb427-070014800	0.392973	0.341417	-0.202893
Tb427-060011000	0.392512	0.255054	-0.621935
Tb427-090040700	0.392417	0.322667	-0.282339
Tb427-000481500	0.392316	0.41977	0.0975831
Tb427-100014800	0.392229	0.564116	0.524295
Tb427-090008600	0.392	0.486108	0.310423
Tb427-030008300	0.391982	0.471736	0.267195
Tb427-030059300	0.391624	0.297382	-0.397151
Tb427-100152500	0.391546	0.322129	-0.281542
Tb427-100124400	0.391522	0.301971	-0.374684
Tb427-010008200	0.391417	0.319604	-0.292422
Tb427-090038700	0.391159	0.488681	0.321137
Tb427-100113000	0.390973	0.525318	0.426124
Tb427-050038700	0.390727	0.372178	-0.0701671
Tb427-080006400	0.39063	0.293023	-0.414786
Tb427-110083200	0.390508	0.310254	-0.331904
Tb427-010017000	0.390503	0.404173	0.0496405
Tb427-030019100	0.39044	0.416	0.0914844
Tb427-070081800	0.390363	0.296326	-0.39763
Tb427-100153500	0.390347	0.402451	0.0440576
Tb427-030014200	0.39028	0.425102	0.123302
Tb427-040023800	0.390191	0.412624	0.0806448
Tb427-110081500	0.389919	0.366252	-0.0903388
Tb427-100087100	0.389522	0.448889	0.204651
Tb427-040023500	0.389495	0.544932	0.48447
Tb427-100112200	0.38943	0.610831	0.649409
Tb427-070035300	0.389319	0.3771	-0.0460073
Tb427-080078900	0.389308	0.327706	-0.248509
Tb427-110098700	0.389188	0.453721	0.221338
Tb427-090047700	0.389022	0.238435	-0.706258
Tb427-110094500	0.388944	0.386613	-0.00867225
Tb427-080079700	0.388774	0.459069	0.239778
Tb427-110151200	0.388768	0.339494	-0.195526
Tb427-060050600	0.388521	0.356584	-0.123751
Tb427-050022600	0.388305	0.399358	0.0404933
Tb427-110067000	0.388173	0.753725	0.957339
Tb427-080080800	0.388072	0.453066	0.223397
Tb427-030056000	0.38801	0.372166	-0.0601483
Tb427-080050000	0.387779	0.364326	-0.0900028
Tb427-090019400	0.387671	0.386489	-0.00440616
Tb427-050025400	0.387509	0.263701	-0.555331
Tb427-100127000	0.387468	0.280455	-0.466308
Tb427-030032200:pseudogene	0.387457	0.648886	0.743927
Tb427-020005500	0.387413	0.419892	0.116144
Tb427-080064700	0.387379	0.263646	-0.555143
Tb427-110089800	0.387356	0.410184	0.0826094
Tb427-030047900	0.386823	0.363749	-0.0887327
Tb427-090042300	0.386818	0.687584	0.82988
Tb427-070082200	0.386778	0.322071	-0.26413
Tb427-010014700	0.386693	0.321425	-0.266706
Tb427-030017300:pseudogene	0.386581	0.370048	-0.0630579
Tb427-110023700	0.386272	0.31161	-0.309874
Tb427-040052500	0.38603	0.381839	-0.0157485
Tb427-050015700	0.385931	0.398885	0.0476317
Tb427-080041200	0.385822	0.203772	-0.920978
Tb427-100023000	0.38515	0.301581	-0.352874
Tb427-090048000	0.38508	0.405656	0.0751001
Tb427-080049500	0.384835	0.305424	-0.333428
Tb427-010029200	0.38478	0.46019	0.258195
Tb427-000832000	0.384484	0.333049	-0.207188
Tb427-070035800	0.384359	0.471473	0.294722
Tb427-050053500	0.38425	0.435555	0.180808
Tb427-060019500	0.383983	0.333565	-0.203076
Tb427-090066300	0.383958	0.385303	0.00504344
Tb427-080025700	0.383937	0.260758	-0.558155
Tb427-070046000	0.383911	0.352079	-0.124873
Tb427-060026800	0.383867	0.38064	-0.0121804
Tb427-100040900	0.383596	0.428989	0.161354
Tb427-100043600	0.383425	0.478341	0.319094
Tb427-080077500	0.383201	0.429522	0.164629
Tb427-040010000	0.382872	0.333019	-0.201257
Tb427-030012600	0.382812	0.299662	-0.3533
Tb427-090083900	0.382768	0.358503	-0.0944859
Tb427-020025500	0.382367	0.433551	0.181243
Tb427-070079200	0.38234	0.375857	-0.0246695
Tb427-110078400	0.382272	0.336329	-0.184727
Tb427-060032200:pseudogene	0.382259	0.301609	-0.341871
Tb427-110142600	0.38224	0.318788	-0.261883
Tb427-030044500	0.382168	0.577862	0.596517
Tb427-020011700	0.382098	0.510023	0.416619
Tb427-040042200	0.38205	0.362379	-0.0762617
Tb427-070049300	0.382002	0.348238	-0.133506
Tb427-010013600	0.381901	0.346183	-0.141663
Tb427-110088100	0.38184	0.368761	-0.050284
Tb427-100070600	0.38182	0.324857	-0.233089
Tb427-100092700	0.381563	0.343073	-0.153405
Tb427-040034100	0.381548	0.342334	-0.15646
Tb427-070046200	0.381444	0.415419	0.123096
Tb427-080030100	0.381437	0.308005	-0.308491
Tb427-100079000	0.381344	0.423285	0.150534
Tb427-110155000	0.381333	0.449279	0.236562
Tb427-040054300	0.380476	0.244834	-0.635997
Tb427-100042700	0.380453	0.227631	-0.741022
Tb427-050052800	0.380354	0.47091	0.308109
Tb427-110071000	0.380312	0.606607	0.67358
Tb427-030032800	0.380077	0.393652	0.0506323
Tb427-000144900	0.380069	0.424661	0.160052
Tb427-110044200	0.379998	0.28695	-0.405192
Tb427-060029400	0.37991	0.399953	0.0741699
Tb427-070027900	0.379862	0.362127	-0.0689798
Tb427-010032200	0.379779	0.537175	0.500232
Tb427-110057900	0.379465	0.392674	0.0493655
Tb427-100082200	0.379401	0.379277	-0.00047067
Tb427-010030000	0.379375	0.317296	-0.257797
Tb427-080084600	0.37934	0.478507	0.33505
Tb427-030009400	0.379151	0.388094	0.0336348
Tb427-080057700	0.378759	0.25811	-0.55329
Tb427-110070700	0.378441	0.431214	0.188338
Tb427-110043400	0.378298	0.320741	-0.238111
Tb427-080045400	0.378036	0.446287	0.23945
Tb427-080064200	0.377992	0.283054	-0.417277
Tb427-060043900	0.377951	0.283536	-0.414667
Tb427-030019200	0.37785	0.323253	-0.22515
Tb427-100058500	0.377823	0.346459	-0.125025
Tb427-070023900	0.377542	0.340466	-0.149126
Tb427-110182900	0.377446	0.268391	-0.491935
Tb427-020018200	0.37727	0.339917	-0.150414
Tb427-070078600	0.377264	0.396075	0.0701991
Tb427-080041700	0.377091	0.366527	-0.040993
Tb427-000285400:pseudogene	0.376997	0.280016	-0.429045
Tb427-110144400	0.37698	0.32097	-0.23205
Tb427-080039300	0.376896	0.339419	-0.151101
Tb427-040005900	0.376833	0.641762	0.768113
Tb427-090076100	0.376395	0.376898	0.00192872
Tb427-030049500	0.376322	0.287112	-0.390356
Tb427-050034200	0.376215	0.438289	0.220323
Tb427-080049400	0.376047	0.231393	-0.700564
Tb427-040017400	0.376011	0.338162	-0.15306
Tb427-060056100	0.3756	0.263195	-0.513062
Tb427-110169900	0.375573	0.310559	-0.274228
Tb427-080008000	0.375552	0.344916	-0.122768
Tb427-060008000	0.375453	0.390564	0.0569274
Tb427-100151200:pseudogene	0.375059	0.468978	0.322404
Tb427-040052000	0.374987	0.315514	-0.249133
Tb427-100067700	0.374829	0.431247	0.202281
Tb427-040029600	0.374685	0.302851	-0.307069
Tb427-110110600	0.374648	0.439151	0.229182
Tb427-080033500	0.374554	0.320239	-0.226023
Tb427-070044200	0.374506	0.328476	-0.1892
Tb427-080078300	0.374425	0.293206	-0.35276
Tb427-090083800	0.374355	0.485212	0.374209
Tb427-050043600	0.374262	0.413991	0.145549
Tb427-030016600	0.374174	0.425504	0.185464
Tb427-080073200	0.374087	0.303192	-0.30314
Tb427-080021400	0.373898	0.306703	-0.285801
Tb427-090087900	0.373698	0.373539	-0.000614974
Tb427-110171100	0.373667	0.39101	0.0654557
Tb427-020031400	0.37346	0.385486	0.0457234
Tb427-060012700:pseudogene	0.373447	0.315891	-0.241478
Tb427-090015100	0.373444	0.283248	-0.398829
Tb427-070049500	0.373351	0.467883	0.325617
Tb427-090017400	0.373197	0.447558	0.262135
Tb427-080030800	0.373051	0.390915	0.0674839
Tb427-040021500	0.373023	0.351115	-0.0873248
Tb427-020029700	0.372967	0.430661	0.207504
Tb427-080008400	0.372301	0.391756	0.0734851
Tb427-110039900	0.372203	0.270576	-0.460059
Tb427-110170400	0.37205	0.401289	0.109146
Tb427-020010000	0.371731	0.332589	-0.160521
Tb427-070037100	0.371668	0.260635	-0.511982
Tb427-030011600	0.371621	0.409271	0.139224
Tb427-100152900	0.371386	0.266011	-0.481435
Tb427-070071700	0.371293	0.484307	0.383365
Tb427-080044700	0.371023	0.355611	-0.0612103
Tb427-050008100	0.371007	0.565197	0.607309
Tb427-060040500	0.370931	0.277229	-0.420071
Tb427-100093100	0.370723	0.394855	0.090983
Tb427-050035400	0.370626	0.350346	-0.0811822
Tb427-060020200	0.370532	0.272653	-0.442535
Tb427-080036700	0.370404	0.389131	0.071156
Tb427-080047700	0.370342	0.319908	-0.211202
Tb427-100095600	0.370177	0.326888	-0.179417
Tb427-040006100	0.370154	0.267585	-0.468127
Tb427-040031200	0.370031	0.335129	-0.142929
Tb427-020021200	0.37003	0.475658	0.362281
Tb427-050021100	0.369621	0.329262	-0.16681
Tb427-060037300	0.369462	0.385119	0.0598777
Tb427-090016400	0.369096	0.436814	0.243024
Tb427-110055300	0.369046	0.249964	-0.562082
Tb427-080041800	0.369035	0.351633	-0.0696895
Tb427-090024900	0.368965	0.379505	0.0406355
Tb427-040021800	0.368962	0.444125	0.267491
Tb427-070014300	0.368867	0.457485	0.310626
Tb427-100018200	0.36876	0.367082	-0.00658127
Tb427-080036200:pseudogene	0.368721	0.315742	-0.223781
Tb427-040056000	0.368712	0.501593	0.444022
Tb427-020031900	0.368501	0.35616	-0.0491427
Tb427-010029000	0.36846	0.396614	0.106225
Tb427-100139900	0.368374	0.246268	-0.580942
Tb427-090030700	0.36811	0.400779	0.122673
Tb427-040026200	0.367538	0.252557	-0.541285
Tb427-110024000	0.367275	0.377204	0.0384873
Tb427-070068600	0.367073	0.444784	0.277038
Tb427-070078400	0.366934	0.328253	-0.160713
Tb427-030032300	0.366506	0.330486	-0.149247
Tb427-100063000	0.366502	0.25068	-0.547976
Tb427-100143200	0.366376	0.406547	0.150096
Tb427-100130700	0.3663	0.286108	-0.356466
Tb427-090089100	0.366209	0.444473	0.279427
Tb427-060042500	0.366023	0.419034	0.195131
Tb427-110128400	0.365822	0.290146	-0.334367
Tb427-100118500	0.365601	0.433162	0.244637
Tb427-090046200	0.365437	0.318878	-0.196617
Tb427-070011600	0.365302	0.434209	0.2493
Tb427-070072100	0.365162	0.338703	-0.108514
Tb427-040025500	0.365067	0.356466	-0.0343969
Tb427-100147800	0.364998	0.309835	-0.236388
Tb427-110142500	0.364946	0.390498	0.0976315
Tb427-110109500	0.364762	0.485617	0.412864
Tb427-100146100	0.364355	0.440973	0.275346
Tb427-100089700	0.364072	0.48194	0.404631
Tb427-030057000	0.364056	0.40329	0.147657
Tb427-040017300	0.364021	0.236282	-0.62351
Tb427-040049000	0.363978	0.300461	-0.276675
Tb427-100005400	0.363819	0.429673	0.240021
Tb427-010028100	0.363814	0.365002	0.00470307
Tb427-060048900	0.363777	0.390156	0.100995
Tb427-110111200	0.363776	0.234808	-0.631567
Tb427-070027200	0.363713	0.321912	-0.176135
Tb427-100053000	0.363674	0.423917	0.221135
Tb427-100135900	0.363602	0.40676	0.161818
Tb427-100052100:pseudogene	0.363494	0.332912	-0.126789
Tb427-110165700	0.363459	0.392425	0.110622
Tb427-100156500	0.363428	0.353691	-0.0391817
Tb427-110047300	0.362611	0.458615	0.338862
Tb427-080056700	0.362576	0.381042	0.0716674
Tb427-090061700	0.362314	0.510804	0.49553
Tb427-100062400	0.361857	0.321464	-0.170762
Tb427-030021100	0.361787	0.452807	0.323755
Tb427-070059400:pseudogene	0.361782	0.301499	-0.262967
Tb427-100156600	0.361536	0.460109	0.347837
Tb427-100124800	0.361289	0.363759	0.00982831
Tb427-110037300	0.360889	0.542287	0.5875
Tb427-110043100	0.360862	0.339141	-0.0895636
Tb427-070028900	0.360655	0.403681	0.162598
Tb427-090080500	0.360617	0.253176	-0.510327
Tb427-090038800	0.360429	0.406678	0.174169
Tb427-050052000	0.360377	0.364948	0.0181842
Tb427-080058300	0.359876	0.357121	-0.0110868
Tb427-100096000	0.35983	0.386385	0.102725
Tb427-100095800	0.359512	0.393623	0.130773
Tb427-110187900	0.359508	0.308705	-0.219796
Tb427-030014800	0.35943	0.415622	0.209559
Tb427-070018000	0.359395	0.359738	0.00137414
Tb427-050031700	0.359391	0.28728	-0.323097
Tb427-100039700	0.359345	0.262624	-0.452371
Tb427-080008500	0.359307	0.405067	0.172946
Tb427-050031100	0.359027	0.364322	0.0211229
Tb427-110066600	0.358919	0.355856	-0.0123642
[truncated: 7,605 more rows]

## Sheet: PCF pseudobulk
Comparison of fresh and frozen PCF samples of pseudobulked transcripts. The average transcript count across cells is shown per gene (feature), for each sample along with the log2(FC). Genes with log2 (FC) over or above 1 were consvered up or down regulated. Genes with average expression < 0.05 were not considered.
Feature	PCF-fresh	PCF-frozen	PCF_FC	PCF_diffexpressed
Tb427-100060400	12.1825	5.99012	-1.02415	downregulated
Tb427-080040400	1.39107	0.53457	-1.37974	downregulated
Tb427-080032800	0.895196	0.403691	-1.14895	downregulated
Tb427-110130000	0.874357	0.410803	-1.08978	downregulated
Tb427-100063300	0.590451	0.291928	-1.0162	downregulated
Tb427-070027700	0.561898	0.257864	-1.1237	downregulated
Tb427-040008300	0.55102	0.24364	-1.17736	downregulated
Tb427-100040700	0.526621	0.252121	-1.06265	downregulated
Tb427-110175600	0.471328	0.232545	-1.01922	downregulated
Tb427-060031600	0.465343	0.23038	-1.01428	downregulated
Tb427-000664100:pseudogene	0.456647	0.189907	-1.26579	downregulated
Tb427-100125800	0.456047	0.175072	-1.38123	downregulated
Tb427-070076100	0.439448	0.213281	-1.04294	downregulated
Tb427-100096600	0.42525	0.202049	-1.07361	downregulated
Tb427-100106400	0.407488	0.19624	-1.05414	downregulated
Tb427-100060200	0.398435	0.139498	-1.5141	downregulated
Tb427-010020900	0.392416	0.166394	-1.23778	downregulated
Tb427-030017200	0.381605	0.175013	-1.12462	downregulated
Tb427-060044700	0.379033	0.173198	-1.1299	downregulated
Tb427-110073100	0.279416	0.139511	-1.00204	downregulated
Tb427-080040200	0.269265	0.124484	-1.11306	downregulated
Tb427-110006100	0.260889	0.105881	-1.301	downregulated
Tb427-110167000	0.258102	0.126154	-1.03275	downregulated
Tb427-090072200	0.233106	0.113816	-1.03429	downregulated
Tb427-100127300	0.231098	0.100596	-1.19994	downregulated
Tb427-080070800	0.228981	0.114333	-1.00198	downregulated
Tb427-100091900	0.166458	0.0651859	-1.35252	downregulated
Tb427-060008500	0.663188	1.68885	1.34855	upregulated
Tb427-100109400:pseudogene	0.17439	0.408911	1.22947	upregulated
Tb427-060007000:pseudogene	0.155937	0.339741	1.12347	upregulated
Tb427-110010700	0.147944	0.306813	1.05231	upregulated
Tb427-060007300:pseudogene	0.14599	0.293549	1.00773	upregulated
Tb427-100108800	0.137261	2.80181	4.35137	upregulated
Tb427-100109100	0.130457	0.957247	2.87532	upregulated
Tb427-070037900:pseudogene	0.122482	0.266973	1.12412	upregulated
Tb427-100108900	0.120222	1.5879	3.72334	upregulated
Tb427-050007000:pseudogene	0.117275	0.258852	1.14223	upregulated
Tb427-000819000:pseudogene	0.112443	0.22757	1.01712	upregulated
Tb427-020029100	0.109723	0.226412	1.04508	upregulated
Tb427-100109000	0.108458	0.935994	3.10937	upregulated
Tb427-000785000:pseudogene	0.103137	0.25177	1.28755	upregulated
Tb427-070005400	0.0976695	0.229189	1.23055	upregulated
Tb427-060008600:pseudogene	0.0974898	0.47118	2.27296	upregulated
Tb427-000636500:pseudogene	0.0903075	0.267493	1.56658	upregulated
Tb427-110105900	0.089934	0.186126	1.04934	upregulated
Tb427-080040000	0.0862239	0.17723	1.03946	upregulated
Tb427-000348300:pseudogene	0.0795104	0.200402	1.33368	upregulated
Tb427-050007600:pseudogene	0.079375	0.2278	1.52101	upregulated
Tb427-070074900	0.0701281	0.336165	2.26111	upregulated
Tb427-100101800	0.0691963	0.144022	1.05752	upregulated
Tb427-090041000	0.0672649	0.162624	1.27361	upregulated
Tb427-000703500:pseudogene	0.0670687	0.254305	1.92285	upregulated
Tb427-100145000	0.0643938	0.152561	1.24439	upregulated
Tb427-060008700:pseudogene	0.0633041	0.605143	3.2569	upregulated
Tb427-000766300:pseudogene	0.0601876	0.18827	1.64526	upregulated
Tb427-070075900	7983.01	7735.24	-0.0454873
Tb427-010025700	763.637	629.591	-0.278471
Tb427-060008300	207.155	169.411	-0.290186
Tb427-070076200	80.9724	79.7718	-0.0215507
Tb427-000016000	69.567	49.1433	-0.501408
Tb427-000729100	64.997	52.1422	-0.317923
Tb427-100096400	60.8555	51.7183	-0.234711
Tb427-090061600	46.7812	40.3578	-0.213082
12S-rRNA	41.8223	33.3624	-0.326051
Tb427-090027000	38.8052	26.1015	-0.572119
Tb427-100044400	36.7935	32.4962	-0.179179
Tb427-110013500	35.6459	34.6002	-0.0429574
Tb427-110009200	35.376	33.1637	-0.0931661
Tb427-040015300	31.8009	24.6672	-0.366472
Tb427-100064900	29.6557	28.333	-0.0658293
Tb427-060046300	29.1742	25.8113	-0.176687
Tb427-090066200	28.3346	22.8662	-0.30935
COII	27.5716	24.1305	-0.192325
Tb427-090027100	25.0489	19.1405	-0.38812
Tb427-080056500	25.0329	18.2418	-0.456572
Tb427-010017400	24.0281	20.4637	-0.231655
Tb427-100109300	22.2371	20.9002	-0.0894475
Tb427-010016800	21.4435	19.8385	-0.112237
COIII	20.9063	16.1881	-0.369005
Tb427-060018100	18.6055	15.2676	-0.285257
Tb427-000667900	18.2343	22.0246	0.272462
Tb427-100098000	18.1933	13.7581	-0.403132
Tb427-000775700	18.1212	15.0549	-0.267448
Tb427-110051900	18.0895	12.7416	-0.505612
COI	17.6799	17.4821	-0.0162336
Tb427-090032300	15.7159	9.66088	-0.701996
Tb427-100162700	15.4809	13.0242	-0.24929
Tb427-030006900	14.3292	14.3657	0.00367559
Tb427-040046900	14.2951	9.86272	-0.53546
Tb427-050012900	14.1649	13.4683	-0.0727517
Tb427-040027800	14.1446	11.2416	-0.331409
Tb427-040042400	14.0333	11.4589	-0.29239
Tb427-070040800	13.8059	11.341	-0.283734
Tb427-090049100	13.343	11.0618	-0.270503
Tb427-100037100	13.2506	10.284	-0.365648
Tb427-060039800	13.1491	14.0547	0.0960879
Tb427-040053500	13.1184	10.4701	-0.32531
Tb427-090014800	13.0277	12.7562	-0.0303765
Tb427-070075400:pseudogene	12.9185	14.365	0.153115
Tb427-090042400	12.911	12.0662	-0.0976285
Tb427-020019500	11.8612	8.79938	-0.430779
Tb427-040029800	11.7345	10.2782	-0.191163
ND7	11.7291	10.7958	-0.119618
Tb427-090058000	11.6625	7.9452	-0.553717
Tb427-030010900	11.4453	10.8538	-0.0765645
Tb427-060033000	11.3925	10.2285	-0.155483
Tb427-100167200	11.3553	8.66734	-0.389702
Tb427-090031800	11.0727	11.7654	0.0875428
Tb427-030030200	10.8473	6.775	-0.679037
Tb427-100106800	10.7325	6.09196	-0.817007
Tb427-050012800	10.6908	10.6458	-0.00609032
Tb427-110133300	10.6897	8.75966	-0.287277
Tb427-100135600	10.613	10.2356	-0.0522372
Tb427-030022000	10.5808	7.79566	-0.440705
Tb427-030033300	10.4722	5.54713	-0.916748
Tb427-080021500	10.3481	9.90919	-0.0625301
Tb427-040020900	10.1426	9.56819	-0.0841091
Tb427-110189900	10.1097	7.90001	-0.355813
Tb427-010026000	9.62101	8.67225	-0.149782
Tb427-100049800	9.42455	7.04403	-0.420022
Tb427-030055300	9.34922	6.84953	-0.44884
9S-rRNA	9.26756	8.78413	-0.0772908
Tb427-050009000	9.24558	10.7556	0.218251
Tb427-020022600	9.07641	8.62679	-0.0732976
Tb427-110067700	9.01418	7.76026	-0.21609
Tb427-070050700	8.91504	7.4094	-0.266885
Tb427-080073800	8.82581	7.13788	-0.306234
Tb427-010016700	8.74084	8.11824	-0.106605
Tb427-110024600	8.18744	6.95887	-0.23456
Tb427-030018100	8.16446	5.73196	-0.510329
Tb427-110009300	8.14748	9.74656	0.258541
Tb427-070065500	8.13	6.95246	-0.225733
Tb427-070076300	8.09482	8.44278	0.0607195
Tb427-110123100	8.02046	7.46384	-0.103767
Tb427-040033100	7.85754	7.42742	-0.0812167
Tb427-050015800	7.77115	6.85038	-0.181945
Tb427-100015000	7.74318	6.98454	-0.148761
Tb427-100135700	7.66402	6.03242	-0.345365
Tb427-050014700	7.62948	6.12723	-0.31635
Tb427-040022700	7.55768	5.88036	-0.36204
Tb427-100017900	7.55696	6.50963	-0.215231
Tb427-100062200	7.53538	7.56183	0.00505425
Tb427-080007500	7.32177	4.38745	-0.73881
Tb427-110167900	7.27266	4.97161	-0.54877
Tb427-000666100	7.22227	7.15395	-0.0137122
Tb427-030013500	7.18871	5.98313	-0.264833
Tb427-000668200	6.93387	5.30331	-0.386767
Tb427-100080100	6.93163	7.29419	0.073552
Tb427-080036000	6.92326	7.11093	0.0385855
Tb427-060043400	6.91596	5.52703	-0.323426
Tb427-090066100	6.83328	5.2077	-0.391932
Tb427-110160400	6.66649	5.00672	-0.413061
Tb427-060055700	6.58878	5.12306	-0.363006
Tb427-090031700	6.52823	6.46176	-0.0147649
Tb427-110187400	6.40353	5.80493	-0.141589
Tb427-110009700	6.38235	5.09938	-0.323764
Tb427-100064800	6.31311	5.15321	-0.292878
Cyb	6.30886	6.09648	-0.0494037
Tb427-100008600	6.30792	4.58175	-0.461264
ND4	6.23958	6.36137	0.0278884
Tb427-050008600	6.19843	4.69837	-0.399744
Tb427-090073100	6.19129	4.11336	-0.589923
Tb427-110131800	6.12577	4.34721	-0.494802
Tb427-060042300	6.08251	6.10792	0.00601504
Tb427-100125100	6.0794	5.28491	-0.202051
Tb427-110060300	6.07375	5.7157	-0.0876588
Tb427-030040300	6.04703	7.03064	0.217429
Tb427-110081800	6.03864	4.61444	-0.388068
Tb427-110150500	6.03278	5.27381	-0.193977
Tb427-110159100	6.00304	5.34042	-0.168742
Tb427-110064600	5.98777	4.97745	-0.266613
Tb427-110067200	5.87749	5.29618	-0.150248
Tb427-070045100	5.82573	6.71535	0.205024
Tb427-100109200	5.80214	9.12693	0.653545
Tb427-100092100	5.78735	5.04472	-0.198128
Tb427-080079900	5.76282	5.06998	-0.184795
Tb427-110073700	5.75302	4.87895	-0.237748
Tb427-090034500	5.74887	5.53043	-0.0558858
Tb427-110031800	5.51806	5.33966	-0.0474146
Tb427-100049600	5.35559	4.73501	-0.177678
Tb427-110057900	5.33869	3.5557	-0.586353
Tb427-010029100	5.26435	4.14278	-0.345657
Tb427-080009100	5.23938	5.2416	0.000612445
Tb427-100132400	5.22132	4.70261	-0.15095
Tb427-070050100	5.21066	4.09062	-0.349146
Tb427-060008400	5.19925	7.52995	0.534336
Tb427-080040100	5.19527	4.02617	-0.367791
Tb427-090045300	5.19221	5.26008	0.0187356
Tb427-080020700	5.16549	4.91995	-0.070264
Tb427-100018700	5.12233	4.03545	-0.344071
Tb427-090072800	5.12087	4.28731	-0.256316
Tb427-100081800	5.10878	4.0877	-0.321691
Tb427-040036000	4.98095	3.40938	-0.546915
Tb427-060025400	4.97993	2.84716	-0.806601
Tb427-110031000	4.97352	5.96619	0.262542
Tb427-110158700	4.94799	3.77195	-0.391531
Tb427-010015900	4.9368	4.67828	-0.0775964
Tb427-090028400	4.91175	5.06866	0.0453653
Tb427-090064500	4.86991	4.55144	-0.0975742
Tb427-100140700	4.84643	4.25585	-0.187476
Tb427-050015600	4.82703	3.89793	-0.308429
Tb427-100134400	4.79243	3.83204	-0.322645
Tb427-050021900	4.78261	5.2337	0.130034
Tb427-030007100	4.76983	6.14258	0.364908
Tb427-110012100	4.76618	4.57577	-0.0588194
Tb427-110015700	4.73996	2.64107	-0.843752
Tb427-100154100	4.73537	4.49802	-0.0741858
Tb427-080040300	4.72577	3.45792	-0.450645
Tb427-100064600	4.72419	4.30179	-0.135132
Tb427-110021800	4.68972	2.7785	-0.755196
Tb427-080072100	4.62063	3.74649	-0.302552
Tb427-080007400	4.61948	4.09133	-0.17516
Tb427-070047200	4.61595	3.21454	-0.522017
Tb427-110105700	4.60489	6.56369	0.51134
Tb427-070066900	4.53846	3.70442	-0.292956
Tb427-110089700	4.51787	4.15486	-0.120846
Tb427-060043000	4.51627	3.93441	-0.198986
Tb427-110038200	4.49569	4.07415	-0.142043
Tb427-090074600	4.47156	3.0299	-0.561507
Tb427-110042100	4.46876	4.49892	0.00970532
Tb427-100156200	4.46304	4.41018	-0.0171866
Tb427-010022900	4.45462	4.41177	-0.0139446
Tb427-110023800	4.44783	4.23401	-0.0710757
Tb427-100037700	4.4356	3.80922	-0.219634
Tb427-070046100	4.34951	4.37681	0.00902573
Tb427-090032000	4.34135	4.47627	0.0441529
Tb427-100134500	4.33458	3.70343	-0.227028
Tb427-100062500	4.31646	4.32878	0.00411195
Tb427-100148200	4.29516	3.81531	-0.170909
Tb427-030010100	4.29422	3.3543	-0.356384
Tb427-080070100	4.28851	3.74895	-0.193993
Tb427-080011300	4.28468	4.18699	-0.0332723
Tb427-110118600	4.26394	2.39299	-0.833372
Tb427-060013500	4.22534	3.66876	-0.203775
Tb427-090089800	4.18874	4.45557	0.089091
Tb427-110025500	4.18038	4.91956	0.234895
Tb427-060049500	4.14265	4.14795	0.00184365
Tb427-100120900	4.13855	3.82421	-0.113965
Tb427-080028700	4.12107	2.78411	-0.565803
Tb427-090089500	4.10125	4.56267	0.153814
Tb427-030017600	4.05714	3.43471	-0.240277
Tb427-100069700	4.04839	5.39203	0.413479
Tb427-070047100	4.02026	2.78156	-0.531393
Tb427-110014900	4.01099	3.44638	-0.218877
Tb427-080066800	4.00401	2.84459	-0.493224
Tb427-060017600	3.95557	3.18185	-0.314021
Tb427-070030900	3.94273	3.97884	0.0131506
Tb427-060042400	3.9335	3.76304	-0.0639169
Tb427-090084100	3.92524	3.62483	-0.114868
Tb427-110187100	3.90444	3.46549	-0.172055
Tb427-100116700	3.89762	3.48044	-0.163327
Tb427-100161200	3.89302	3.71813	-0.066313
Tb427-070026200	3.85176	3.48528	-0.144244
Tb427-090053700	3.84694	3.48528	-0.142438
Tb427-000073700:pseudogene	3.84178	4.16168	0.115393
Tb427-110041200	3.8408	4.686	0.286951
Tb427-030009900	3.8383	4.07949	0.0879186
Tb427-110157800:pseudogene	3.83753	4.28413	0.158826
ND1	3.82486	3.09813	-0.304009
Tb427-110070900	3.82207	3.99266	0.0629923
Tb427-100130000	3.8194	2.93437	-0.380295
Tb427-110037600	3.80198	2.46864	-0.623035
Tb427-110012300	3.75158	3.09142	-0.27923
Tb427-070078000	3.7282	2.05722	-0.857781
Tb427-070078500	3.70185	4.46041	0.268927
Tb427-070031500	3.69821	2.98673	-0.308258
Tb427-050032100	3.69327	2.69951	-0.452201
Tb427-090090000	3.66621	3.24775	-0.17485
Tb427-100027800:pseudogene	3.64516	3.04432	-0.25986
Tb427-010028200	3.64473	3.16936	-0.201622
Tb427-090052600	3.64347	2.87582	-0.341341
Tb427-040050800	3.6234	3.0472	-0.249861
Tb427-100125200	3.6108	2.91036	-0.311119
Tb427-080046800	3.56636	3.23014	-0.142856
Tb427-090071400	3.56595	2.95904	-0.26916
Tb427-010010600	3.53358	3.67097	0.0550289
Tb427-110120900	3.53064	2.82316	-0.32262
Tb427-090058400	3.52823	2.79416	-0.336532
Tb427-030009000	3.51447	2.36411	-0.572011
Tb427-080066000	3.50887	3.99463	0.187059
Tb427-080013400	3.49365	4.32551	0.308135
Tb427-110029000	3.48954	3.30697	-0.0775307
Tb427-110037500	3.47327	3.0256	-0.199077
Tb427-110069400	3.46083	2.93094	-0.239757
Tb427-090052000	3.44327	2.45565	-0.487673
Tb427-110178400	3.44036	2.72054	-0.338662
Tb427-090034800	3.41506	3.43002	0.00630616
Tb427-080050400	3.40214	3.1458	-0.113015
Tb427-020008100	3.39487	3.07372	-0.143374
Tb427-100123000	3.37654	3.4221	0.0193376
Tb427-010027700	3.31739	2.6944	-0.300083
Tb427-030026600	3.31312	2.00151	-0.727104
Tb427-030040600	3.31279	2.52672	-0.39078
Tb427-110165900	3.29475	2.65266	-0.312729
Tb427-110079200	3.28986	2.37385	-0.470796
Tb427-080067500	3.28095	3.33722	0.0245306
Tb427-070010500	3.27729	3.18991	-0.0389897
Tb427-110131100	3.2699	3.19762	-0.0322473
Tb427-090083000	3.24852	2.6364	-0.301215
Tb427-080066300	3.24326	2.92999	-0.146549
Tb427-070017400	3.23814	3.64463	0.170607
Tb427-100091100	3.23154	3.0213	-0.0970514
Tb427-110075000	3.22509	3.03648	-0.0869367
Tb427-030018900	3.22198	3.18602	-0.0161949
Tb427-070025800	3.22045	2.56883	-0.326149
Tb427-080028400	3.15933	2.07571	-0.606012
Tb427-070052400	3.15816	3.35381	0.0867177
Tb427-100085200	3.15707	2.68526	-0.233526
Tb427-100018100	3.15563	2.97356	-0.0857354
Tb427-110017200	3.14132	2.14138	-0.552828
Tb427-070027000	3.12622	2.79796	-0.160044
Tb427-040015600	3.11461	3.56523	0.194945
Tb427-110169500	3.11383	2.90584	-0.0997364
Tb427-080065400	3.11211	2.74323	-0.182019
Tb427-090044800	3.10876	1.93651	-0.682879
Tb427-010023900	3.1032	2.26342	-0.455253
Tb427-080029600	3.10244	3.28321	0.081703
Tb427-080029500	3.102	3.10467	0.00123777
Tb427-100060100	3.10177	2.70926	-0.195193
Tb427-070042200	3.10055	3.01304	-0.0413072
Tb427-110049700	3.07614	3.57158	0.215441
Tb427-110073800	3.07303	2.96844	-0.0499559
Tb427-100156500	3.0684	2.38367	-0.364304
Tb427-060049300	3.06325	3.43125	0.163672
Tb427-110027200	3.06319	2.39907	-0.352557
Tb427-070050400	3.05858	3.00451	-0.0257305
Tb427-040052800	3.04206	3.52035	0.210672
Tb427-110048100	3.01703	3.01925	0.0010631
Tb427-090036700	3.00993	3.06665	0.0269344
Tb427-060029800	3.00532	2.18779	-0.458049
Tb427-110149600	3.00125	2.5821	-0.217016
Tb427-050044600	2.99535	1.82238	-0.716901
Tb427-100007900	2.99524	3.84062	0.358665
Tb427-030037700	2.99184	2.79331	-0.0990546
Tb427-110107000	2.98398	2.55	-0.226742
Tb427-050026200	2.97748	2.9645	-0.00630466
Tb427-050028800	2.97364	2.77813	-0.098113
Tb427-100097400	2.97356	2.13491	-0.478015
Tb427-090029000	2.96139	2.55964	-0.210333
Tb427-110084000	2.93964	2.22785	-0.399984
Tb427-070081900	2.93889	2.84533	-0.0466776
Tb427-030033800	2.91136	4.19783	0.527949
Tb427-100099100	2.90614	2.26806	-0.357644
Tb427-110150600	2.9049	2.1575	-0.429132
Tb427-100116900	2.90224	3.25743	0.166565
Tb427-110133400	2.89868	2.58709	-0.164068
Tb427-030029600	2.89626	2.19764	-0.398242
Tb427-100008400	2.88147	2.37702	-0.27765
Tb427-050022900	2.88115	2.18546	-0.398709
Tb427-100153700:pseudogene	2.85924	3.2291	0.175503
Tb427-110178000	2.85768	2.37978	-0.264019
Tb427-110105600	2.83304	2.50986	-0.174744
Tb427-100008800	2.83217	3.24417	0.195942
Tb427-070081800	2.82996	2.32446	-0.283889
Tb427-080028600	2.82591	2.34922	-0.266532
Tb427-070054600	2.82115	4.27866	0.600877
Tb427-080048200	2.81368	2.10361	-0.419592
Tb427-110059500	2.80762	2.17612	-0.36759
Tb427-100160500	2.80201	2.98905	0.0932225
Tb427-110084200	2.79948	2.81744	0.00922302
Tb427-030016600	2.79814	2.06262	-0.439989
Tb427-100142600	2.7895	3.17512	0.186804
Tb427-110124300	2.78713	2.33645	-0.25446
Tb427-100033600	2.78394	2.08484	-0.417192
Tb427-010015100	2.77308	2.25564	-0.297952
Tb427-090085400	2.76418	2.60572	-0.0851684
Tb427-070051200	2.75708	2.6705	-0.0460304
Tb427-110150100	2.73468	2.70138	-0.0176721
Tb427-090029800	2.73156	2.27379	-0.264623
Tb427-100162100	2.73007	2.53172	-0.108823
Tb427-080010100	2.71848	2.39437	-0.183153
Tb427-110086200	2.71489	2.69924	-0.00834272
Tb427-100042900	2.71011	2.48211	-0.126781
Tb427-100006500	2.68828	3.03123	0.173219
Tb427-090080200	2.68592	2.68621	0.000154984
Tb427-090047200	2.67413	2.87977	0.106879
Tb427-080009200	2.67264	2.3885	-0.16216
Tb427-060055400	2.664	3.23125	0.278497
Tb427-080018400	2.66213	2.29634	-0.213244
Tb427-040017700	2.66146	2.21075	-0.267682
Tb427-100134200	2.6611	2.64843	-0.00688328
Tb427-080042600	2.65083	2.22436	-0.253056
Tb427-080018300	2.64392	2.30256	-0.199438
ND5	2.63937	2.16723	-0.28434
Tb427-080013500	2.63102	3.32984	0.339829
Tb427-100120100	2.61629	2.12019	-0.303324
Tb427-110028600	2.60774	2.43687	-0.097771
Tb427-070028000	2.60631	2.60657	0.000143024
Tb427-100112400	2.60191	2.51394	-0.0496228
Tb427-050051200	2.59208	2.82627	0.124791
Tb427-100024800	2.56992	3.50064	0.445894
Tb427-110180700	2.56944	2.50112	-0.0388809
Tb427-060032500	2.56271	2.47256	-0.051664
Tb427-030058700	2.55926	2.85954	0.160058
Tb427-090057300	2.55424	1.95647	-0.384637
Tb427-110185900	2.54815	2.54366	-0.00254215
Tb427-070063700	2.54376	2.37138	-0.10124
Tb427-030040400	2.54123	1.81479	-0.48572
Tb427-070055900	2.53231	3.2764	0.37166
Tb427-020013400	2.53059	2.2503	-0.169357
Tb427-070038600	2.5297	2.39959	-0.0761751
Tb427-090044700	2.51148	2.01068	-0.320852
Tb427-050029400	2.50442	2.22458	-0.170945
Tb427-080021700	2.50173	1.97386	-0.341905
Tb427-040021400	2.4957	2.73586	0.132546
Tb427-080022800	2.49539	2.02862	-0.298771
Tb427-090082500	2.49318	1.69652	-0.555404
Tb427-020021800	2.49074	1.89876	-0.391515
Tb427-110031400	2.47728	2.20284	-0.169395
Tb427-100064700	2.46864	2.12012	-0.219567
Tb427-110137800	2.46807	2.28255	-0.112738
Tb427-070047000	2.45603	1.77639	-0.467377
Tb427-040015000	2.45268	2.15643	-0.185714
Tb427-000075100	2.44117	2.27406	-0.102304
Tb427-080088400	2.43654	1.9451	-0.324988
Tb427-110011100	2.43495	2.3231	-0.0678427
Tb427-020032100	2.42624	2.06452	-0.232916
Tb427-110019000	2.42092	2.17123	-0.157042
Tb427-070017200	2.41929	2.20227	-0.13559
Tb427-100069500	2.41542	2.71365	0.167958
Tb427-060055100	2.41029	2.63258	0.127275
Tb427-110103300	2.39931	2.23754	-0.100704
Tb427-080061800	2.39618	1.7924	-0.418839
Tb427-100013900	2.39275	2.18294	-0.132401
Tb427-070045200	2.38551	2.71407	0.186156
Tb427-040022300	2.38512	1.89915	-0.328707
Tb427-010027100	2.37816	2.21719	-0.101111
Tb427-100006200	2.3661	2.05914	-0.200467
Tb427-100016900	2.36168	1.38813	-0.766666
Tb427-110152900	2.35861	2.16677	-0.122393
Tb427-100027900	2.3498	2.39629	0.0282699
Tb427-060009300	2.34966	1.75228	-0.423221
Tb427-050035800	2.33484	1.97898	-0.238568
Tb427-110053300	2.33241	2.10001	-0.151426
Tb427-110129200	2.3292	2.59797	0.157552
Tb427-050032600	2.32904	1.93893	-0.264471
Tb427-110150300	2.32729	2.00671	-0.213819
Tb427-100101600	2.32386	2.08953	-0.153346
Tb427-110066300	2.32342	2.04904	-0.181307
Tb427-090070400	2.32279	2.56296	0.141952
Tb427-040038300	2.32275	2.5793	0.15115
Tb427-080067400	2.32127	2.36062	0.02425
Tb427-100076900	2.31828	2.89445	0.320234
Tb427-100087100	2.31468	2.11297	-0.131536
Tb427-100029900	2.30609	1.8419	-0.324257
Tb427-100135100	2.30304	2.95793	0.361052
Tb427-100018000	2.29929	1.47568	-0.639808
Tb427-020017800	2.29461	2.41637	0.0745871
Tb427-100136100	2.28745	1.67627	-0.448479
Tb427-000663900	2.28505	3.35467	0.553943
Tb427-060052100	2.27441	2.37633	0.0632464
Tb427-100026600	2.27388	2.28154	0.00485196
Tb427-090012800	2.26693	2.50952	0.146669
Tb427-010011700	2.25424	2.35104	0.0606589
Tb427-110067000	2.24742	2.05168	-0.131465
Tb427-110063600	2.24729	2.36584	0.0741668
Tb427-090065900	2.22517	2.2321	0.00448584
Tb427-100077800	2.2246	2.23254	0.00513898
Tb427-020016900	2.2162	1.62461	-0.447989
MURF4	2.21539	1.38626	-0.676363
Tb427-060018300	2.20501	1.81688	-0.279324
Tb427-060039900	2.20387	1.90455	-0.210589
Tb427-070049300	2.20181	1.73608	-0.342857
Tb427-110054100	2.19565	2.92933	0.41592
Tb427-070031100	2.18733	2.65417	0.279089
Tb427-050015700	2.18261	1.96571	-0.151003
Tb427-110049600	2.17517	1.7561	-0.308751
Tb427-110105400	2.17138	1.97787	-0.13466
Tb427-100088800	2.16755	2.27598	0.070427
Tb427-050013400:pseudogene	2.16696	2.13064	-0.0243821
Tb427-110181600	2.16326	1.80601	-0.260396
Tb427-100101500	2.15589	1.75074	-0.300318
Tb427-020013300	2.1554	1.50053	-0.522484
Tb427-050038600	2.15245	1.7374	-0.309051
Tb427-030034700	2.15024	2.02048	-0.0897999
Tb427-080072900	2.14775	1.70183	-0.335745
Tb427-110063300	2.14688	1.51728	-0.500759
Tb427-110152700	2.1404	2.05172	-0.0610486
Tb427-110045300	2.14018	1.53006	-0.484146
Tb427-020031100	2.11862	1.90027	-0.156917
Tb427-010031200	2.10599	1.7389	-0.276326
Tb427-070035000	2.10531	1.06361	-0.985058
Tb427-000110300	2.10482	2.1484	0.0295632
Tb427-100030200	2.10031	1.63113	-0.364736
Tb427-050037700	2.098	2.00162	-0.0678424
Tb427-110122800	2.09771	2.12587	0.0192389
Tb427-100157100	2.08791	2.21832	0.0874072
Tb427-100120400	2.08482	1.8317	-0.186743
Tb427-040006200	2.08149	1.84624	-0.173023
Tb427-080068100	2.06718	1.77705	-0.218184
Tb427-110037400	2.0603	2.10352	0.02995
Tb427-110055600	2.05969	1.96463	-0.0681667
Tb427-090088300	2.04627	2.35818	0.204676
Tb427-040037300	2.04548	1.61376	-0.342014
Tb427-100134800	2.03751	2.51259	0.302366
Tb427-110145300	2.03537	1.44981	-0.489422
Tb427-060009000	2.03507	1.69791	-0.261318
Tb427-070026500	2.03343	1.66561	-0.28787
Tb427-030039700	2.03288	2.25855	0.151872
Tb427-080067200	2.02206	2.16457	0.0982505
Tb427-050035000	2.02125	2.29317	0.182099
Tb427-100087000	2.01755	1.47167	-0.455152
Tb427-080070200	2.0127	1.30021	-0.630383
Tb427-050014000	2.01233	1.59295	-0.337165
Tb427-060041400	2.01158	1.71888	-0.226862
Tb427-070046000	2.00847	1.64186	-0.290765
Tb427-070049600	2.00558	1.68226	-0.25362
Tb427-100078300	2.00548	1.49995	-0.419032
Tb427-090088500	2.00305	2.08573	0.0583507
Tb427-030021500	1.99489	1.57691	-0.339209
Tb427-020017500	1.992	1.25659	-0.664697
Tb427-110158000	1.98964	2.23306	0.16652
Tb427-010016100	1.98649	2.41312	0.280683
Tb427-020026400	1.98495	1.53906	-0.367053
Tb427-080042500	1.98485	1.36218	-0.543116
Tb427-050039000	1.9839	1.69343	-0.228391
Tb427-100037000	1.97974	1.67566	-0.240578
Tb427-070049900	1.97922	2.36006	0.253897
Tb427-080049200	1.97861	1.29155	-0.61539
Tb427-090031400	1.975	1.92594	-0.0362896
Tb427-080065700	1.9747	2.01408	0.0284867
Tb427-050051600	1.96944	1.60253	-0.297436
Tb427-010012000	1.96885	1.38017	-0.512511
Tb427-110070000	1.96734	1.97144	0.00300771
Tb427-030031900	1.96474	1.7886	-0.135506
Tb427-080005100:pseudogene	1.96118	3.86154	0.977454
Tb427-070026300	1.96065	1.51311	-0.373816
Tb427-100041000	1.96015	1.35551	-0.532124
Tb427-100049700	1.95433	1.51505	-0.367308
Tb427-100061800	1.95352	2.16504	0.148317
Tb427-110160900	1.95097	1.44548	-0.432645
Tb427-060049900	1.94738	1.40932	-0.466531
Tb427-030016500	1.9427	1.60646	-0.274184
Tb427-110131300	1.94197	2.00355	0.0450385
Tb427-090065500	1.94113	1.64443	-0.239312
Tb427-110034300	1.93919	1.72719	-0.167027
Tb427-100105600	1.93462	2.16344	0.161273
Tb427-020029800	1.93393	2.51838	0.380963
Tb427-070019000	1.92522	1.88598	-0.0297116
Tb427-040027000	1.92355	1.70389	-0.174943
Tb427-090032800	1.91726	1.66856	-0.200445
Tb427-100043900	1.91534	2.58776	0.434102
Tb427-080039100	1.90484	1.51475	-0.330597
Tb427-020020100	1.90424	1.54422	-0.302342
Tb427-060010600	1.90368	1.92996	0.0197795
Tb427-110010500	1.90313	1.3938	-0.449351
Tb427-110127800	1.90302	1.94	0.0277705
Tb427-060014500	1.90243	2.04573	0.104774
Tb427-100145300	1.90231	1.68605	-0.174105
Tb427-060052900	1.90047	2.03086	0.095731
Tb427-110031600	1.89931	1.68091	-0.176232
Tb427-080043300	1.89837	2.12361	0.161761
Tb427-090011600	1.89292	1.63569	-0.210719
Tb427-100149100	1.89077	1.39173	-0.442093
Tb427-100011100	1.88754	1.80117	-0.0675728
Tb427-100116100	1.88667	2.08663	0.145334
Tb427-020021600	1.88482	1.241	-0.602922
Tb427-100018900	1.88077	1.52107	-0.306235
Tb427-070041200	1.87917	1.40707	-0.417405
Tb427-100170600	1.87494	1.89203	0.0130913
Tb427-110105500	1.87309	2.23706	0.25619
Tb427-100048300	1.87094	1.84791	-0.0178665
Tb427-040023100	1.86721	1.99203	0.0933548
Tb427-100095100	1.85477	1.48546	-0.320333
Tb427-080021200	1.84585	1.77468	-0.0567327
Tb427-040024200	1.84373	2.1438	0.217543
Tb427-090058900	1.84361	1.46624	-0.330405
Tb427-060012900	1.84022	1.46052	-0.333395
Tb427-020020500	1.83984	1.46418	-0.329485
Tb427-070011800	1.83515	1.35557	-0.436993
Tb427-070026100	1.83334	1.47603	-0.312758
Tb427-100014700	1.83247	1.99089	0.11962
Tb427-080065500	1.83189	1.35555	-0.434456
Tb427-080053300	1.83118	1.50617	-0.281884
Tb427-080047700	1.8251	1.38294	-0.400241
Tb427-020030800	1.8228	2.11628	0.215373
Tb427-110096500	1.82115	1.90601	0.0657062
Tb427-060009700	1.81767	1.80552	-0.00967871
Tb427-060035100	1.81645	1.50014	-0.276028
Tb427-080081600	1.81282	1.97246	0.121767
Tb427-090055900	1.80994	1.8396	0.0234546
Tb427-100006100	1.80962	1.50349	-0.267371
Tb427-100077100	1.80733	1.31476	-0.459058
Tb427-080080100	1.80509	1.83723	0.0254609
Tb427-110035000	1.80123	1.91186	0.0860011
Tb427-090049800	1.80079	1.66204	-0.115669
Tb427-100081000	1.79563	1.6029	-0.163807
Tb427-060023000	1.79466	1.69911	-0.078933
Tb427-100122100	1.79318	2.11857	0.240567
Tb427-070053500	1.79306	1.47238	-0.284282
Tb427-070076700	1.79195	1.42282	-0.332775
Tb427-090042600	1.78356	2.17751	0.287917
Tb427-100160400	1.77923	1.39638	-0.349563
Tb427-110172200	1.77626	1.63773	-0.117144
Tb427-010022300	1.77565	1.76375	-0.00970448
Tb427-040040200	1.77278	1.86193	0.0707912
Tb427-090080100	1.76825	1.09978	-0.685106
Tb427-100044000	1.76801	2.02873	0.19845
Tb427-080048100	1.76799	1.14769	-0.623372
Tb427-100033500	1.76202	1.4144	-0.317042
Tb427-110184300	1.76165	1.31433	-0.422601
Tb427-040023200	1.75818	2.01155	0.194228
Tb427-030056900	1.75438	1.58775	-0.143974
Tb427-100032500	1.74828	1.4598	-0.260167
Tb427-080017800	1.74703	1.8218	0.0604581
Tb427-110029200	1.74574	1.3442	-0.377089
Tb427-110051100	1.7456	2.29989	0.397838
Tb427-110027300	1.74366	1.52336	-0.194859
Tb427-070055400	1.74217	1.143	-0.608052
Tb427-070040900	1.7401	1.42806	-0.285115
Tb427-050017000	1.74001	1.56871	-0.149521
Tb427-080072600	1.73765	2.17592	0.324486
Tb427-010020500	1.73524	1.07705	-0.688046
Tb427-090065300	1.73437	1.49953	-0.209908
Tb427-100160100	1.73408	0.95196	-0.865201
Tb427-100041200	1.72642	1.58714	-0.121355
Tb427-110045200	1.72619	1.65763	-0.0584664
Tb427-060051100	1.72527	1.59023	-0.117579
Tb427-100024400	1.72244	1.8835	0.128963
Tb427-100105100	1.72002	1.40543	-0.291414
Tb427-010006600:pseudogene	1.71707	1.66636	-0.0432497
Tb427-100054400	1.71413	1.73358	0.0162825
Tb427-060025300	1.71358	1.21276	-0.498728
Tb427-040021600	1.70922	1.39206	-0.296119
Tb427-100153200	1.70591	1.80656	0.08271
Tb427-060051900	1.70319	1.1867	-0.521291
Tb427-070050200	1.70073	1.43387	-0.246232
Tb427-080057900	1.70048	1.63617	-0.0556216
Tb427-100145900	1.69912	1.71199	0.0108816
Tb427-100102600	1.69879	1.62028	-0.0682596
Tb427-110081600	1.69407	1.33317	-0.345626
Tb427-020019800	1.69039	1.46176	-0.209646
Tb427-010020200	1.67853	1.30811	-0.359716
Tb427-060046200	1.67762	1.1048	-0.602631
Tb427-050038800	1.67726	1.15767	-0.534883
Tb427-100047100	1.67559	1.3841	-0.275725
Tb427-110188000	1.67253	1.74746	0.0632299
Tb427-040029900	1.67196	1.57972	-0.0818726
Tb427-100089200	1.67159	1.85321	0.148804
Tb427-040049300	1.67086	1.51439	-0.141852
Tb427-040006400	1.66572	1.24003	-0.425775
Tb427-110041000	1.66389	1.91843	0.205364
Tb427-030013400	1.66257	1.75188	0.0754894
Tb427-010019800	1.66247	1.38485	-0.263591
Tb427-080008900	1.66141	1.61405	-0.0417191
Tb427-110125400	1.66034	1.52586	-0.121851
Tb427-100073300	1.65543	1.21166	-0.450226
Tb427-100086000	1.65069	1.42014	-0.217038
Tb427-110035300	1.65025	1.43974	-0.19687
Tb427-020011600	1.64689	1.84781	0.166076
Tb427-110020300	1.6461	1.4968	-0.137173
Tb427-060010400	1.64203	1.52976	-0.102183
Tb427-060032000	1.64198	1.37553	-0.25545
Tb427-100094000	1.63961	1.834	0.161641
Tb427-100015300	1.63868	1.40024	-0.22686
Tb427-090043300	1.63592	1.38964	-0.235386
Tb427-040025600	1.63542	0.97834	-0.741256
Tb427-050016800	1.63383	1.34986	-0.275443
Tb427-110134300	1.6326	1.39789	-0.223918
Tb427-010005800	1.63232	1.63142	-0.00079506
Tb427-100109500	1.63191	1.58118	-0.0455604
Tb427-030048400	1.63179	1.82408	0.160712
Tb427-110134000	1.6313	2.17765	0.416752
Tb427-110048200	1.62818	1.77534	0.124833
Tb427-110159000	1.62529	1.22865	-0.403615
Tb427-110081700	1.62527	1.21603	-0.418496
Tb427-020022500	1.61707	1.55312	-0.0582164
Tb427-110147700	1.61587	1.7341	0.101875
Tb427-080067300	1.61044	1.7313	0.1044
Tb427-110096300	1.60298	1.32522	-0.274529
Tb427-080082100	1.60168	0.892904	-0.843007
Tb427-110018200	1.60151	1.16352	-0.460937
Tb427-040024600	1.60119	1.85885	0.215268
Tb427-110029900	1.60025	0.925468	-0.790044
Tb427-100014600	1.59885	2.03465	0.347746
Tb427-110021200	1.59803	1.51189	-0.0799429
Tb427-110121900	1.59294	1.11477	-0.514946
Tb427-100159900	1.59139	1.42543	-0.158892
Tb427-080052900	1.59132	1.28049	-0.313528
Tb427-020017700	1.59066	1.94183	0.287792
Tb427-070073700	1.59029	1.70681	0.102015
Tb427-110041300	1.588	1.80915	0.188105
Tb427-110055100	1.58448	1.42218	-0.155899
Tb427-060030400	1.58424	1.97317	0.316725
Tb427-110023100	1.58247	1.70508	0.107658
Tb427-060049800	1.57936	1.66819	0.0789496
Tb427-030045000	1.57272	1.28997	-0.285925
Tb427-010014300	1.57266	1.15637	-0.443608
Tb427-030010800	1.57182	1.83467	0.223086
Tb427-110027500	1.57027	1.40849	-0.156859
Tb427-050012400	1.57003	1.7007	0.115331
Tb427-100162200	1.56876	1.20344	-0.382462
Tb427-080006700	1.56762	1.05068	-0.577254
Tb427-100011600	1.5597	1.414	-0.141487
Tb427-080063000	1.55924	1.14002	-0.451785
Tb427-060036900	1.55716	1.68752	0.115988
Tb427-060050100	1.55655	1.50551	-0.0480969
Tb427-100089600	1.55371	1.45957	-0.0901754
Tb427-110104400	1.55331	1.40235	-0.147498
Tb427-030042200	1.54995	1.28053	-0.275483
Tb427-070054700	1.54868	2.02309	0.385521
Tb427-100127800	1.54575	1.37304	-0.17093
Tb427-080056400	1.54499	1.64843	0.0934959
Tb427-100144500	1.54443	1.45685	-0.0842193
Tb427-100117900	1.54378	1.93808	0.328162
Tb427-090043100	1.54044	1.62783	0.0796105
Tb427-050025600	1.54038	1.27973	-0.267443
Tb427-040040800	1.53816	1.18831	-0.372296
Tb427-100170400	1.53638	1.09033	-0.494761
Tb427-100079300	1.52989	1.77213	0.212052
Tb427-110028500	1.52914	1.42816	-0.0985574
Tb427-100085500	1.5277	1.5375	0.00922272
Tb427-080040700	1.52643	1.21878	-0.324721
Tb427-100033200	1.52417	0.908257	-0.746849
Tb427-090056500	1.51836	1.29864	-0.225512
Tb427-100100500	1.51511	1.78573	0.237089
Tb427-080077300	1.51343	1.13042	-0.420968
Tb427-100058800	1.51131	1.33182	-0.182406
Tb427-080035500	1.51096	1.60372	0.0859624
Tb427-100011900	1.50772	1.05275	-0.518204
Tb427-060009600	1.50265	1.27914	-0.232339
Tb427-110047200	1.49806	1.45804	-0.0390607
Tb427-050052200	1.49684	1.56227	0.0617276
Tb427-020008700	1.49642	1.60791	0.103665
Tb427-020021300	1.48856	1.22803	-0.277566
Tb427-070005700	1.48843	1.13257	-0.394197
Tb427-070069900	1.4884	1.362	-0.128031
Tb427-100133300	1.4859	1.35082	-0.137502
Tb427-070026700	1.48264	1.40102	-0.081689
Tb427-090016200	1.48083	1.39554	-0.0855813
Tb427-110158600	1.47497	1.78984	0.27914
Tb427-060048800	1.46969	1.40013	-0.0699457
Tb427-110182400	1.46807	1.83629	0.322869
Tb427-090044400	1.46658	1.3093	-0.163659
Tb427-050035900	1.46655	1.32623	-0.145093
Tb427-030024500	1.46617	1.3487	-0.120487
Tb427-090088600	1.46314	1.62045	0.147322
Tb427-100029600	1.4586	1.39012	-0.0693771
Tb427-070059100	1.45714	1.40758	-0.049925
Tb427-110160100	1.45615	1.32949	-0.131286
Tb427-040043200	1.4552	1.29295	-0.170561
Tb427-050015300	1.45465	1.53712	0.0795589
Tb427-070014200	1.45389	1.61098	0.148027
Tb427-010026900	1.44905	0.736079	-0.977174
Tb427-110132400	1.4485	1.27567	-0.183305
Tb427-100099700	1.44746	1.2079	-0.261023
Tb427-110163900	1.44562	1.46706	0.0212363
Tb427-090024400	1.44308	1.64709	0.190769
Tb427-080066600	1.43689	1.75899	0.291796
Tb427-030053200:pseudogene	1.43683	1.53732	0.0975272
Tb427-110124600	1.43395	1.29688	-0.144955
Tb427-110085600	1.43348	1.24708	-0.20096
Tb427-110020100	1.43317	1.33551	-0.10182
Tb427-100084700	1.43181	1.04201	-0.458476
Tb427-100005300	1.43131	1.69023	0.239884
Tb427-100168800	1.43033	1.25212	-0.191973
Tb427-020027500	1.42978	1.27199	-0.168703
Tb427-100153600	1.42854	1.31272	-0.121982
Tb427-090006700	1.4271	1.4446	0.0175804
Tb427-080035400	1.42576	1.59382	0.160756
Tb427-100156000	1.42484	1.67277	0.23144
Tb427-110168700	1.4233	1.0198	-0.480963
Tb427-010008000	1.42296	0.968158	-0.555576
Tb427-110110200	1.42095	1.55459	0.129676
Tb427-080011900	1.41649	1.37587	-0.0419793
Tb427-090028800	1.41622	2.1473	0.60048
Tb427-110093900	1.41582	1.05227	-0.428129
Tb427-020011800	1.41497	2.09225	0.564284
Tb427-000730800	1.41411	0.919523	-0.620936
Tb427-060055900	1.4116	1.19717	-0.237711
Tb427-070039700	1.40963	1.59219	0.17569
Tb427-090089600	1.40917	1.70985	0.279027
Tb427-080037000	1.40902	0.915092	-0.622699
Tb427-050040000	1.40881	0.88554	-0.669848
Tb427-100042500	1.40661	0.73603	-0.934381
Tb427-100057700	1.40658	1.78881	0.346814
Tb427-100027100	1.40191	1.06657	-0.394418
Tb427-110147000	1.40173	1.02445	-0.452361
Tb427-100149800	1.40164	1.45234	0.0512627
Tb427-020006900	1.39706	1.36293	-0.0356802
Tb427-030057500	1.39633	0.853364	-0.710408
Tb427-070021000:pseudogene	1.39478	1.30872	-0.0918798
Tb427-110035700	1.39249	1.01462	-0.456733
Tb427-060011900	1.39189	0.991617	-0.489185
Tb427-100040200	1.38978	0.998751	-0.476662
Tb427-080023200	1.38926	1.4897	0.100709
Tb427-040009400	1.38921	0.875328	-0.666371
Tb427-100024600	1.3864	1.69821	0.292666
Tb427-110083700	1.38627	1.48849	0.102644
Tb427-040015900	1.38568	1.03058	-0.427142
Tb427-090051000	1.38458	1.07562	-0.364282
Tb427-080029400	1.38353	1.18733	-0.220638
Tb427-020027400	1.38303	1.18094	-0.227908
Tb427-110066200	1.38126	1.24372	-0.151327
Tb427-080046300	1.37895	1.05669	-0.384015
Tb427-030032600	1.37879	1.37956	0.00081356
Tb427-050040500	1.37744	1.17838	-0.225185
Tb427-080048700	1.37675	0.926718	-0.571066
Tb427-100119600	1.37438	1.49727	0.123551
Tb427-110011800	1.37299	1.14673	-0.259785
Tb427-110101800	1.36674	1.21656	-0.167937
Tb427-060020800:pseudogene	1.36478	1.69727	0.314551
Tb427-100104800	1.36477	1.47683	0.113837
Tb427-090089200	1.36392	1.53573	0.171163
Tb427-110128000	1.36354	0.976345	-0.481898
Tb427-100031800	1.36345	1.28849	-0.0815818
Tb427-100154300	1.36288	1.70557	0.323597
Tb427-070077500	1.36221	1.15084	-0.243256
Tb427-000811300	1.36125	1.36864	0.00780502
Tb427-100065000	1.36113	0.969752	-0.489113
Tb427-110082700	1.35983	1.08744	-0.322491
Tb427-070063400	1.35977	1.11232	-0.289794
Tb427-070069100	1.35875	1.73434	0.352101
Tb427-100017800	1.35654	1.43737	0.0835049
Tb427-100032100	1.35615	0.919869	-0.560015
Tb427-070026000	1.35494	1.40682	0.0542129
Tb427-040023500	1.35444	1.76385	0.381031
Tb427-080007300	1.35439	1.22534	-0.144459
Tb427-100138900	1.35347	0.886783	-0.61001
Tb427-100149600	1.35299	1.21787	-0.151792
Tb427-080027700	1.34938	0.772656	-0.804401
Tb427-040021100	1.34791	1.30482	-0.046866
Tb427-050044800	1.34283	1.0253	-0.389227
Tb427-090018600	1.34122	1.62961	0.280977
Tb427-080056200	1.34076	1.1592	-0.209917
Tb427-020023700	1.33897	1.43314	0.0980507
Tb427-020031600	1.33767	1.33395	-0.00401216
Tb427-070078200	1.33754	1.12175	-0.253837
Tb427-100157700:pseudogene	1.33511	1.4529	0.121972
Tb427-040012900	1.33143	1.35648	0.0268957
Tb427-110183600	1.33137	1.13599	-0.22896
Tb427-110189600	1.32856	1.50151	0.176552
Tb427-050038900	1.3277	1.18698	-0.161628
Tb427-050024500	1.32761	1.34342	0.0170755
Tb427-100046100	1.32664	1.36896	0.0453034
Tb427-090082700	1.32579	0.816477	-0.699364
Tb427-020007900	1.32541	0.980375	-0.435038
Tb427-080045300	1.32428	1.15171	-0.201429
Tb427-100107300	1.32353	1.47223	0.153614
Tb427-090012200	1.32185	1.26627	-0.0619776
Tb427-090086800:pseudogene	1.32002	1.54286	0.225047
Tb427-050009400	1.31391	0.959001	-0.454262
Tb427-100026100	1.31361	0.932171	-0.494868
Tb427-000754800	1.31334	1.54648	0.235745
Tb427-060026300	1.31304	1.12696	-0.220477
Tb427-110150700	1.31147	1.07564	-0.285993
Tb427-070055700	1.31097	1.79988	0.457262
Tb427-090061700	1.31064	1.37941	0.0737867
Tb427-070067600	1.31039	1.73934	0.408545
Tb427-060029100	1.30957	1.14211	-0.197401
Tb427-060017900	1.30825	0.953136	-0.456885
Tb427-030041800	1.3075	1.47033	0.16933
Tb427-100146000	1.30319	1.35601	0.0573235
Tb427-080031600	1.30183	1.42953	0.134991
Tb427-110078600	1.30069	1.1063	-0.233533
Tb427-040007500	1.29985	1.06999	-0.280745
Tb427-110029600	1.29927	1.21793	-0.0932679
Tb427-100149700:pseudogene	1.29594	0.900331	-0.525468
Tb427-100157500	1.29549	1.37616	0.0871559
Tb427-030030900	1.29296	1.06572	-0.27885
Tb427-050022300	1.29085	1.36662	0.0822902
Tb427-090043000	1.2866	1.41869	0.141003
Tb427-090060100	1.2863	1.24166	-0.0509511
Tb427-110159500	1.28556	1.16267	-0.144951
Tb427-050030700	1.28548	1.12061	-0.198021
Tb427-100167100	1.28543	0.957787	-0.424473
Tb427-080075200	1.28474	1.09236	-0.234037
Tb427-100060900	1.2844	0.921433	-0.479139
Tb427-110098500	1.28083	1.02402	-0.322833
Tb427-040006600	1.2805	0.977969	-0.38885
Tb427-100073000	1.2797	0.974417	-0.39319
Tb427-100151600	1.27927	0.869669	-0.556784
Tb427-020032000	1.27824	1.25379	-0.0278612
Tb427-090063300	1.2772	1.52089	0.251937
Tb427-100058600	1.27239	1.34223	0.0770866
Tb427-110005500	1.27197	1.01269	-0.328862
Tb427-040022800	1.27129	1.41308	0.152545
Tb427-070031000	1.26772	1.78498	0.493669
Tb427-110069300	1.26557	1.4213	0.167417
Tb427-100011300	1.26343	1.1257	-0.166515
Tb427-070041500	1.26335	1.19352	-0.0820311
Tb427-050021000	1.26299	1.53193	0.278513
Tb427-030029400	1.26244	1.04984	-0.266045
Tb427-070029600	1.26035	1.11065	-0.182428
Tb427-060031500	1.25993	1.03379	-0.2854
Tb427-030008300	1.25979	1.21321	-0.0543491
Tb427-090039900	1.25919	1.15199	-0.128366
Tb427-110185100	1.25818	1.24853	-0.011105
Tb427-070028200	1.25554	1.18138	-0.0878383
Tb427-100031000	1.25496	1.33182	0.0857581
Tb427-110082300	1.25447	1.14599	-0.130493
Tb427-010016900	1.25352	1.52992	0.287469
Tb427-090063000	1.2526	1.36147	0.120238
Tb427-100152600	1.25223	1.14178	-0.133219
Tb427-080079300:pseudogene	1.25024	1.028	-0.28236
Tb427-110008500	1.24844	1.23969	-0.0101475
Tb427-000752900	1.24743	1.30084	0.0604812
Tb427-070042400	1.24688	1.6141	0.372402
Tb427-060018200	1.24613	1.23235	-0.0160479
Tb427-080030800	1.24581	1.19257	-0.0630115
Tb427-100014800	1.24526	1.30234	0.0646616
Tb427-080027800	1.24345	1.12676	-0.142171
Tb427-110049300	1.23996	1.41348	0.18896
Tb427-080081100:pseudogene	1.23909	1.12145	-0.143914
Tb427-080009300	1.2379	1.02797	-0.268088
Tb427-030033900	1.23731	1.21282	-0.0288355
Tb427-070072200	1.23482	1.17649	-0.0698138
Tb427-050041600	1.23482	1.01067	-0.288982
Tb427-010011800	1.23447	1.3994	0.180917
Tb427-030022800	1.23385	1.24177	0.00922338
Tb427-100090000	1.23333	0.888218	-0.473577
Tb427-100170800	1.23157	1.07029	-0.202496
Tb427-100066200	1.22971	1.48462	0.271771
Tb427-080065900	1.22704	0.986168	-0.315279
Tb427-050020500	1.22407	1.39604	0.189649
Tb427-110151400	1.22403	1.19831	-0.0306427
Tb427-040023000	1.22235	0.809377	-0.594776
Tb427-040048000	1.22108	0.943839	-0.371551
Tb427-010020100	1.22087	0.87914	-0.473749
Tb427-110099900	1.22049	1.11398	-0.131734
Tb427-100026700	1.21751	1.17614	-0.0498736
Tb427-090072700	1.21655	1.38607	0.188201
Tb427-070082300	1.21325	1.1905	-0.0273101
Tb427-070028500	1.21198	1.01211	-0.260001
Tb427-070044800	1.21095	1.13457	-0.093992
Tb427-100017000	1.20543	0.921897	-0.386875
Tb427-050031700	1.2032	0.768901	-0.646002
Tb427-070032300	1.20273	1.53641	0.353255
Tb427-090007000	1.20244	1.21846	0.0190929
Tb427-030015300	1.19859	0.986916	-0.280342
Tb427-080065800	1.19856	1.1288	-0.0865119
Tb427-100150100	1.19763	1.04138	-0.201692
Tb427-100116300	1.19586	1.51385	0.340179
Tb427-110011000	1.19542	1.21608	0.0247204
Tb427-100105500	1.19528	0.877329	-0.446156
Tb427-110134800	1.19441	1.21135	0.0203223
Tb427-050037400	1.19378	0.964714	-0.307358
Tb427-110110100	1.19127	1.24044	0.058354
Tb427-010007800	1.19058	1.19834	0.00936672
Tb427-110138800	1.19057	1.28391	0.108887
Tb427-100017200:pseudogene	1.1891	0.865404	-0.458419
Tb427-110054200	1.18903	1.45952	0.295708
Tb427-110173100	1.18884	0.883909	-0.427592
Tb427-020008000	1.18789	0.825575	-0.524925
Tb427-090053900	1.18533	1.14439	-0.0507124
Tb427-040030100	1.1849	1.01905	-0.217541
Tb427-090032200	1.18473	1.06248	-0.157123
Tb427-110166200	1.18412	0.808544	-0.550416
Tb427-080020500	1.1816	1.3208	0.16067
Tb427-050016400	1.18151	1.08092	-0.128371
Tb427-050009100	1.18061	1.31649	0.157162
Tb427-050007400	1.18059	1.46998	0.316287
Tb427-030019100	1.17957	1.07198	-0.137995
Tb427-070040500	1.17763	0.837878	-0.491071
Tb427-050020400	1.1767	1.17196	-0.00581573
Tb427-110015000	1.17639	1.00663	-0.22484
Tb427-110040000	1.17228	1.18538	0.0160409
Tb427-040009100	1.17091	0.990844	-0.240901
Tb427-100072900	1.17083	1.04317	-0.166553
Tb427-080082000	1.1698	0.836412	-0.483979
Tb427-100083600	1.16915	0.997755	-0.228704
Tb427-050043500	1.16705	1.49861	0.36076
Tb427-110027400	1.16681	1.19819	0.0382884
Tb427-050044900	1.16625	0.685922	-0.76576
Tb427-070022200	1.16603	0.890374	-0.389118
Tb427-090039000	1.16582	1.12364	-0.0531739
Tb427-060045000	1.16527	0.974928	-0.257301
Tb427-080026300:pseudogene	1.16527	1.05353	-0.145431
Tb427-030020700	1.1641	1.13039	-0.0423878
Tb427-100077200	1.16207	1.04569	-0.152237
Tb427-100040000	1.16149	1.08034	-0.104485
Tb427-110149700	1.16116	1.37653	0.245469
Tb427-020024300	1.16041	0.971939	-0.255695
Tb427-100088900	1.15934	1.07225	-0.112664
Tb427-090056100	1.15833	0.914917	-0.340331
Tb427-000832000	1.15794	1.2069	0.0597493
Tb427-100078900	1.15749	1.32783	0.198075
Tb427-020016800	1.15685	1.26945	0.133996
Tb427-030058400	1.15571	1.09272	-0.0808625
Tb427-100035500	1.15535	0.647386	-0.835627
Tb427-110104700	1.15518	1.36242	0.238054
Tb427-110058500	1.15376	1.27479	0.143916
Tb427-040007800	1.15258	0.875023	-0.397481
Tb427-020019600	1.14809	0.843376	-0.444993
Tb427-090046900	1.14417	0.8653	-0.403027
Tb427-080047000	1.14406	0.95809	-0.255926
Tb427-100131700	1.14377	0.798569	-0.518313
Tb427-070010400	1.14377	1.04382	-0.131922
Tb427-060054800	1.14294	1.34693	0.236925
Tb427-110170100	1.14129	1.49954	0.393846
Tb427-100161700	1.14089	0.959609	-0.249641
Tb427-070072400	1.14046	1.17195	0.0392957
Tb427-100104300	1.13951	1.06342	-0.0996995
Tb427-080031100	1.13883	1.03622	-0.136223
Tb427-110135100	1.13771	0.840683	-0.436493
Tb427-100133900:pseudogene	1.1339	1.13235	-0.0019705
Tb427-110042800	1.13214	1.47653	0.383153
Tb427-110082500	1.12995	1.04269	-0.115942
Tb427-110012200	1.1282	1.16233	0.0429937
Tb427-080057300	1.12819	0.822101	-0.456617
Tb427-090090100	1.12767	1.27703	0.179449
Tb427-110088000	1.12755	1.20412	0.0947929
Tb427-100079200	1.12658	1.26496	0.167146
Tb427-110049900	1.12616	1.29869	0.205647
Tb427-100083400	1.1248	0.869153	-0.371982
Tb427-110080700	1.12441	1.16957	0.0568059
Tb427-090063500	1.12238	1.26012	0.166994
Tb427-100157800	1.12105	1.21867	0.120462
Tb427-100095700	1.12021	0.812543	-0.463258
Tb427-030020200	1.11934	0.891314	-0.328644
Tb427-090025200	1.11843	1.02163	-0.130609
Tb427-060042700	1.11835	0.788461	-0.504266
Tb427-110078000	1.11477	0.882206	-0.337553
Tb427-110109100	1.11434	0.811294	-0.457896
Tb427-100032800	1.11309	1.18476	0.0900242
Tb427-030032800	1.11261	1.12103	0.0108847
Tb427-100070900	1.11235	0.56886	-0.96747
Tb427-100052900	1.11225	0.962755	-0.208244
Tb427-090036200	1.11136	1.00362	-0.147115
Tb427-080050800	1.11094	1.30341	0.230506
Tb427-080060100	1.10741	1.39001	0.327907
Tb427-100083700	1.10625	0.567327	-0.963428
Tb427-090088400	1.10569	1.51787	0.457099
Tb427-100019400	1.10495	0.963163	-0.198135
Tb427-110182300	1.10364	0.964716	-0.194091
Tb427-090049500	1.10252	0.739762	-0.575677
Tb427-080010000	1.10171	0.889652	-0.30843
Tb427-090030900	1.10137	0.733117	-0.587184
Tb427-110027900	1.10012	1.00949	-0.124029
Tb427-010014500	1.09922	0.973076	-0.175849
Tb427-090050100	1.09891	0.701651	-0.647252
Tb427-090081000	1.09671	0.833739	-0.395517
Tb427-100054200	1.09608	1.58169	0.529119
Tb427-020025500	1.09476	1.176	0.103284
Tb427-110145700	1.09315	1.83204	0.744961
Tb427-110135500	1.09286	1.19124	0.124348
Tb427-070021900	1.09187	1.6922	0.632098
Tb427-090080400	1.09122	0.656201	-0.733728
Tb427-090046700	1.08968	1.08444	-0.00696049
Tb427-050026500:pseudogene	1.08902	0.957778	-0.185267
Tb427-070076600	1.08749	0.988344	-0.137911
Tb427-080076200	1.08698	1.2069	0.15098
Tb427-040009500	1.08619	1.04865	-0.0507421
Tb427-070067500	1.08615	0.997466	-0.122881
Tb427-030042500	1.08595	0.861992	-0.333218
Tb427-040020700	1.08388	0.943588	-0.199982
Tb427-080061200	1.08067	1.08545	0.00636527
Tb427-010023800	1.07802	1.05534	-0.030673
Tb427-040009600	1.07685	0.888561	-0.277277
Tb427-020022200	1.07684	0.90963	-0.243456
Tb427-110051000	1.0754	1.26238	0.231267
Tb427-110085400	1.07396	1.36185	0.342626
Tb427-080019600	1.07325	0.846429	-0.342523
Tb427-110058100	1.07299	0.926046	-0.212475
Tb427-060009900	1.07298	1.28767	0.263146
Tb427-110099500	1.07223	0.938756	-0.191798
Tb427-050045100	1.07199	0.822111	-0.382882
Tb427-040041800	1.07171	0.799846	-0.422122
Tb427-100038600	1.07082	1.16755	0.124766
Tb427-110134100	1.06847	1.3788	0.367867
Tb427-100045700	1.06522	1.26439	0.247284
Tb427-090038700	1.0651	1.2553	0.237043
Tb427-100054300	1.06484	1.25081	0.232219
Tb427-030033600	1.06461	1.32393	0.314503
Tb427-110067400	1.06397	1.12557	0.0811955
Tb427-040052500	1.06318	0.993813	-0.0973416
Tb427-100064500	1.0617	0.982904	-0.11125
Tb427-060016200	1.06113	1.0612	0.000105406
Tb427-100034100	1.06105	0.678267	-0.645566
Tb427-090030600	1.06009	1.03518	-0.0343007
Tb427-100165700	1.05762	0.99585	-0.0868187
Tb427-110073000	1.05672	0.71428	-0.565033
Tb427-080079700	1.05647	1.03501	-0.0296143
Tb427-100068100	1.05645	0.890704	-0.2462
Tb427-110037900	1.0554	1.40687	0.414699
Tb427-110171100	1.05492	0.878834	-0.263468
Tb427-080049400	1.05225	0.757265	-0.474604
Tb427-020018900	1.05161	1.00737	-0.0619996
Tb427-070053300	1.05144	0.968316	-0.118815
Tb427-040026600	1.05136	1.08568	0.0463451
Tb427-070005900	1.05118	1.05919	0.0109535
Tb427-110162200	1.051	0.884294	-0.24916
Tb427-040041300	1.05057	0.632773	-0.731409
Tb427-110057000	1.05025	0.568453	-0.885628
Tb427-090074800	1.04995	1.11668	0.0888956
Tb427-110066400	1.04929	1.06791	0.0253745
Tb427-110141200	1.04818	0.841597	-0.316689
Tb427-060054900	1.04797	0.919696	-0.188375
Tb427-100096100	1.04768	0.9648	-0.118901
Tb427-040040600	1.04694	0.83044	-0.334237
Tb427-090015000	1.04686	0.743055	-0.494528
Tb427-110006500	1.04553	0.75469	-0.470277
Tb427-090012600	1.04487	1.04487	1.16348e-06
Tb427-090044000	1.04465	1.00402	-0.0572286
Tb427-060043800	1.04382	1.06315	0.026482
Tb427-110062300	1.04346	1.07734	0.0460887
Tb427-110015400	1.0422	1.15564	0.149065
Tb427-070076900	1.04164	0.587264	-0.82677
Tb427-100038800	1.0407	1.17008	0.169054
Tb427-070012600	1.04059	0.919204	-0.178943
Tb427-030018700	1.03942	0.99617	-0.0613118
Tb427-090063400	1.03935	0.99289	-0.0659771
Tb427-110022100	1.03859	1.15547	0.153856
Tb427-100014900	1.03774	1.12239	0.113139
Tb427-050006700	1.03675	1.1877	0.196095
Tb427-090019500	1.03616	0.941771	-0.1378
Tb427-110030300	1.03612	0.850013	-0.285631
Tb427-010016300	1.03566	1.80384	0.800527
Tb427-060039700	1.03478	1.25009	0.272709
Tb427-100116000	1.03414	1.01115	-0.0324357
Tb427-100127700	1.03245	0.719713	-0.52058
Tb427-110023000	1.03104	1.28444	0.317031
Tb427-070013200	1.03064	1.30574	0.341337
Tb427-110070100	1.02911	1.2086	0.231943
Tb427-110009500	1.02819	1.28977	0.327003
Tb427-020017600	1.02786	1.08256	0.0748067
Tb427-090008900	1.02557	1.07324	0.0655434
Tb427-050047200	1.02517	0.795274	-0.366335
Tb427-050011800	1.02473	1.20241	0.230687
Tb427-060026600:pseudogene	1.02392	1.1976	0.226038
Tb427-070014900	1.0234	0.850677	-0.266686
Tb427-040028900	1.02332	0.865388	-0.241836
Tb427-050050200:pseudogene	1.02303	0.786106	-0.380053
Tb427-060009500	1.02218	1.04181	0.0274412
Tb427-110169300	1.0207	0.852955	-0.259014
Tb427-020012700	1.02068	0.924076	-0.143454
Tb427-100005200	1.01961	1.21791	0.256387
Tb427-050026100	1.01905	0.88445	-0.204371
Tb427-090008400	1.01879	0.960847	-0.0844757
Tb427-100091000	1.01868	0.817452	-0.317501
Tb427-070048300	1.01826	0.913301	-0.15694
Tb427-090078800	1.01815	1.02856	0.0146738
Tb427-080006300	1.01658	0.600307	-0.759949
Tb427-060046000	1.0162	0.857854	-0.244382
Tb427-080038300	1.01607	0.737561	-0.462165
Tb427-090045900	1.01552	0.692818	-0.551677
Tb427-110026200	1.01478	1.22527	0.271935
Tb427-010010700	1.01381	1.2583	0.311694
Tb427-040011900	1.01182	1.32165	0.385392
Tb427-100050500	1.01029	0.915533	-0.142085
Tb427-110159900	1.00972	0.717033	-0.493847
Tb427-100146100	1.00803	0.937864	-0.104091
Tb427-070017100	1.0079	0.803657	-0.3267
Tb427-060050300	1.00777	1.11261	0.142781
Tb427-110014500	1.00739	1.09828	0.124622
Tb427-080021400	1.00711	0.841761	-0.258734
Tb427-090063600	1.00661	1.01398	0.0105238
Tb427-080056000	1.00588	0.957523	-0.0710823
Tb427-030013800	1.00225	0.695086	-0.527972
Tb427-090052700	1.00121	0.980634	-0.029958
Tb427-100131300	1.00033	1.15152	0.203062
Tb427-110161200	1.00021	0.892448	-0.164467
Tb427-100005600	0.998618	1.00418	0.00801775
Tb427-110129500	0.997866	1.20568	0.272932
Tb427-110099000	0.99773	0.849965	-0.231247
Tb427-090007300	0.997552	1.19177	0.256647
Tb427-010022700	0.997075	0.950856	-0.0684758
Tb427-100041100	0.996314	0.961466	-0.051364
Tb427-030057900	0.995395	0.652167	-0.610028
Tb427-100144100	0.994497	0.932028	-0.0935935
Tb427-110018300	0.993409	0.916833	-0.11573
Tb427-070072300	0.991291	0.983049	-0.0120455
Tb427-100085300	0.989764	0.844891	-0.228319
Tb427-070068300	0.989147	1.20927	0.289873
Tb427-110045900	0.988632	0.67386	-0.552984
Tb427-030024800	0.988345	1.27091	0.362774
Tb427-030008400	0.985578	0.837929	-0.234142
Tb427-090011500	0.98492	1.07164	0.121746
Tb427-040005700	0.984268	0.759597	-0.373816
Tb427-110131400	0.984056	1.1746	0.255354
Tb427-040054200	0.983127	1.02153	0.055278
Tb427-070030400	0.982046	0.870357	-0.174184
Tb427-110089100	0.980633	0.795435	-0.30197
Tb427-090070700	0.979763	0.919582	-0.0914555
Tb427-100095900	0.979363	0.676189	-0.534417
Tb427-100165400	0.978292	1.09811	0.166686
Tb427-050039800	0.977388	0.801693	-0.28588
Tb427-050026400:pseudogene	0.976996	0.969779	-0.0106965
Tb427-070006000	0.976926	1.10459	0.177193
Tb427-110042900	0.976663	1.28717	0.398268
Tb427-110073400	0.976023	0.885404	-0.140579
Tb427-090058100	0.975329	0.778582	-0.32504
Tb427-100104500	0.974438	0.953184	-0.0318164
Tb427-110046500	0.972748	0.803391	-0.275965
Tb427-110038700	0.972576	0.904814	-0.104189
Tb427-100085400	0.972237	0.801278	-0.279005
Tb427-090024500	0.971964	0.976367	0.00652038
Tb427-050032000	0.969747	0.728272	-0.413131
Tb427-030054100	0.969694	0.910722	-0.0905178
Tb427-110121500	0.968716	0.860369	-0.171117
Tb427-110165700	0.968292	0.908551	-0.0918748
Tb427-100165600	0.967953	1.08841	0.16921
Tb427-070041600	0.967001	1.05388	0.12412
Tb427-090017400	0.96665	0.889672	-0.119721
Tb427-110108700	0.966433	0.930309	-0.0549598
Tb427-100092200	0.965474	1.08049	0.162375
Tb427-040037800	0.965375	0.941499	-0.0361312
Tb427-110033500	0.9649	1.15541	0.259953
Tb427-030039500	0.96444	0.720442	-0.420809
Tb427-030024400	0.9644	0.735443	-0.391019
Tb427-060036600	0.96418	0.713454	-0.434481
Tb427-110184400	0.963992	0.717446	-0.42615
Tb427-060054700	0.963406	0.806561	-0.25636
Tb427-100044900	0.961628	0.896148	-0.101741
Tb427-110068200	0.960183	1.2807	0.41555
Tb427-110043600	0.959741	0.832422	-0.205329
Tb427-090070500	0.958873	1.1884	0.309613
Tb427-110087200	0.958702	1.27531	0.411695
Tb427-050025800	0.958237	0.813402	-0.236414
Tb427-040005500	0.95694	0.679687	-0.493558
Tb427-020009900	0.956386	1.16148	0.280295
Tb427-050042700	0.955971	1.21193	0.342263
Tb427-100021300	0.955489	0.742214	-0.364404
Tb427-110056900	0.953951	0.866721	-0.138347
Tb427-080070000	0.953465	0.727549	-0.390137
Tb427-110107700	0.951658	1.03213	0.117112
Tb427-110151600	0.951312	0.833931	-0.189991
Tb427-090030200	0.950067	0.896415	-0.0838631
Tb427-050016100	0.949974	0.928917	-0.0323384
Tb427-100051600	0.948875	1.08764	0.196912
Tb427-080084800	0.94856	1.0363	0.127635
Tb427-090036800	0.948443	1.02493	0.111898
Tb427-100106700	0.948386	0.631274	-0.587207
Tb427-080005200	0.948267	1.85637	0.969119
Tb427-070030000	0.947663	0.957586	0.0150279
Tb427-110123500	0.947472	0.8851	-0.098244
Tb427-100047400	0.946898	0.960621	0.0207592
Tb427-010030100	0.946425	1.13093	0.256945
Tb427-020013100	0.9462	0.846287	-0.160998
Tb427-110184700	0.94603	0.795906	-0.249287
Tb427-110011700	0.945944	0.844587	-0.163508
Tb427-070039000	0.944863	1.14183	0.273171
Tb427-060009800	0.943798	1.01255	0.101441
Tb427-110120700	0.943322	1.04715	0.150653
Tb427-110069500	0.943281	0.926504	-0.0258913
Tb427-110030000	0.943156	0.585229	-0.688496
Tb427-070079300	0.942673	0.848087	-0.152544
Tb427-070078900	0.94213	0.737185	-0.353901
Tb427-110082100	0.941802	0.556531	-0.75896
Tb427-080009800	0.941245	0.712589	-0.401499
Tb427-080011200	0.941008	0.885095	-0.0883746
Tb427-080069600	0.940937	0.823207	-0.192843
Tb427-100145500	0.940052	0.919165	-0.0324177
Tb427-040056300	0.939613	1.35584	0.529046
Tb427-070023900	0.939544	0.678964	-0.468626
Tb427-070028600	0.939479	0.866961	-0.115895
Tb427-080028900	0.939161	0.792885	-0.24426
Tb427-110127700	0.938965	0.774915	-0.277034
Tb427-090069900	0.936115	0.779737	-0.263698
Tb427-100151000	0.936083	0.781945	-0.259568
Tb427-030033700	0.935312	1.66468	0.831729
Tb427-100041700	0.934731	0.754722	-0.308606
Tb427-110013000	0.93301	1.00063	0.100951
Tb427-090087100	0.931291	0.825715	-0.173588
Tb427-070009800	0.931066	0.726712	-0.357499
Tb427-070010200	0.930001	0.777563	-0.258273
Tb427-030059300	0.929924	0.898815	-0.0490882
Tb427-050015900	0.929099	1.01322	0.125046
Tb427-070032000	0.929001	1.00027	0.10663
Tb427-110150400	0.928676	0.912133	-0.0259305
Tb427-080027900	0.928461	0.681718	-0.445666
Tb427-110185400	0.927884	0.694319	-0.418345
Tb427-100012000	0.926962	0.63433	-0.547276
Tb427-030006600	0.925829	0.990836	0.0979
Tb427-090085100	0.92535	0.909424	-0.0250465
Tb427-070014300	0.924493	1.14524	0.308912
Tb427-070054400	0.923873	1.10941	0.264028
Tb427-090015800	0.92267	0.790217	-0.223566
Tb427-090077900	0.922631	0.952599	0.0461143
Tb427-070074200	0.92221	1.15727	0.327558
Tb427-090089100	0.91961	0.945753	0.0404401
Tb427-100128300	0.919603	0.746855	-0.300183
Tb427-040048600	0.919531	0.918528	-0.00157335
Tb427-070057300	0.919039	0.701183	-0.390336
Tb427-050044500	0.91891	0.861519	-0.093041
Tb427-100028000	0.918349	0.672438	-0.449642
Tb427-060019600:pseudogene	0.918303	0.710642	-0.369849
Tb427-100018600	0.917996	0.805685	-0.188271
Tb427-110036200	0.917492	0.86041	-0.0926722
Tb427-100139900	0.916922	0.632886	-0.534854
Tb427-080066500	0.91678	0.990632	0.111773
Tb427-110100100	0.915631	0.560691	-0.707561
Tb427-100071000	0.915629	0.902566	-0.0207311
Tb427-080016700	0.915551	0.953873	0.0591573
Tb427-110111000	0.913842	0.797799	-0.195918
Tb427-070006500	0.913472	1.04227	0.190299
Tb427-100110600	0.912602	1.08939	0.255458
Tb427-040031200	0.911752	0.705697	-0.369591
Tb427-100031600	0.911295	0.710204	-0.359684
Tb427-110066500	0.90967	1.04668	0.202407
Tb427-100047500	0.909138	0.902639	-0.0103496
Tb427-060026000	0.908846	1.09724	0.271771
Tb427-110167200	0.908521	0.962437	0.0831726
Tb427-070081000	0.905261	1.12986	0.319745
Tb427-080069000	0.905142	0.864053	-0.0670236
Tb427-100086800	0.904598	0.835652	-0.114374
Tb427-030021200	0.904565	0.915346	0.0170926
Tb427-030023600	0.904475	0.953711	0.0764718
Tb427-100119300	0.904453	1.11745	0.305095
Tb427-080060300	0.904312	0.866657	-0.0613594
Tb427-110132000	0.903728	0.835551	-0.113161
Tb427-060024200	0.903122	1.01703	0.171368
Tb427-110135400	0.903025	0.636248	-0.505177
Tb427-040030500:pseudogene	0.903008	0.782461	-0.206719
Tb427-110167700	0.902532	0.58506	-0.625392
Tb427-070036500	0.901843	0.887564	-0.0230247
Tb427-110018400	0.901769	0.735888	-0.293272
Tb427-100018500	0.9012	1.14182	0.341421
Tb427-070073000	0.900956	1.28421	0.51135
Tb427-070081200	0.900707	1.16889	0.376003
Tb427-030045800	0.900532	1.43952	0.676737
Tb427-110111500	0.899596	0.670717	-0.423572
Tb427-100095000	0.898896	0.874343	-0.0399543
Tb427-090045700	0.898895	0.894755	-0.00665914
Tb427-020020900	0.898191	0.841679	-0.0937519
Tb427-100045500:pseudogene	0.898078	1.003	0.159408
Tb427-110186500	0.897858	0.831463	-0.110835
Tb427-020018700	0.896633	0.78678	-0.188556
Tb427-090029200	0.894806	0.777263	-0.203172
Tb427-050020900	0.894649	0.954059	0.0927568
Tb427-060017200	0.89424	0.716582	-0.31953
Tb427-100056100	0.893753	0.839925	-0.0896162
Tb427-050031400	0.893012	0.615457	-0.537021
Tb427-110076600	0.89279	0.878296	-0.0236132
Tb427-110023700	0.892007	0.823667	-0.114995
Tb427-090084000	0.891903	1.12112	0.329987
Tb427-110039000	0.891902	0.68584	-0.379013
Tb427-030038600	0.891654	1.0494	0.235003
Tb427-080043400	0.891439	0.721685	-0.304768
Tb427-080078900	0.891215	0.75093	-0.247095
Tb427-110141000	0.890652	0.694702	-0.358467
Tb427-040006800	0.890528	0.744331	-0.258718
Tb427-070078300	0.890295	0.70504	-0.33658
Tb427-100063000	0.890016	0.455796	-0.965444
Tb427-100070700	0.889552	0.899678	0.0163293
Tb427-100167000	0.889263	0.785006	-0.179907
Tb427-070078600	0.889128	0.737748	-0.269263
Tb427-090083800	0.88878	1.05307	0.244699
Tb427-070031300	0.886774	0.945967	0.0932238
Tb427-030006700	0.886453	0.672826	-0.39781
Tb427-030013200	0.884694	0.572104	-0.628902
Tb427-050022000	0.883317	0.809194	-0.126445
Tb427-080063300:pseudogene	0.882353	0.796856	-0.147038
Tb427-030024100	0.882037	0.978774	0.150137
Tb427-060046700	0.881849	0.715145	-0.302295
Tb427-100015600	0.881818	0.578798	-0.607423
Tb427-100162000	0.881338	0.818448	-0.106806
Tb427-100063200	0.880803	0.630676	-0.481921
Tb427-040052400	0.880187	1.10054	0.322335
Tb427-070011000	0.880177	0.961544	0.127559
Tb427-060010300	0.879461	1.16853	0.410005
Tb427-110042500	0.879105	0.821484	-0.0978044
Tb427-080068000	0.877501	0.876651	-0.00139748
Tb427-110108800	0.876833	0.836818	-0.067387
Tb427-090060000	0.876544	0.893068	0.0269419
Tb427-020016400	0.875854	0.742325	-0.238641
Tb427-070037500	0.875824	0.6243	-0.488402
Tb427-060014200	0.875313	0.582966	-0.586386
Tb427-040042200	0.874672	0.691698	-0.338601
Tb427-100153300	0.873471	0.772043	-0.178078
Tb427-100046700	0.872424	0.724412	-0.268218
Tb427-050014100	0.872071	1.04899	0.266482
Tb427-100066400	0.871759	0.836479	-0.0596002
Tb427-060032200:pseudogene	0.871643	0.538917	-0.693675
Tb427-090031500	0.871288	0.613175	-0.506851
Tb427-020006500	0.871223	0.726111	-0.262851
Tb427-080020300	0.871135	0.830002	-0.0697808
Tb427-050025300	0.870679	0.699913	-0.314965
Tb427-100082200	0.870077	0.867143	-0.0048728
Tb427-040021300	0.870051	0.662776	-0.392579
Tb427-080067100	0.870046	1.05016	0.271449
Tb427-030031200	0.869936	0.837386	-0.0550176
Tb427-100087200	0.869651	0.911216	0.0673562
Tb427-020023400	0.869602	0.879538	0.0163912
Tb427-100033700	0.869169	0.613988	-0.501427
Tb427-070035800	0.868521	1.2012	0.467845
Tb427-080067700	0.868038	0.781387	-0.151721
Tb427-080018900	0.866763	0.904613	0.0616641
Tb427-040050500	0.866319	0.786178	-0.140042
Tb427-060036000	0.865566	0.892934	0.0449093
Tb427-100148500	0.864839	0.985951	0.189084
Tb427-080008300	0.864637	0.812669	-0.0894265
Tb427-100117400	0.86454	0.77692	-0.154168
Tb427-070078100	0.864268	0.684974	-0.335428
Tb427-110010200	0.864168	0.813382	-0.0873786
Tb427-100036300	0.863013	0.836225	-0.0454916
Tb427-110032800	0.863009	0.702145	-0.297607
Tb427-110098700	0.862942	0.662184	-0.382032
Tb427-110069200	0.862196	0.619708	-0.476426
Tb427-050042600	0.86194	0.998033	0.2115
Tb427-090011400	0.861906	0.972643	0.174381
Tb427-110036400	0.861791	1.02237	0.246513
Tb427-100113000	0.861109	0.615981	-0.48331
Tb427-110090400	0.860179	0.702667	-0.291796
Tb427-100033900	0.860058	0.791657	-0.119559
Tb427-070027900	0.860029	0.632527	-0.443259
Tb427-110055300	0.859541	0.651407	-0.400006
Tb427-030057200	0.859179	0.661854	-0.376446
Tb427-070013300	0.85913	0.760539	-0.175855
Tb427-020030400	0.857992	1.13584	0.404729
Tb427-110187500	0.857973	0.853212	-0.00802774
Tb427-090015400	0.857799	0.730673	-0.231413
Tb427-100150000	0.857791	0.729995	-0.232739
Tb427-090055600	0.857736	0.887005	0.0484096
Tb427-110011500	0.857588	0.664174	-0.368723
Tb427-100057500	0.856751	0.969397	0.178211
Tb427-110138200	0.856195	0.886312	0.049875
Tb427-070005500	0.856168	0.622839	-0.459035
Tb427-060056300	0.855182	0.959489	0.166035
Tb427-100124000	0.854905	0.751078	-0.186802
Tb427-050030300	0.854851	0.95424	0.158679
Tb427-100037500	0.854405	0.845256	-0.0155328
Tb427-050033000	0.853905	0.632837	-0.432242
Tb427-040019100	0.853241	0.733147	-0.218851
Tb427-100096800	0.853178	0.561832	-0.602707
Tb427-090045500	0.852388	0.828483	-0.0410379
Tb427-090029300	0.852327	0.998602	0.228503
Tb427-030039100	0.852194	0.963089	0.176487
Tb427-110042600	0.851949	1.03847	0.285621
Tb427-100042300	0.851814	0.578615	-0.557935
Tb427-080025300	0.851211	0.891509	0.066733
Tb427-070077300	0.85116	0.963922	0.179486
Tb427-110124200	0.851059	0.605495	-0.491146
Tb427-100093100	0.850702	0.731105	-0.218574
Tb427-090005900	0.850646	0.570876	-0.575382
Tb427-070029500	0.850594	0.899592	0.0808006
Tb427-100005800	0.850563	0.761213	-0.160118
Tb427-040032000	0.849719	0.826574	-0.0398412
Tb427-100123900	0.849441	0.905886	0.0928151
Tb427-110155000	0.849392	1.02238	0.267423
Tb427-030044700	0.848899	0.979098	0.205861
Tb427-090025700	0.848652	0.746783	-0.184484
Tb427-110087800	0.848614	0.887892	0.0652762
Tb427-070072600	0.848033	0.769	-0.141136
Tb427-020021200	0.847685	0.90237	0.0901905
Tb427-100055000	0.847224	0.877463	0.050594
Tb427-060033900	0.847195	0.709431	-0.256031
Tb427-110120100	0.847182	0.567896	-0.577047
Tb427-070009900	0.846539	0.660555	-0.357896
Tb427-090025300	0.845476	0.792306	-0.0937055
Tb427-090050700	0.845474	0.536787	-0.65541
Tb427-060023100	0.845108	0.824494	-0.0356263
Tb427-110085000	0.844949	0.802695	-0.0740137
Tb427-110123400	0.844799	0.661232	-0.353453
Tb427-110188100	0.844788	0.783434	-0.108779
Tb427-040018800	0.844397	0.707678	-0.254829
Tb427-040017800	0.844208	0.704345	-0.261315
Tb427-010031100	0.843997	0.461026	-0.87239
Tb427-050031600	0.843828	0.462606	-0.867164
Tb427-060018400	0.843749	0.717465	-0.233905
Tb427-090083100	0.843408	0.858641	0.0258258
Tb427-030011800	0.843294	0.914946	0.117651
Tb427-050045700	0.84311	0.727174	-0.213419
Tb427-100029200	0.842542	0.869704	0.0457755
Tb427-060044500	0.842395	0.919872	0.126936
Tb427-060055800	0.841426	0.922422	0.13259
Tb427-110068500	0.841163	0.846015	0.00829849
Tb427-020008900	0.840664	0.875565	0.0586862
Tb427-080077500	0.840558	1.09642	0.383385
Tb427-030012600	0.839954	0.678696	-0.307546
Tb427-040012700	0.83944	0.936364	0.157641
Tb427-010030200	0.839213	0.62719	-0.420136
Tb427-110140800	0.83909	0.932987	0.153032
Tb427-100134600	0.838333	0.709339	-0.241049
Tb427-100118600	0.838323	1.00349	0.259445
Tb427-050027200	0.837961	1.03301	0.301896
Tb427-100068400:pseudogene	0.837139	0.944043	0.173385
Tb427-050013800	0.837002	0.853974	0.0289607
Tb427-110076300	0.836789	0.898319	0.102364
Tb427-100039700	0.836704	0.589323	-0.505657
Tb427-090054700	0.836678	1.06321	0.345679
Tb427-100162400	0.836103	0.429919	-0.959616
Tb427-030054300	0.836065	1.16934	0.484006
Tb427-080046500	0.835702	0.486393	-0.780865
Tb427-090071600	0.835471	0.61619	-0.439215
Tb427-100089700	0.834683	0.947638	0.183107
Tb427-010019900	0.834275	0.604993	-0.463606
Tb427-090059800	0.834117	0.615972	-0.437386
Tb427-100076200	0.834074	0.76651	-0.12187
Tb427-080075700	0.833856	0.800239	-0.0593666
Tb427-090048600	0.833442	0.935061	0.165977
Tb427-110043000	0.833123	0.619144	-0.428253
Tb427-030021900	0.83293	0.841904	0.0154607
Tb427-110100200	0.831008	0.758796	-0.131151
Tb427-100156100	0.830893	0.816083	-0.0259474
Tb427-070016200	0.830735	0.823564	-0.0125081
Tb427-040057100	0.830528	0.733096	-0.180026
Tb427-020013600	0.830305	0.805988	-0.0428832
Tb427-090054500	0.830077	0.984765	0.246536
Tb427-110018800	0.829575	0.720248	-0.203879
Tb427-060011600	0.829483	0.707192	-0.230111
Tb427-060023300	0.828046	0.6767	-0.291195
Tb427-110166800	0.827652	0.719315	-0.2024
Tb427-050029100	0.827634	0.732515	-0.176134
Tb427-030058600	0.827389	0.470858	-0.813272
Tb427-080053800	0.826811	0.977529	0.241582
Tb427-050037500	0.826568	0.765342	-0.111028
Tb427-020020400	0.826553	0.480488	-0.782607
Tb427-110061100	0.825301	0.731173	-0.174707
Tb427-080018000	0.824861	1.115	0.434819
Tb427-070055100	0.824791	0.767176	-0.104471
Tb427-040018600	0.824463	0.791226	-0.0593648
Tb427-100043600	0.824298	0.841037	0.0290024
Tb427-050044700	0.823962	0.657323	-0.325975
Tb427-100094600	0.822532	0.570952	-0.526702
Tb427-110070700	0.821882	1.01684	0.307084
Tb427-110139900	0.821477	0.895961	0.125215
Tb427-070068000	0.820816	0.806322	-0.0257037
Tb427-100054600	0.820325	0.866679	0.0793034
Tb427-110007700	0.820077	0.809873	-0.0180638
Tb427-110074700	0.820035	0.781082	-0.0702118
Tb427-090009500	0.819743	0.920605	0.16741
Tb427-090090300	0.819651	0.858574	0.066934
Tb427-110108200	0.819601	0.902874	0.139602
Tb427-100057900	0.81909	0.713433	-0.199244
Tb427-100072500	0.817791	0.820849	0.00538529
Tb427-090080500	0.81777	0.591658	-0.466931
Tb427-070017800	0.81737	0.679295	-0.266951
Tb427-050034300	0.817365	0.620356	-0.397884
Tb427-080085200	0.817169	0.6345	-0.365016
Tb427-110012700	0.816901	0.73683	-0.148829
Tb427-030013100	0.816435	0.701679	-0.218527
Tb427-060013300	0.814608	0.619228	-0.395636
Tb427-060043700	0.814413	0.715161	-0.187493
Tb427-100023700:pseudogene	0.814356	0.917563	0.172149
Tb427-110045500	0.813879	0.606437	-0.424457
Tb427-060012100	0.813827	0.663085	-0.295528
Tb427-080081800	0.813495	0.973146	0.258523
Tb427-070037000	0.813249	0.541613	-0.586434
Tb427-010015200	0.812889	0.732492	-0.150246
Tb427-100119500	0.812419	0.859977	0.0820737
Tb427-090052500	0.812296	0.693251	-0.228627
Tb427-100034300	0.812208	0.715182	-0.18354
Tb427-100011200	0.812037	0.515938	-0.654349
Tb427-030009600	0.811689	0.736147	-0.140933
Tb427-010013500	0.811275	0.476513	-0.767674
Tb427-110143100	0.81125	0.831763	0.0360274
Tb427-110032400	0.81097	0.743235	-0.125829
Tb427-060051700	0.810213	0.903696	0.157537
Tb427-100066000	0.810113	0.908262	0.164986
Tb427-090089700	0.809836	0.732346	-0.145105
Tb427-070052900	0.809606	0.945985	0.224597
Tb427-110179200	0.808746	0.827793	0.0335821
Tb427-040025700	0.808426	0.659119	-0.294576
Tb427-100067000	0.80836	0.713604	-0.179875
Tb427-100012800	0.807754	0.713043	-0.179928
Tb427-110068400	0.807095	0.622774	-0.374029
Tb427-010012500	0.806889	0.433705	-0.895656
Tb427-060010100	0.80669	0.854353	0.0828179
Tb427-030012700	0.806671	0.920235	0.190021
Tb427-100037300	0.806308	0.806161	-0.000263811
Tb427-060033600	0.805905	0.644971	-0.321377
Tb427-050040400	0.80546	0.896086	0.153825
Tb427-030044500	0.805263	0.749563	-0.10341
Tb427-060053000	0.804757	0.765532	-0.072092
Tb427-100045600	0.80427	0.893748	0.152187
Tb427-070078400	0.804113	0.605444	-0.409403
Tb427-070073100	0.803972	1.09215	0.441951
Tb427-070048800	0.803887	0.483762	-0.732695
Tb427-110059600	0.803606	0.84595	0.0740835
Tb427-030010400	0.803191	0.709554	-0.178829
Tb427-070040400	0.803019	0.526088	-0.610131
Tb427-100163900	0.802925	0.837532	0.0608777
Tb427-050015200	0.80245	1.14013	0.506712
Tb427-060041600	0.802243	0.613168	-0.387756
Tb427-110076400	0.801761	0.867957	0.114452
Tb427-100157600	0.801732	0.87527	0.126608
Tb427-090009000	0.801674	1.03356	0.366531
Tb427-110165200	0.801215	0.562099	-0.511365
Tb427-080009000	0.800568	0.785966	-0.0265562
Tb427-040041400	0.79939	0.623666	-0.358128
Tb427-070072800	0.799174	0.902389	0.175241
Tb427-080033100	0.799105	1.03186	0.368792
Tb427-080085500	0.798875	0.773674	-0.0462428
Tb427-060009400:pseudogene	0.798806	0.892852	0.160576
Tb427-050052600	0.79854	0.855252	0.0989853
Tb427-110161100	0.798164	0.761007	-0.0687764
Tb427-050009500	0.79791	1.01485	0.346963
Tb427-100051200	0.797642	0.961311	0.269262
Tb427-070077600	0.797523	0.584048	-0.44944
Tb427-100040900	0.797152	0.689986	-0.208287
Tb427-070029900	0.796543	0.900934	0.177669
Tb427-110030900	0.796513	0.665574	-0.259099
Tb427-010020800	0.79606	0.755567	-0.0753181
Tb427-080005700	0.795997	0.589519	-0.433226
Tb427-080052500	0.79475	0.713626	-0.155333
Tb427-110043900	0.79454	0.569709	-0.479894
Tb427-110158800	0.794395	0.678875	-0.226709
Tb427-100057600	0.794252	0.621969	-0.352755
Tb427-110078400	0.793527	0.796687	0.00573357
Tb427-100105000	0.793305	0.794967	0.00301972
Tb427-080059900	0.793072	0.899715	0.182015
Tb427-110146800	0.792256	1.02954	0.377968
Tb427-090084600	0.791494	0.825371	0.0604644
Tb427-090071700	0.791376	0.860017	0.120001
Tb427-090035000	0.790744	0.703269	-0.169135
Tb427-020031200	0.789565	0.935764	0.245087
Tb427-030029900	0.789327	1.1016	0.480901
Tb427-070082200	0.7888	0.83179	0.0765594
Tb427-110178600	0.788623	0.847202	0.103369
Tb427-090022900	0.78846	0.741384	-0.0888169
Tb427-100079400	0.788197	0.675244	-0.223148
Tb427-110010100	0.787591	0.840634	0.09403
Tb427-070082100	0.787492	0.865949	0.137016
Tb427-100058500	0.78531	0.784993	-0.00058241
Tb427-110079500	0.784607	0.95001	0.275971
Tb427-100033000	0.784463	0.552284	-0.506294
Tb427-100068000	0.784423	0.650142	-0.270877
Tb427-000731800	0.784029	0.849943	0.116461
Tb427-100095500	0.783371	0.750833	-0.0612028
Tb427-020016600	0.783207	0.531248	-0.56001
Tb427-070058000	0.782397	0.683766	-0.194399
Tb427-090047100	0.782036	0.702245	-0.15526
Tb427-040030800	0.781378	0.782814	0.00264858
Tb427-060036200	0.781316	0.601167	-0.378141
Tb427-060024400	0.781238	0.886431	0.182246
Tb427-100105200	0.781143	0.730604	-0.0964969
Tb427-100055800	0.780601	0.789537	0.0164227
Tb427-020005200	0.780432	0.90949	0.220786
Tb427-010029000	0.77904	0.758424	-0.0386919
Tb427-060041200	0.778992	0.615505	-0.339838
Tb427-100108100	0.778987	0.661714	-0.23539
Tb427-010033000	0.778335	1.0364	0.413118
Tb427-080078800	0.777547	0.678431	-0.196728
Tb427-050028100	0.777495	0.769626	-0.0146753
Tb427-090055800	0.777377	0.74329	-0.0646887
Tb427-080011800	0.77698	0.796941	0.0365945
Tb427-090066400	0.776757	0.764053	-0.0237891
Tb427-040046200	0.776723	0.674024	-0.204601
Tb427-100056500	0.775767	0.875755	0.174904
Tb427-080043100	0.775489	0.795613	0.036961
Tb427-040021000	0.775356	0.818175	0.0775516
Tb427-070047300	0.774126	0.594845	-0.380053
Tb427-090068100	0.774121	0.495864	-0.642614
Tb427-110060100	0.773868	0.706727	-0.130934
Tb427-050051300	0.773831	0.844471	0.12603
Tb427-050038100	0.773829	0.663617	-0.221663
Tb427-080024100	0.773685	0.883368	0.191269
Tb427-100042800	0.773357	0.465913	-0.731074
Tb427-100156400	0.772984	0.953092	0.302177
Tb427-080058400	0.772908	0.729439	-0.0835094
Tb427-040048800	0.772896	0.899142	0.218275
Tb427-110072500	0.772849	0.506553	-0.609473
Tb427-110104600	0.772705	0.919741	0.25131
Tb427-110142100	0.772187	0.717858	-0.105251
Tb427-040024800	0.772029	0.822756	0.0918095
Tb427-090064100	0.771969	1.01174	0.390225
Tb427-100110100	0.771622	0.626242	-0.301175
Tb427-040053600	0.771285	0.808431	0.0678598
Tb427-010028600	0.770982	0.716434	-0.105863
Tb427-010028100	0.770886	0.868104	0.171349
Tb427-070070200	0.770748	0.679135	-0.182561
Tb427-110099100	0.77059	0.515311	-0.580522
Tb427-080088500	0.770434	0.726227	-0.0852507
Tb427-090043700	0.770203	0.762169	-0.0151279
Tb427-090064700	0.769847	0.904463	0.232491
Tb427-090054600	0.768611	0.879124	0.193813
Tb427-050050600	0.768137	0.673263	-0.190194
Tb427-050006000	0.767767	0.647507	-0.245773
Tb427-010006700	0.765915	0.685433	-0.160169
Tb427-100096900	0.765808	0.672933	-0.18652
Tb427-100115200	0.765796	0.965219	0.333896
Tb427-100008300:pseudogene	0.765704	0.61659	-0.312476
Tb427-030037400	0.765662	0.706319	-0.116388
Tb427-020018600	0.765651	0.729963	-0.0688631
Tb427-080041300	0.765353	0.639833	-0.258431
Tb427-100088600	0.764745	0.789991	0.0468567
Tb427-020031700	0.764235	0.88532	0.212181
Tb427-060051500	0.764235	0.79607	0.0588797
Tb427-110095300	0.764192	0.997822	0.384847
Tb427-050022400	0.763321	0.94874	0.313723
Tb427-060047000	0.763084	0.804948	0.0770538
Tb427-110073200	0.762974	0.586932	-0.378441
Tb427-100064300	0.762759	0.483768	-0.656914
Tb427-110131600	0.76274	0.906188	0.248619
Tb427-010029600	0.762679	0.660097	-0.208398
Tb427-100163800	0.762554	0.719102	-0.0846445
Tb427-070068800	0.762472	0.827766	0.118538
Tb427-110081200	0.762296	0.727695	-0.0670182
Tb427-050031900	0.762047	0.541821	-0.492062
Tb427-060050500	0.761545	0.844609	0.149355
Tb427-100009800	0.760868	0.546378	-0.477747
Tb427-100065500	0.759741	0.775083	0.0288422
Tb427-020021900	0.75927	0.581341	-0.385229
Tb427-070016300	0.758684	0.583967	-0.377613
Tb427-080084500	0.75843	1.32137	0.800952
Tb427-090066800	0.758402	0.781312	0.0429353
Tb427-110139100	0.758262	0.976848	0.365437
Tb427-110060200	0.75795	0.762604	0.00883065
Tb427-110034500	0.757913	0.764081	0.0116935
Tb427-100135300	0.757781	0.849885	0.165486
Tb427-110146600	0.757622	0.82527	0.123388
Tb427-100069900	0.757415	0.674083	-0.168158
Tb427-110054600	0.756966	0.880881	0.218718
Tb427-030051000	0.755863	0.835214	0.144021
Tb427-100161600	0.755787	0.718519	-0.0729523
Tb427-060018600	0.755656	0.610054	-0.308793
Tb427-060020500	0.755438	0.843601	0.159247
Tb427-090087300	0.754734	0.787337	0.0610123
Tb427-100039800	0.754616	0.635564	-0.247704
Tb427-050022700	0.754315	0.760424	0.0116381
Tb427-080064200	0.754041	0.619757	-0.28294
Tb427-110068600	0.753984	0.514657	-0.550922
Tb427-100053900	0.753798	0.788993	0.0658348
Tb427-100155300	0.753637	0.639724	-0.23642
Tb427-020008300	0.752554	0.734112	-0.0357947
Tb427-080043700:pseudogene	0.752516	0.824301	0.131449
Tb427-090075000	0.752507	0.837513	0.154406
Tb427-100138200	0.752143	0.583742	-0.365676
Tb427-080053200	0.752087	0.766859	0.0280624
Tb427-100067500	0.752076	0.85298	0.181633
Tb427-110128300	0.751519	0.768154	0.0315857
Tb427-110170000	0.750846	0.597951	-0.328491
Tb427-080005500	0.75066	0.476104	-0.656884
Tb427-110166600	0.749965	0.487348	-0.62187
Tb427-100018200	0.749838	0.741737	-0.0156695
Tb427-100030800	0.749623	0.735074	-0.028276
Tb427-110187000	0.749575	0.7063	-0.0857908
Tb427-110027800	0.749336	0.591544	-0.341128
Tb427-060033500	0.748792	0.551002	-0.442508
Tb427-110033900	0.748597	0.907764	0.278127
Tb427-090079900	0.748474	0.451118	-0.730445
Tb427-100148300	0.748417	0.768276	0.0377826
Tb427-080068200	0.747716	0.708089	-0.078558
Tb427-100157900	0.747598	0.863273	0.207555
Tb427-000270300	0.74667	0.674779	-0.146056
Tb427-110009600	0.74646	0.910898	0.287223
Tb427-050023900	0.746411	0.7889	0.0798729
Tb427-100044200	0.745859	0.932593	0.322344
Tb427-100011700	0.745797	0.596642	-0.321916
Tb427-110006200	0.745713	0.586121	-0.347422
Tb427-110082400	0.745643	0.624308	-0.256227
Tb427-030045400	0.745599	0.854846	0.197264
Tb427-070025400	0.745514	1.27229	0.771123
Tb427-100152100	0.745412	0.479592	-0.636231
Tb427-100079000	0.744587	0.758056	0.0258638
Tb427-100126300	0.743338	0.565838	-0.393628
Tb427-100155600	0.743337	1.0358	0.47865
Tb427-110050800	0.743235	0.802407	0.110515
Tb427-070050500	0.742794	1.03935	0.484644
Tb427-070025500	0.742677	0.710812	-0.0632655
Tb427-110155500	0.742538	0.739122	-0.00665146
Tb427-060052500:pseudogene	0.742287	0.940741	0.341821
Tb427-100165100	0.742258	0.570784	-0.378975
Tb427-040010600	0.741708	0.501509	-0.564575
Tb427-000637800	0.741582	1.19523	0.688614
Tb427-080078600	0.741505	0.742071	0.00110152
Tb427-110013700	0.741282	0.716338	-0.0493823
Tb427-090038800	0.7404	1.02419	0.468101
Tb427-110130800	0.740241	0.664745	-0.155194
Tb427-060010000	0.740071	0.852758	0.204472
Tb427-090006600	0.740052	0.550346	-0.427288
Tb427-110107300	0.739918	0.874111	0.240451
Tb427-030017700	0.739847	0.511093	-0.533639
Tb427-030007700	0.739472	0.787873	0.0914673
Tb427-070074100	0.739411	0.769716	0.057951
Tb427-060019500	0.739357	0.57955	-0.351338
Tb427-030009400	0.739316	0.768792	0.0564031
Tb427-050021300	0.739292	0.759342	0.0386063
Tb427-090049600	0.739248	0.743123	0.00754292
Tb427-050008800	0.738415	0.948033	0.360506
Tb427-100114000	0.737874	0.833454	0.175727
Tb427-070005800	0.737414	0.890743	0.272534
Tb427-090075800	0.737292	0.700372	-0.0741155
Tb427-080077100	0.737292	0.723545	-0.0271521
Tb427-110161300	0.737175	0.50487	-0.546095
Tb427-090072100	0.737124	0.601017	-0.2945
Tb427-110133500	0.736507	0.637832	-0.207521
Tb427-110119600	0.73649	0.435727	-0.757239
Tb427-030019200	0.735986	0.735104	-0.00172993
Tb427-040005900	0.735846	0.8387	0.18875
Tb427-060037300	0.735714	0.608271	-0.274433
Tb427-110180900	0.735622	0.919747	0.322272
Tb427-110183100	0.735497	0.718051	-0.0346335
Tb427-110040100	0.735457	0.594854	-0.306105
Tb427-110146700	0.735418	0.865023	0.234174
Tb427-110053500	0.734599	0.678697	-0.114191
Tb427-070028900	0.734373	0.791571	0.108205
Tb427-080043000	0.733476	0.932257	0.345978
Tb427-080047200	0.733273	0.515366	-0.508753
Tb427-050013300	0.732218	0.746289	0.0274619
Tb427-040015700	0.732072	0.604476	-0.276301
Tb427-050038200	0.73172	0.674166	-0.118187
Tb427-100033100:pseudogene	0.731502	0.481069	-0.604619
Tb427-110119000	0.731473	0.52275	-0.484683
Tb427-100057800	0.731226	1.45352	0.991156
Tb427-070076500	0.731201	0.509209	-0.52201
Tb427-060045900	0.731154	0.472323	-0.630403
Tb427-110128400	0.730948	0.611879	-0.256524
Tb427-070046200	0.730484	0.717108	-0.0266614
Tb427-090085800	0.730411	0.827876	0.180706
Tb427-040030600	0.730275	0.611842	-0.255281
Tb427-100011400	0.729665	0.672056	-0.118653
Tb427-100116500	0.728455	0.736368	0.0155868
Tb427-110175300	0.728105	0.61736	-0.238033
Tb427-090049000	0.727805	0.719624	-0.0163093
Tb427-080043600	0.727687	0.947468	0.38076
Tb427-050031200	0.727518	0.947476	0.381106
Tb427-110014200	0.727478	0.514821	-0.498833
Tb427-100054100	0.727165	0.828062	0.187457
Tb427-040050900	0.725843	0.601141	-0.271953
Tb427-100145200	0.725828	0.683257	-0.0872009
Tb427-100152000	0.725353	0.509432	-0.509794
Tb427-110050500	0.724923	0.763848	0.0754591
Tb427-070036100	0.724844	0.867563	0.259297
Tb427-110069600	0.724702	0.732024	0.0145032
Tb427-080069800	0.724641	0.538675	-0.42785
Tb427-100007300	0.723969	0.890682	0.298983
Tb427-010021700	0.723779	0.863648	0.254894
Tb427-110187300	0.723771	0.542836	-0.415016
Tb427-100145400	0.723548	0.655543	-0.142397
Tb427-040048400	0.723242	0.837948	0.212383
Tb427-090058500	0.723033	0.674585	-0.100063
Tb427-100059200	0.723023	0.543093	-0.412844
Tb427-030010200	0.722909	0.66286	-0.125108
Tb427-110069000	0.722864	0.714531	-0.0167266
Tb427-100039600	0.722306	0.681877	-0.083099
Tb427-100125300	0.722243	0.561613	-0.362907
Tb427-050033600	0.722172	0.592833	-0.284718
Tb427-090030800	0.72187	0.746742	0.0488694
Tb427-100107200	0.721057	0.754017	0.0644847
Tb427-070028300	0.720404	0.84994	0.238555
Tb427-080035100	0.720391	0.834789	0.212632
Tb427-110168900	0.720137	0.678604	-0.0857019
Tb427-110179100	0.719847	0.575591	-0.322647
Tb427-100026200	0.719721	0.459124	-0.648554
Tb427-100086500	0.718892	0.622743	-0.207136
Tb427-100136800	0.718747	0.788814	0.134202
Tb427-020010600	0.718573	0.732031	0.0267712
Tb427-070046600	0.718034	0.950901	0.405244
Tb427-110187800	0.717705	0.753446	0.0701136
Tb427-050022600	0.717517	0.652978	-0.13598
Tb427-060008000	0.717182	0.730886	0.0273077
Tb427-110062000	0.716998	0.542407	-0.402593
Tb427-070060600	0.716352	0.487809	-0.554354
Tb427-110145600	0.716116	0.99462	0.473952
Tb427-110063500	0.716094	0.563774	-0.345032
Tb427-080053900	0.716035	0.650594	-0.138272
Tb427-040056700	0.715989	0.85627	0.258128
Tb427-040037400	0.71589	0.719937	0.00813235
Tb427-090054400	0.715533	0.858785	0.263277
Tb427-110068000	0.71485	0.95463	0.4173
Tb427-080044600	0.714789	0.559838	-0.35251
Tb427-010016600	0.714739	0.716046	0.00263664
Tb427-110179400	0.714589	0.726096	0.0230458
Tb427-090068900	0.714408	0.647963	-0.140837
Tb427-100153900	0.714095	0.854593	0.259121
Tb427-040041000:pseudogene	0.713253	0.547946	-0.38038
Tb427-030046000	0.713182	0.677458	-0.0741386
Tb427-040020400	0.712969	0.606349	-0.233692
Tb427-100161000	0.712788	0.529479	-0.428898
Tb427-110076900	0.712644	0.625103	-0.189088
Tb427-030028100	0.712487	0.410305	-0.796169
Tb427-040020800	0.712469	0.597799	-0.253166
Tb427-110169200	0.712399	0.602354	-0.242074
Tb427-030015600	0.712337	0.635669	-0.164285
Tb427-050017700	0.712333	0.579233	-0.298409
Tb427-050011600	0.712189	0.587146	-0.278541
Tb427-070037400	0.711088	0.547427	-0.37736
Tb427-100109600	0.711061	0.569144	-0.321179
Tb427-030038700	0.710835	0.661001	-0.104862
Tb427-070027600	0.71079	0.628673	-0.177114
Tb427-060028500	0.710541	0.568889	-0.320771
Tb427-010022800	0.710261	0.769995	0.116499
Tb427-100146700	0.710127	0.668859	-0.086374
Tb427-010014800	0.710059	0.484301	-0.552035
Tb427-030054800	0.709553	0.658401	-0.107943
Tb427-030011700	0.709098	0.821931	0.213032
Tb427-090069500	0.708538	0.746214	0.0747453
Tb427-070018400	0.708389	0.605469	-0.226488
Tb427-100146400	0.708263	0.776032	0.13183
Tb427-110178800	0.70826	0.895693	0.338724
Tb427-090076100	0.708064	0.747914	0.0789927
Tb427-100152700	0.707914	0.572209	-0.307032
Tb427-100024300	0.707557	0.668931	-0.0809889
Tb427-040013300	0.707514	0.581247	-0.283608
Tb427-090042800	0.707213	0.801057	0.17976
Tb427-010013600	0.707103	0.590493	-0.260001
Tb427-060056100	0.707027	0.516869	-0.451968
Tb427-060023600	0.706778	0.748829	0.0833797
Tb427-110027600	0.706282	0.696584	-0.0199466
Tb427-090026100	0.706271	0.533903	-0.403644
Tb427-110173500	0.706116	0.512893	-0.461247
Tb427-090045400	0.705829	0.904765	0.358224
Tb427-020017000	0.705795	0.682956	-0.0474558
Tb427-070067900	0.705453	0.801904	0.184879
Tb427-030040200	0.705416	0.678339	-0.0564665
Tb427-050026700	0.705243	0.859088	0.284684
Tb427-030041300	0.704028	0.536063	-0.393231
Tb427-070009600	0.703925	0.476708	-0.562316
Tb427-110143500	0.703718	0.721518	0.036037
Tb427-020018300	0.703634	0.526866	-0.41739
Tb427-110012400	0.703544	0.953902	0.4392
Tb427-080013700	0.703368	0.67192	-0.0659914
Tb427-100058000	0.703285	0.536756	-0.389842
Tb427-100153400	0.702841	0.711428	0.017519
Tb427-110159600	0.702538	0.539068	-0.382107
Tb427-020018200	0.702191	0.589411	-0.252588
Tb427-100110500	0.701783	0.586919	-0.257863
Tb427-090028900	0.701712	0.799895	0.188931
Tb427-070025700	0.701612	0.560357	-0.324326
Tb427-070008800	0.700832	0.562177	-0.318044
Tb427-030057000	0.700589	0.690607	-0.020704
Tb427-030020800	0.700328	0.847687	0.275501
Tb427-010013200	0.700109	0.571041	-0.293986
Tb427-030007500	0.699986	0.839084	0.261489
Tb427-060052700	0.699847	0.758053	0.11526
Tb427-070056200	0.699683	0.681413	-0.0381711
Tb427-060034100	0.699382	0.48609	-0.524856
Tb427-070043100	0.699347	0.71738	0.0367285
Tb427-100038300	0.699326	0.887111	0.343149
Tb427-110020400	0.699009	0.735192	0.0728105
Tb427-110186100	0.698754	0.470525	-0.570514
Tb427-050011100	0.698385	0.855195	0.292231
Tb427-040026500	0.698313	0.528991	-0.40063
Tb427-110047300	0.69774	0.7527	0.109386
Tb427-070072700	0.697443	0.576738	-0.27416
Tb427-100153000	0.696772	0.513646	-0.439913
Tb427-070069200	0.696736	0.649427	-0.101445
Tb427-110043300	0.696611	0.935144	0.424835
Tb427-100007700	0.696385	0.721171	0.0504561
Tb427-070040300	0.69636	0.483367	-0.526714
Tb427-010014400	0.696145	0.77371	0.152405
Tb427-060043900	0.695997	0.464117	-0.584591
Tb427-080057800	0.695879	0.691923	-0.00822622
Tb427-110054300	0.695718	0.632315	-0.137859
Tb427-050036800	0.695486	0.673735	-0.0458402
Tb427-100025900	0.695464	0.808392	0.217079
Tb427-040022600	0.695367	0.849203	0.288336
Tb427-030037800	0.695156	0.675583	-0.0412038
Tb427-110125300	0.69503	0.69134	-0.00768136
Tb427-090064300	0.694913	0.718385	0.0479246
Tb427-110043100	0.694765	0.71887	0.0492053
Tb427-080049500	0.694416	0.529509	-0.391146
Tb427-110026100	0.694393	0.484998	-0.517772
Tb427-100011800	0.693587	0.553747	-0.324852
Tb427-040050400	0.693254	0.591255	-0.229603
Tb427-090089900	0.69297	0.701702	0.0180649
Tb427-110137100	0.692915	0.471305	-0.556017
Tb427-110079900	0.692342	0.675554	-0.0354141
Tb427-100129800	0.692216	0.734276	0.0851007
Tb427-110070500	0.691961	0.856593	0.307919
Tb427-060023800	0.691578	0.740241	0.0981024
Tb427-100045200	0.690658	0.866136	0.326622
Tb427-090040300	0.690378	0.603612	-0.193764
Tb427-070021300	0.69025	0.780616	0.177495
Tb427-020025100	0.690157	0.674665	-0.0327539
Tb427-090075300	0.689477	0.691851	0.00495884
Tb427-090030400	0.689257	0.676074	-0.0278617
Tb427-010030000	0.689091	0.499475	-0.464281
Tb427-110071000	0.68902	0.933691	0.438399
Tb427-100010900	0.68885	0.546762	-0.333276
Tb427-070077400	0.688476	0.560845	-0.295804
Tb427-110151800	0.688272	0.73673	0.0981591
Tb427-100042700	0.688087	0.41671	-0.723546
Tb427-110091400	0.687743	0.605791	-0.183051
Tb427-090008800	0.6877	0.846016	0.298906
MURF1	0.687465	0.510833	-0.428435
Tb427-080076500	0.687202	0.866173	0.333922
Tb427-100034200	0.686274	0.522455	-0.39348
Tb427-080066700	0.686224	0.990073	0.528856
Tb427-080041800	0.685952	0.631297	-0.119789
Tb427-070062200	0.685867	0.469887	-0.545615
Tb427-060026500	0.685841	0.777975	0.18185
Tb427-110030600	0.685784	0.519722	-0.400015
Tb427-100156900	0.68557	0.505632	-0.439216
Tb427-020019700	0.685425	0.523912	-0.387675
Tb427-110066600	0.684894	0.834547	0.285113
Tb427-100005100	0.684694	0.761073	0.152576
Tb427-070025200	0.684539	0.804856	0.233599
Tb427-090006900	0.684406	0.642693	-0.0907214
Tb427-030055400	0.684327	0.8442	0.302899
Tb427-090088100	0.684172	0.675959	-0.0174233
Tb427-100083500	0.68401	0.563903	-0.278569
Tb427-110007200	0.683961	0.488516	-0.485507
Tb427-020019000	0.683159	0.575884	-0.246442
Tb427-100103200	0.683094	0.782613	0.196215
Tb427-020025200	0.683049	0.713496	0.0629154
Tb427-030059700	0.68296	0.718529	0.0732458
Tb427-100152400	0.68275	0.430199	-0.666355
Tb427-100095600	0.682506	0.519566	-0.393535
Tb427-110133800	0.682487	0.753248	0.142324
Tb427-110077200	0.682273	0.880289	0.367627
Tb427-100147800	0.681983	0.604328	-0.174405
Tb427-100162600	0.681763	0.498923	-0.450453
Tb427-110017000	0.681457	0.571821	-0.253059
Tb427-110022000	0.681355	0.759931	0.157462
Tb427-050022800	0.681174	0.854258	0.326648
Tb427-110121000	0.681077	0.52263	-0.382026
Tb427-040018900	0.680891	0.646288	-0.0752472
Tb427-080069100	0.68045	1.24352	0.869872
Tb427-070072900	0.680001	0.961453	0.49968
Tb427-100053000	0.679978	0.808242	0.2493
Tb427-090070800	0.679855	0.540041	-0.332156
Tb427-100040400	0.67852	0.508	-0.417562
Tb427-100032200	0.677716	0.51554	-0.394597
Tb427-110081900	0.677638	0.491109	-0.464471
Tb427-080041700	0.677024	0.716408	0.081575
[truncated: 7,706 more rows]

## Sheet: BSF MAST
DE analysis between BSF fresh and frozen transcriptomes. MAST test was used via Seurat, only genes detected in atleast 25% of cells were considered.
	p_val	avg_log2FC	pct.1	pct.2	p_val_adj	cluster	gene	927	description	name	heatmap label
Tb427-100060400	4.86471e-242	1.09805	0.984	0.925	4.72072e-238	BSF fresh	Tb427_100060400	N/A	N/A	N/A	Tb427_100060400
Tb427-000668200	5.48454e-143	0.978085	0.881	0.683	5.3222e-139	BSF fresh	Tb427_000668200	N/A	N/A	N/A	Tb427_000668200
Tb427-010017400	4.37889e-132	0.925318	0.938	0.851	4.24928e-128	BSF fresh	Tb427_010017400	N/A	N/A	N/A	Tb427_010017400
Tb427-090058000	2.18918e-128	0.920448	0.894	0.759	2.12438e-124	BSF fresh	Tb427_090058000	Tb927.9.10230	Co-chaperone protein P23	P23	P23
Tb427-100060200	7.24329e-106	0.817306	0.867	0.701	7.02889e-102	BSF fresh	Tb427_100060200	Tb927.10.5620	fructose-bisphosphate aldolase, glycosomal	ALD	ALD
Tb427-000015300	2.80078e-93	0.782439	0.546	0.244	2.71788e-89	BSF fresh	Tb427_000015300	N/A	N/A	N/A	Tb427_000015300
Tb427-110013500	2.05921e-88	0.678712	0.989	0.968	1.99826e-84	BSF fresh	Tb427_110013500	Tb927.11.880	cyclophilin a	CYPA	CYPA
Tb427-000110300	4.02102e-74	0.756587	0.555	0.301	3.902e-70	BSF fresh	Tb427_000110300	N/A	N/A	N/A	Tb427_000110300
Tb427-090031800	6.04876e-69	0.720001	0.662	0.442	5.86972e-65	BSF fresh	Tb427_090031800	Tb927.9.5770	tryparedoxin peroxidase	TRYP1	TRYP1
Tb427-030040400	4.82651e-67	0.662064	0.535	0.288	4.68365e-63	BSF fresh	Tb427_030040400	Tb927.3.3760	tryparedoxin 1b, putative	TXN1b	TXN1b
Tb427-030040600	9.25708e-67	0.689446	0.572	0.339	8.98307e-63	BSF fresh	Tb427_030040600	Tb927.3.3780	tryparedoxin 1a, putative	TXN1a	TXN1a
Tb427-000014700	1.22475e-53	0.60107	0.538	0.316	1.1885e-49	BSF fresh	Tb427_000014700	N/A	N/A	N/A	Tb427_000014700
Tb427-000073700:pseudogene	9.35678e-49	0.588751	0.6	0.405	9.07982e-45	BSF fresh	Tb427_000073700:pseudogene	N/A	N/A	N/A	Tb427_000073700:pseudogene
Tb427-100055700:pseudogene	2.45004e-76	0.675408	0.524	0.262	2.37752e-72	BSF frozen	Tb427_100055700:pseudogene	N/A	N/A	N/A	Tb427_100055700:pseudogene
Tb427-050009000	1.7249e-69	0.649801	0.668	0.433	1.67384e-65	BSF frozen	Tb427_050009000	Tb927.5.470	riboflavin transporter	RibJ	RibJ
Tb427-060008400	4.10875e-60	0.641854	0.334	0.13	3.98713e-56	BSF frozen	Tb427_060008400	Tb927.6.520	EP3-2 procyclin	EP3-2	EP3-2
Tb427-110185100	2.16932e-51	0.591392	0.569	0.364	2.1051e-47	BSF frozen	Tb427_110185100	Tb927.11.16550	Zinc finger protein, C3H1 type-like	ZC3H46	ZC3H46

## Sheet: PCF MAST
DE analysis between PCF fresh and frozen transcriptomes. MAST test was used via Seurat, only genes detected in atleast 25% of cells were considered.
Feature	p_val	avg_log2FC	pct.1	pct.2	p_val_adj	cluster	gene id	927 gene id	927 description	927 name	heatmap label
Tb427-100060400	0	0.91523	0.979	0.897	0	PCF fresh	Tb427_100060400	N/A	N/A	N/A	Tb427_100060400
Tb427-030033300	1.12922e-264	0.809205	0.969	0.868	1.0958e-260	PCF fresh	Tb427_030033300	Tb927.3.3270	ATP-dependent 6-phosphofructokinase, glycosomal	PFK	PFK
Tb427-100106800	7.04826e-212	0.726254	0.97	0.889	6.83963e-208	PCF fresh	Tb427_100106800	Tb927.10.10000	hypothetical protein, conserved	N/A	Tb427_100106800
Tb427-090032300	3.04932e-211	0.648892	0.984	0.945	2.95906e-207	PCF fresh	Tb427_090032300	Tb927.9.5900	glutamate dehydrogenase	GDH	GDH
Tb427-030030200	7.86422e-157	0.607639	0.972	0.906	7.63144e-153	PCF fresh	Tb427_030030200	Tb927.3.2960	inosine-adenosine-guanosine-nucleosidehydrolase	IAGNH	IAGNH
Tb427-080007500	6.2094e-144	0.627288	0.921	0.805	6.0256e-140	PCF fresh	Tb427_080007500	Tb927.8.730	nucleolar RNA-binding protein, putative	N/A	Tb427_080007500
Tb427-110015700	9.48002e-135	0.656678	0.824	0.645	9.19941e-131	PCF fresh	Tb427_110015700	Tb927.11.1110	calpain, putative	N/A	Tb427_110015700
Tb427-110118600	2.79717e-133	0.633585	0.834	0.654	2.71437e-129	PCF fresh	Tb427_110118600	Tb927.11.10340	Serine/threonine-protein phosphatase PGAM5, mitochondrial, putative	pgam5	pgam5
Tb427-070078000	1.14546e-127	0.629069	0.8	0.608	1.11156e-123	PCF fresh	Tb427_070078000	Tb927.7.7040	methylthioadenosine phosphorylase, putative	MTAP	MTAP
Tb427-060025400	1.03369e-122	0.636334	0.829	0.677	1.00309e-118	PCF fresh	Tb427_060025400	Tb927.6.2110	40S ribosomal protein S30, putative	N/A	Tb427_060025400
Tb427-110021800	3.60339e-119	0.590545	0.845	0.696	3.49673e-115	PCF fresh	Tb427_110021800	Tb927.11.1710	guide RNA-binding protein of 21 kDa	gBP21	gBP21
Tb427-070035000	2.74124e-107	0.589564	0.626	0.409	2.6601e-103	PCF fresh	Tb427_070035000	Tb927.7.2980	Nitroreductase family, putative	N/A	Tb427_070035000
Tb427-080040400	6.16743e-102	0.639822	0.42	0.23	5.98487e-98	PCF fresh	Tb427_080040400	Tb927.8.3540	hypothetical protein, conserved	N/A	Tb427_080040400
Tb427-100108800	0	1.74112	0.528	0.067	0	PCF frozen	Tb427_100108800	Tb927.10.10210	procyclin-associated gene 4 (PAG4) protein	PAG4	PAG4
Tb427-100108900	0	1.208	0.432	0.062	0	PCF frozen	Tb427_100108900	Tb927.10.10220	procyclin-associated gene 2 (PAG2) protein	PAG2	PAG2
Tb427-100109000	6.70017e-199	0.804521	0.304	0.051	6.50184e-195	PCF frozen	Tb427_100109000	Tb927.10.10230	procyclin-associated gene 5 (PAG5) protein	PAG5	PAG5
Tb427-100109100	9.4369e-191	0.79192	0.324	0.067	9.15756e-187	PCF frozen	Tb427_100109100	Tb927.10.10240	procyclin-associated gene 1 (PAG1) protein	PAG1	PAG1
Tb427-060008500	2.8486e-113	0.693039	0.497	0.274	2.76429e-109	PCF frozen	Tb427_060008500	Tb927.6.530	procyclin associated gene 3 (PAG3) protein	PAG3	PAG3
Tb427-080005100:pseudogene	1.62785e-81	0.715241	0.647	0.505	1.57966e-77	PCF frozen	Tb427_080005100:pseudogene	N/A	N/A	N/A	Tb427_080005100:pseudogene
